# Supplementary material for: Catalysis enabled synthesis, structures, and reactivities of fluorinated S8-corona[n]arenes (n = 8–12)
Source: Chem Sci. 2022 Nov 16;14(1):70–7. doi: 10.1039/d2sc05348a (PMC9769089; doi:10.1039/d2sc05348a)
Supplement: SC-014-D2SC05348A-s002 [file SC-014-D2SC05348A-s002.xlsx]

## Sheet: Model
Numerical integration model applied
												Notes:
												Only the species in yellow (A, D, F, H) are observed (and therefore can be fitted)
												All other species (B, C, E, G) should be predicted to be present at only low concentrations if the model is valid
												Arabic numerals (1,2) and Greek characters (α, β, γ) indicate the explicit chain growth; parentheses indicate symmetric possibilities
												ks represents all slow C-S coupling events (i.e. a fluoride trans/1,4 to the leaving group)
												kf represents all fast C-S coupling events (i.e. an ArS unit trans/1,4 to the leaving group)
												ktemp represents all the templated events (featuring 2 x NMe4F induced macrocyclisation or their immediate precursors)
												A time interval of 1 min between simulated points has been used to simplify the concentration calcs
												A simple rectangle rule approach has been used for the numerical integration to simplify the concetration calcs

## Sheet: Obs
Observed (19F NMR) species A-H concentrations (μM at 0, 6, 13, 17, 28, 39, 50, 61, 72, 84 min, shown in green highlighter). After 86 min >80% of C6F6 had been consumed in the 1 mL sample
Unobserved and uncollected data have been given zero values (to aid comparison with the calculated behaviour)
			per mL
	[dithiol]0	86	μmol	ks	0.000234918	(μM)-1 min-1
	[C6F6]	8.6	μmol	kf	0.00458499	(μM)-1 min-1
				ktemp	0.224236	(μM)-1 min-1 (min-1 for G to H)
	The volume of the NMR sample is 1mL
		Time (m)
	Species	0	1	2	3	4	5	6	7	8	9	10	11	12	13	14	15	16	17	18	19	20	21	22	23	24	25	26	27	28	29	30	31	32	33	34	35	36	37	38	39	40	41	42	43	44	45	46	47
	A	8.6						6.61792							5.65092				5.4925											3.84191											3.40511
	B	0	0	0	0	0	0	0	0	0	0	0	0	0	0	0	0	0	0	0	0	0	0	0	0	0	0	0	0	0	0	0	0	0	0	0	0	0	0	0	0	0	0	0	0	0	0	0	0
	C	0	0	0	0	0	0	0	0	0	0	0	0	0	0	0	0	0	0	0	0	0	0	0	0	0	0	0	0	0	0	0	0	0	0	0	0	0	0	0	0	0	0	0	0	0	0	0	0
	D	0						2.38866							3.08369				3.38725											3.93257											4.08366
	E	0	0	0	0	0	0	0	0	0	0	0	0	0	0	0	0	0	0	0	0	0	0	0	0	0	0	0	0	0	0	0	0	0	0	0	0	0	0	0	0	0	0	0	0	0	0	0	0
	F	0						0.393188							0.877376				0.872912											1.37736											1.52056
	G	0	0	0	0	0	0	0	0	0	0	0	0	0	0	0	0	0	0	0	0	0	0	0	0	0	0	0	0	0	0	0	0	0	0	0	0	0	0	0	0	0	0	0	0	0	0	0	0
	H	0						0							0.0235226				0.0249992											0.0522648											0.069572
	dithiol	86
	Sectrum		Concentrations….
		Time (min)	A (μmol)	D (μmol)	F (μmol)	H (μmol)		Mass balance
	1	0	8.6	0	0	0		8.6
	2	6.28667	6.61792	2.38866	0.393188	0		9.39977
	3	12.72	5.65092	3.08369	0.877376	0.0235226		9.63551
	4	16.8533	5.4925	3.38725	0.872912	0.0249992		9.77766
	5	27.97	3.84191	3.93257	1.37736	0.0522648		9.2041
	6	39.1033	3.40511	4.08366	1.52056	0.069572		9.0789
	7	50.2033	2.68993	4.22239	1.67611	0.0818312		8.67027
	8	61.32	2.34837	4.13517	1.77158	0.0932491		8.34837
	9	72.4267	2.02237	4.05344	1.75647	0.0896263		7.92191
	10	83.5533	1.64372	4.2066	1.74239	0.0952923		7.688
								8.83245
[truncated: 37 more columns]

## Sheet: Calc
Calculated species A-H concentrations (μM between 0 and 86 min). After 86 min >80% of C6F6 had been consumed
Simulated for the chain growth and macrocycle closure process shown on sheet 'Model'; the data fitted to the 50 experimetal time-conc points are in green highlighter.
			per mL
	[dithiol]0	86	μmol	ks	0.000234918	(μM)-1 min-1
	[C6F6]	8.6	μmol	kf	0.00458499	(μM)-1 min-1
				ktemp	0.224236	(μM)-1 min-1 (min-1 for G to H)
	The volume of the NMR sample is 1mL
		Time (m)
	Species	0	1	2	3	4	5	6	7	8	9	10	11	12	13	14	15	16	17	18	19	20	21	22	23	24	25	26	27	28	29	30	31	32	33	34	35	36	37	38	39	40	41	42	43	44	45	46	47
	A	8.6	8.42625	8.25636	8.09023	7.92775	7.76884	7.6134	7.46135	7.31261	7.16708	7.0247	6.88538	6.74905	6.61563	6.48506	6.35726	6.23218	6.10973	5.98987	5.87253	5.75765	5.64518	5.53505	5.42721	5.32161	5.21819	5.11691	5.01772	4.92057	4.82542	4.73221	4.6409	4.55146	4.46384	4.37799	4.29388	4.21148	4.13074	4.05162	3.97409	3.89812	3.82368	3.75072	3.67921	3.60914	3.54045	3.47313	3.40715
	B	0	0.173746	0.274922	0.332554	0.364048	0.379857	0.386267	0.387063	0.384529	0.380039	0.374427	0.368194	0.361642	0.354955	0.348242	0.341569	0.334974	0.328478	0.322096	0.315832	0.309691	0.303671	0.297773	0.291995	0.286334	0.28079	0.275359	0.270039	0.264827	0.259722	0.254721	0.249821	0.24502	0.240317	0.235709	0.231193	0.226768	0.222433	0.218184	0.21402	0.209939	0.20594	0.20202	0.198178	0.194413	0.190722	0.187104	0.183557
	C	0	0	0.000343926	0.000742085	0.00108324	0.00133742	0.00150828	0.00161082	0.00166164	0.00167523	0.00166298	0.00163336	0.00159243	0.00154444	0.00149229	0.00143792	0.00138267	0.00132739	0.00127265	0.00121883	0.00116616	0.00111482	0.00106489	0.00101644	0.000969517	0.000924138	0.000880318	0.000838059	0.000797359	0.000758209	0.000720596	0.000684502	0.000649907	0.000616785	0.000585108	0.000554845	0.000525963	0.000498424	0.000472191	0.000447223	0.000423478	0.000400915	0.00037949	0.000359158	0.000339876	0.0003216	0.000304286	0.000287892
	D	0	0	0.0683711	0.17621	0.306227	0.448082	0.595597	0.745093	0.894389	1.04221	1.18781	1.33078	1.47092	1.60812	1.74235	1.87363	2.00201	2.12752	2.25024	2.37022	2.48754	2.60225	2.71443	2.82413	2.93142	3.03635	3.13899	3.2394	3.33763	3.43372	3.52775	3.61975	3.70977	3.79787	3.88409	3.96848	4.05107	4.13192	4.21106	4.28853	4.36438	4.43863	4.51134	4.58253	4.65224	4.72051	4.78736	4.85284
	E	0	0	0	0.000267682	0.000888076	0.00186437	0.00316708	0.00475693	0.00659475	0.00864515	0.0108773	0.0132649	0.0157852	0.0184186	0.0211476	0.0239572	0.0268335	0.0297643	0.0327381	0.0357449	0.038775	0.0418198	0.0448714	0.0479224	0.0509661	0.0539962	0.057007	0.0599933	0.0629504	0.0658739	0.0687598	0.0716045	0.0744049	0.0771578	0.0798608	0.0825114	0.0851075	0.0876474	0.0901293	0.0925519	0.0949139	0.0972144	0.0994525	0.101627	0.103739	0.105786	0.107768	0.109687
	F	0	0	0	0	0.000104924	0.000452362	0.00118039	0.00241487	0.00426572	0.00682713	0.0101791	0.0143895	0.0195156	0.0256058	0.0327006	0.0408341	0.050034	0.0603231	0.0717192	0.0842359	0.097883	0.112666	0.128589	0.145651	0.16385	0.183179	0.203632	0.2252	0.247869	0.271628	0.296462	0.322354	0.349288	0.377244	0.406204	0.436147	0.467052	0.498897	0.53166	0.565318	0.599848	0.635226	0.671428	0.708431	0.746209	0.784739	0.823997	0.863956
	G	0	0	0	0	1.60673e-08	2.148e-07	1.08171e-06	3.48755e-06	8.65187e-06	1.80534e-05	3.33288e-05	5.61819e-05	8.83104e-05	0.00013135	0.000186835	0.000256166	0.00034059	0.000441189	0.000558866	0.000694348	0.000848177	0.00102072	0.00121217	0.00142255	0.00165173	0.00189944	0.00216525	0.00244864	0.00274896	0.00306545	0.00339729	0.00374357	0.00410331	0.00447549	0.00485905	0.00525289	0.00565589	0.00606693	0.00648486	0.00690854	0.00733686	0.0077687	0.00820296	0.00863857	0.00907448	0.00950968	0.0099432	0.0103741
	H	0	0	0	0	0	3.60286e-09	5.17688e-08	2.94328e-07	1.07636e-06	3.01642e-06	7.06463e-06	1.45381e-05	2.71361e-05	4.69385e-05	7.63919e-05	0.000118287	0.000175729	0.000252101	0.000351031	0.000476349	0.000632047	0.000822238	0.00105112	0.00132293	0.00164192	0.00201229	0.00243822	0.00292374	0.00347282	0.00408923	0.00477661	0.00553841	0.00637785	0.00729796	0.00830152	0.00939109	0.010569	0.0118372	0.0131977	0.0146518	0.0162009	0.0178461	0.0195881	0.0214275	0.0233646	0.0253994	0.0275318	0.0297615
	dithiol	86	85.8263	85.6564	85.4902	85.3277	85.1688	85.0134	84.8614	84.7126	84.5671	84.4247	84.2854	84.149	84.0156	83.8851	83.7573	83.6322	83.5097	83.3899	83.2725	83.1577	83.0452	82.935	82.8272	82.7216	82.6182	82.5169	82.4177	82.3206	82.2254	82.1322	82.0409	81.9515	81.8638	81.778	81.6939	81.6115	81.5307	81.4516	81.3741	81.2981	81.2237	81.1507	81.0792	81.0091	80.9405	80.8731	80.8071
[truncated: 37 more columns]

## Sheet: Diff
Differences between observed and calculated species A-H concentrations (μM between 0 and 86 min). After 86 min >80% of C6F6 had been consumed
The differences (green highlighter) between the 50 experimetal time-conc points and their calculated values was minimised by Solver allowing only ks, kf, and ktemp to vary
			per mL
	[dithiol]0	86	μmol	ks	0.000234918	(μM)-1 min-1
	[C6F6]	8.6	μmol	kf	0.00458499	(μM)-1 min-1
				ktemp	0.224236	(μM)-1 min-1 (min-1 for G to H)
	The volume of the NMR sample is 1mL
		Time (m)
	Species	0	1	2	3	4	5	6	7	8	9	10	11	12	13	14	15	16	17	18	19	20	21	22	23	24	25	26	27	28	29	30	31	32	33	34	35	36	37	38	39	40	41	42	43	44	45	46	47
	A	0						-0.99548							-0.964711				-0.617236											-1.07866											-0.568983
	B
	C
	D	0						1.79306							1.47558				1.25973											0.594941											-0.204868
	E
	F	0						0.392008							0.85177				0.812589											1.12949											0.955238
	G								0	0	0	0	0	0	0	0	0	0	0	0	0	0	0	0	0	0	0	0	0	0	0	0	0	0	0	0	0	0	0	0	0	0	0	0	0	0	0	0	0
	H	0						-5.17688e-08							0.0234757				0.0247471											0.048792											0.0549202
	dithiol	86
[truncated: 38 more columns]

## Sheet: ExactLaws
Disappearance of C6F6 (A) behaviour by exact integrated rate law [see: Billo, E. J. Excel for Chemists: A Comprehensive Guide, 3rd Ed., John Wiley & Sons, Inc., New York 2011]
The Solver fitted parameters are highlighted in yellow, the SolvStat derived errors and fit in green
					[A](t =0)	8.6	μM
					k1obs	0.00467355	min-1
For: Rate = k1obs[A] + k2obs[A]2					k2obs	0.00195315	(μM)-1 min-1
Spectrum	Time (min)	[A]obs (μM)	[A]calc (μM)	(Obs-Calc)^2
1	0	8.6	8.6	0
2	6.28667	6.61792	6.91237	0.0867022
3	12.72	5.65092	5.72751	0.00586592
4	16.8533	5.4925	5.14656	0.119674
5	27.97	3.84191	4.01221	0.0290015
6	39.1033	3.40511	3.25529	0.0224473
7	50.2033	2.68993	2.717	0.000732406
8	61.32	2.34837	2.31345	0.00121896
9	72.4267	2.02237	2.00074	0.000468001		k-values, std. dev., R2
10	83.5533	1.64372	1.75098	0.011505		0.00467355	0.00195315
						0.00280709	0.000296351
				0.277615		0.994183	0.186284
Using Solver the fit to rate = k1obs[A] + k2obs[A]2 (R2 = 0.994) was superior to that for simple second (R2 = 0.991) and first (R2 = 0.967) order kinetic laws
Appearance of HSC6H4SC6F4SC6H4SH (D) behaviour by exact integrated rate law [see: Billo, E. J. Excel for Chemists: A Comprehensive Guide, 3rd Ed., John Wiley & Sons, Inc., New York 2011]
The Solver fitted parameters are highlighted in yellow, the SolvStat derived errors and fit in green
Due to further consumption of (D) in cascade processes, only the forst 28 min of the reaction could be modelled to [D] = 3.9 micromolar, by first order kinetics
					[D](t =inf)	3.89694	μM
For: Rate = k3obs[D]					k3obs	0.136027	min-1
Spectrum	Time (min)	[A]obs (μM)	[A]calc (μM)	(Obs-Calc)^2
1	0	0	0	0
2	6.28667	2.38866	2.2399	0.0221294
3	12.72	3.08369	3.20626	0.0150229
4	16.8533	3.38725	3.5033	0.0134676		k-values, std. dev., R2
5	27.97	3.93257	3.81017	0.0149799			0.136027
							0.0179332
						0.993161	0.147874
				0.0655999
Comparison against acyclic model compound 7 (uncatalysed reaction), Scheme S217
					[7]initial	9.8896	μM
					k (min-1)	0.0168401	min-1
	Time (min)	[7]obs	[7]calc	delta^2													Acyclic model
	3.25333	9.7	9.36235	0.114005
	9.37	8.37601	8.44599	0.00489671
	15.4867	7.39232	7.61931	0.0515229		k-values, std. dev., R2
	21.6033	6.59583	6.87355	0.0771263		9.8896	0.0168401
	27.72	6.04159	6.20078	0.025341		0.220718	0.000990158
	33.8367	5.59904	5.59386	2.68036e-05		0.98097	0.253209
	39.9533	5.16645	5.04635	0.0144244
	46.07	4.86442	4.55242	0.0973441													In presence of NMe4F.4H2O rate ≥25x faster
																	(intital rate, see ESI text)
				0.384687

## Sheet: nmol-vs-time
Conversion factor				1 integration unit is			2.74716	nmol
				Signal 1			Signal 2		Signal 3			Signal 4		Signal 5			Signal 6		Signal 7		Signals 6+7 assigned to:		Signal 8			Signal 9			Signal 10
				free and bound F-			py.HF			C6F6 = A		small imp.		HSC6H4SC6F4SC6H4SH = C			broad		broad		HSC6H4SC6F4SC6H4C6F4SC6H4SH		small imp (m)			templated macrocycle			small imp (m)
Spectrum	File and absolute time	Time rel. (min)	Time rel. (Sec)	"around -170.8 ppm"			"around -169.8"		"around -162.6"			"around -133.0"		"around -132.8"			"around -132.3"		"around -132.2"		(8F in two enviroments) = F		"around -132.0"			"around -131.85"			"around -132.8"
				Int.	nmol F-	n mol NMe4F	Int.	Ht.	Int.	nmol F-	n mol C6F6	Int.	Ht.	Int.	nmol F-	nmol C	Int.	Ht.	Int.	Ht.	nmol F-	n mol F	Int.	Ht.	nmol F	Int.	nmol F-	nmol H	Int.	Ht.	nmol F
1	2021-03-11T09:44:18 (prior to addition thiol at 09:55)	0	0	0	0	0	0	0	18783	51600	8600	0	0	0	0	0	0	0	0	0	0	0	0	0	0	0	0	0	0	0	0
2	2021-03-11T10:00:31	6.28667	377.2	7899	21699.9	21699.9	0	0	14454	39707.5	6617.92	0	0	3478	9554.64	2388.66	634	2.8	511	2.4	3145.5	393.188	0	0	0	0	0	0	0	0	0
3	2021-03-11T10:06:57	12.72	763.2	7374	20257.6	20257.6	0	0	12342	33905.5	5650.92	0	0	4490	12334.8	3083.69	1341	5.3	1214	5.1	7019.01	877.376	58	2.6	159.336	137	376.362	23.5226	60.5	3.1	166.203
4	2021-03-11T10:11:05	16.8533	1011.2	8215	22568	22568	0	0	11996	32955	5492.5	0	0	4932	13549	3387.25	1375	5.8	1167	5.5	6983.29	872.912	0	0	0	145.6	399.987	24.9992	45.8	3	125.82
5	2021-03-11T10:22:12	27.97	1678.2	8622	23686.1	23686.1	0	0	8391	23051.5	3841.91	0	0	5726	15730.3	3932.57	2056	8.5	1955	8.4	11018.9	1377.36	121.7	4	334.33	304.4	836.237	52.2648	144.1	6.4	395.866
6	2021-03-11T10:33:20	39.1033	2346.2	9979	27414	27414	0	0	7437	20430.7	3405.11	0	0	5946	16334.6	4083.66	2264	9.5	2164	9.9	12164.4	1520.56	99.5	4.4	273.343	405.2	1113.15	69.572	192.9	8.5	529.928
7	2021-03-11T10:44:26	50.2033	3012.2	10500	28845.2	28845.2	0	0	5875	16139.6	2689.93	0	0	6148	16889.6	4222.39	2511	10.4	2370	11	13408.9	1676.11	135.2	5.2	371.417	476.6	1309.3	81.8312	216.6	9.9	595.036
8	2021-03-11T10:55:33	61.32	3679.2	11136	30592.4	30592.4	0	0	5129	14090.2	2348.37	0	0	6021	16540.7	4135.17	2638	11	2521	11.7	14172.6	1771.58	159.3	6.1	437.623	543.1	1491.99	93.2491	234.4	11.2	643.935
9	2021-03-11T11:06:40	72.4267	4345.6	12199	33512.7	33512.7	0	0	4417	12134.2	2022.37	0	0	5902	16213.8	4053.44	2753	11.1	2362	11.5	14051.7	1756.47	137	6	376.362	522	1434.02	89.6263	270.8	10.4	743.932
10	2021-03-11T11:17:47	83.5533	5013.2	11988	32933	32933	0	0	3590	9862.32	1643.72	0	0	6125	16826.4	4206.6	2736	10.7	2338	11.3	13939.1	1742.39	151.7	5.8	416.745	555	1524.68	95.2923	218.7	9.1	600.805
				There are about 2 micromols of 'non generated' F- generated in the first 6 mins indicating a maximum soluble NMe4F.4H2O concentration of 2 micromols in HF.pyridine
				Ksp (NMe4F.4H2O in pyridine)			4e-12	M2

## Sheet: Experimental
This is the primary data supporting Section 8 and 8.1 of the Electronic Supporting Information (ESI pdf)
Experimental
	For one-pot reaction
	The amounts of each compound used:
	C6F6 = 1.6 mg, 0.0086 mmol							8600	nmol
	1,4-dithiobenzene 12 mg, 0.086 mmol							86000	nmol
	NMe4+F- = 20 mg, 0.12 mmol							120000	nmol
	pyridine (1 mL)
	The first specrum was just C6F6 in pyridine, then 1,4-dithiobenzene and the template (NMe4F.4H2O) , the mixture was then given a quick shake (because the template isn't that soluble) and the kinetics clock started
	For control reaction using 7
	The amounts of each compound used:
	PhSC6F5 (7) = 2.7 mg, 9.8 μmol
	Thiophenol = 10 µL, 10.8 mg, 98 μmol
	pyridine (1 mL)
