# Supplementary material for: Catalysis enabled synthesis, structures, and reactivities of fluorinated S8-corona[n]arenes (n = 8–12)
Source: Chem Sci. 2022 Nov 16;14(1):70–7. doi: 10.1039/d2sc05348a (PMC9769089; doi:10.1039/d2sc05348a)
Supplement: SC-014-D2SC05348A-s003 [file SC-014-D2SC05348A-s003.xlsx]

## Sheet: All Spectra
This is the primary data supporting Section 6 of the Electronic Supporting Information (ESI .pdf)
CHCl3 Guest (Replicate 1)					Concentration of macrocycle = 10.4 µM in THF (200 ppm water (11.1 mM), 3.00 mL total volume); neat CHCl3 used (112 ppm water, 6.2 mM). A total of 155 µL of chloroform was added (62000 equivalents w.r.t. macrocycle, and 31 equivalents of water).
	before each spectrum added…
Guest aliquot added:	(+0 µM)	(+5 µM)	(+5 µM)	(+5 µM)	(+10 µM)	(+10 µM)	(+10 µM)	(+20 µM)	(+40 µM)	(+50 µM)																	[Macro]	[CHCl3]	[Guest]/[Host]	A295
Wavelength (nm)	Abs (1)	Abs (2)	Abs (3)	Abs (4)	Abs (5)	Abs (6)	Abs (7)	Abs (8)	Abs (9)	Abs (10)																	1.04e-05	0	0	0.530421
250	0.34331	0.333275	0.327026	0.317929	0.310681	0.308307	0.304331	0.303214	0.310452	0.308409																	1.03827e-05	0.0207553	1999.03	0.533735
251	0.363474	0.354296	0.348899	0.3399	0.333132	0.330935	0.327445	0.325946	0.331975	0.328806																	1.03654e-05	0.0414416	3998.05	0.538216
252	0.384613	0.376007	0.371083	0.362745	0.356191	0.354425	0.351005	0.349796	0.354843	0.350527																	1.03483e-05	0.0620593	5997.08	0.540095
253	0.406815	0.39884	0.394255	0.386578	0.380309	0.378671	0.375923	0.374628	0.378939	0.373631																	1.0314e-05	0.10309	9995.13	0.542056
254	0.4298	0.422386	0.418372	0.41121	0.405524	0.404063	0.401819	0.400503	0.404046	0.398084																	1.02801e-05	0.143851	13993.2	0.545673
255	0.453099	0.446495	0.44303	0.436444	0.431281	0.430118	0.428214	0.42688	0.429942	0.422992																	1.02463e-05	0.184344	17991.2	0.550566
256	0.47702	0.471063	0.468224	0.461992	0.457169	0.45644	0.45514	0.453801	0.456233	0.448516																	1.01794e-05	0.264537	25987.3	0.551495
257	0.500891	0.495538	0.493307	0.487605	0.483305	0.482749	0.481973	0.480789	0.482631	0.474295																	1.00483e-05	0.421824	41979.6	0.550726
258	0.523891	0.519232	0.51737	0.512346	0.508297	0.508187	0.507737	0.50689	0.50826	0.499386																	9.88906e-06	0.612824	61969.8	0.541856
259	0.546612	0.542344	0.541152	0.536771	0.533199	0.533408	0.533782	0.532671	0.533657	0.524139
260	0.567972	0.564506	0.563813	0.559806	0.556776	0.557299	0.557981	0.557059	0.557751	0.547756
261	0.58739	0.584616	0.584344	0.580941	0.578168	0.578981	0.580086	0.579249	0.579729	0.569196
262	0.605479	0.603096	0.603468	0.600351	0.598055	0.599297	0.600784	0.600154	0.600309	0.589451
263	0.621357	0.619332	0.620314	0.617943	0.615731	0.61717	0.619127	0.618569	0.618529	0.607468
264	0.63485	0.633575	0.634716	0.632583	0.630866	0.632685	0.635097	0.63462	0.634547	0.62298
265	0.64576	0.645006	0.64644	0.64479	0.643359	0.645461	0.64825	0.647969	0.647538	0.635979
266	0.65336	0.652917	0.655033	0.653405	0.652441	0.654736	0.657701	0.657631	0.657153	0.645421
267	0.657663	0.657303	0.659756	0.65876	0.657877	0.660608	0.663901	0.663942	0.66339	0.651531
268	0.658246	0.65867	0.661015	0.660466	0.66009	0.662965	0.666575	0.666345	0.666143	0.654143
269	0.655803	0.656498	0.659223	0.658944	0.658497	0.661406	0.665161	0.665639	0.664899	0.653296
270	0.650583	0.651481	0.654633	0.654333	0.654271	0.657374	0.66145	0.661777	0.661013	0.649512
271	0.643589	0.644825	0.647946	0.648161	0.648348	0.651268	0.655623	0.65595	0.655374	0.643753
272	0.635386	0.636935	0.640242	0.640607	0.641125	0.644134	0.648578	0.649069	0.648466	0.636998
273	0.626178	0.628004	0.631483	0.632033	0.632634	0.635905	0.640186	0.640923	0.64033	0.629031
274	0.615791	0.617694	0.6214	0.622052	0.622929	0.626301	0.630815	0.631449	0.630783	0.619652
275	0.604135	0.606077	0.609785	0.610627	0.611469	0.614941	0.619614	0.620296	0.619687	0.608887
276	0.591826	0.594033	0.59777	0.598806	0.599859	0.603187	0.607835	0.608696	0.60813	0.597354
277	0.580127	0.582695	0.586562	0.587858	0.588872	0.592392	0.597105	0.597994	0.597417	0.58682
278	0.570417	0.572803	0.576739	0.578041	0.57948	0.582855	0.587734	0.588545	0.58794	0.577652
279	0.562666	0.565431	0.569421	0.570749	0.572056	0.575477	0.580443	0.58136	0.580592	0.570422
280	0.557042	0.559943	0.563895	0.565447	0.56675	0.570368	0.575207	0.576135	0.575594	0.565622
281	0.552724	0.555673	0.560146	0.561501	0.562863	0.566579	0.571461	0.572378	0.571712	0.561819
282	0.549065	0.552092	0.556394	0.557863	0.559486	0.563111	0.568217	0.569025	0.568442	0.55866
283	0.545396	0.548176	0.552714	0.554408	0.556084	0.559541	0.564736	0.565734	0.565146	0.555311
284	0.541244	0.544421	0.548864	0.550364	0.552241	0.555882	0.560959	0.561893	0.561441	0.551565
285	0.537652	0.540969	0.545358	0.547231	0.548865	0.552483	0.557806	0.558637	0.55788	0.54836
286	0.535535	0.538734	0.543254	0.544785	0.546989	0.550452	0.555645	0.556525	0.555904	0.546388
287	0.534465	0.537741	0.542195	0.544106	0.546109	0.549597	0.554729	0.555629	0.55516	0.545535
288	0.534494	0.537987	0.542512	0.544389	0.546283	0.549855	0.555051	0.555812	0.555262	0.545814
289	0.535014	0.538455	0.542924	0.545025	0.546833	0.550365	0.555475	0.55636	0.555803	0.546616
290	0.53541	0.538737	0.543339	0.545154	0.547162	0.550636	0.555737	0.556567	0.556028	0.546968
291	0.535231	0.538746	0.543194	0.54499	0.547002	0.550675	0.555795	0.556509	0.555886	0.546685
292	0.534809	0.53808	0.542706	0.544687	0.546632	0.550066	0.555073	0.556132	0.555288	0.546236
293	0.534039	0.537415	0.541936	0.543854	0.545654	0.549253	0.554225	0.555119	0.554447	0.545399
294	0.532445	0.535763	0.540313	0.542254	0.544037	0.547666	0.552757	0.553547	0.553002	0.544034
295	0.530421	0.533735	0.538216	0.540095	0.542056	0.545673	0.550566	0.551495	0.550726	0.541856
296	0.527439	0.530844	0.535247	0.53721	0.539125	0.54265	0.547444	0.548387	0.547658	0.538675
297	0.523611	0.526974	0.531381	0.533493	0.535458	0.538592	0.543764	0.544523	0.543686	0.534846
298	0.519199	0.522764	0.527138	0.529021	0.530629	0.534172	0.539205	0.539986	0.539323	0.530605
299	0.514736	0.517788	0.522251	0.524143	0.526133	0.529427	0.534134	0.535037	0.534332	0.525768
300	0.50963	0.512979	0.51715	0.519044	0.521072	0.524303	0.529261	0.529833	0.528952	0.520468
301	0.504209	0.507652	0.511876	0.513365	0.51525	0.518638	0.523596	0.52432	0.523429	0.515229
302	0.498547	0.501723	0.505859	0.507684	0.509663	0.512755	0.517524	0.518457	0.517548	0.509369
303	0.492322	0.495412	0.499471	0.501231	0.503332	0.506504	0.511172	0.511815	0.510958	0.503082
304	0.485832	0.488933	0.493139	0.494737	0.496578	0.499816	0.504231	0.505028	0.50439	0.496298
305	0.479068	0.482346	0.486189	0.487809	0.489571	0.492744	0.497235	0.498072	0.497131	0.489404
306	0.471847	0.474696	0.478729	0.480346	0.482101	0.485089	0.489749	0.49034	0.489594	0.481799
307	0.463582	0.466586	0.470568	0.472092	0.473628	0.476882	0.481056	0.481956	0.481231	0.473588
308	0.454775	0.457577	0.461444	0.462852	0.464624	0.467782	0.471867	0.472765	0.471988	0.464558
309	0.445047	0.447978	0.451737	0.453159	0.455003	0.457703	0.461971	0.462432	0.462076	0.454506
310	0.435013	0.437758	0.441531	0.442875	0.444527	0.44731	0.451409	0.452192	0.451446	0.444391
311	0.424232	0.427046	0.430636	0.431968	0.433677	0.436505	0.440405	0.440932	0.440413	0.433615
312	0.412881	0.415501	0.418983	0.420486	0.421902	0.424539	0.428662	0.42908	0.42847	0.421806
313	0.400701	0.403177	0.406555	0.408108	0.409424	0.412236	0.416055	0.416402	0.415869	0.40945
314	0.388216	0.390488	0.39392	0.394968	0.396578	0.399221	0.402982	0.403495	0.403115	0.396789
315	0.375398	0.377766	0.380961	0.382073	0.383804	0.386276	0.389724	0.390352	0.389786	0.383857
316	0.36205	0.364334	0.367336	0.368467	0.37004	0.372295	0.375881	0.376247	0.375806	0.370273
317	0.348116	0.350321	0.353161	0.354267	0.355626	0.358084	0.361552	0.361884	0.361526	0.355854
318	0.334075	0.336173	0.339098	0.340196	0.341619	0.343862	0.347195	0.347648	0.347123	0.341851
319	0.319881	0.322016	0.324736	0.325581	0.32718	0.32915	0.332524	0.332603	0.33249	0.32752
320	0.30561	0.307578	0.310251	0.311255	0.31242	0.314269	0.317647	0.317828	0.31774	0.312823
321	0.291406	0.293115	0.295796	0.296539	0.297616	0.299549	0.302469	0.302729	0.302588	0.298178
322	0.276653	0.278258	0.280839	0.281743	0.282805	0.284545	0.28755	0.287682	0.287735	0.283274
323	0.262424	0.26403	0.26636	0.267118	0.268268	0.269885	0.272702	0.272744	0.272822	0.268899
324	0.2488	0.250423	0.252606	0.253307	0.25437	0.255899	0.258497	0.258628	0.258702	0.254896
325	0.23389	0.235215	0.237496	0.23785	0.238951	0.240507	0.243047	0.243251	0.243204	0.239601
326	0.220034	0.221183	0.223311	0.223834	0.224819	0.226314	0.228817	0.228605	0.228904	0.225738
327	0.205986	0.207187	0.209123	0.209694	0.210653	0.211752	0.214394	0.214125	0.21462	0.211338
328	0.192291	0.193716	0.195547	0.195983	0.196831	0.19792	0.200281	0.200199	0.200515	0.197557
329	0.179026	0.18031	0.182124	0.182733	0.183402	0.184368	0.186721	0.186448	0.187064	0.184285
330	0.166282	0.167461	0.16898	0.169304	0.17027	0.171151	0.173268	0.173009	0.173664	0.170996
331	0.153789	0.154687	0.156415	0.156518	0.157121	0.158033	0.160426	0.15993	0.160398	0.158252
332	0.141593	0.142424	0.143943	0.144205	0.144915	0.145788	0.147644	0.147239	0.147892	0.145845
333	0.129696	0.130498	0.132003	0.132109	0.132935	0.133583	0.13552	0.13512	0.135827	0.13387
334	0.118933	0.119612	0.120954	0.120982	0.121632	0.122436	0.124333	0.123926	0.124519	0.122831
335	0.108414	0.109183	0.110431	0.110369	0.11109	0.111712	0.113509	0.112965	0.113761	0.112338
336	0.0983578	0.0990704	0.100335	0.100296	0.100962	0.101507	0.103107	0.102555	0.103551	0.102161
337	0.0892048	0.0897522	0.0909427	0.0909918	0.0915219	0.0919993	0.0935158	0.0930931	0.093983	0.0926402
338	0.0806144	0.0810549	0.0822453	0.0822235	0.082813	0.0832425	0.0847748	0.0841778	0.0850556	0.0840363
339	0.0726377	0.0730032	0.0741008	0.0740362	0.0746156	0.0750537	0.0762598	0.0757477	0.076835	0.075985
340	0.0665448	0.0667876	0.067942	0.0676783	0.0681603	0.0685591	0.069854	0.0693801	0.0704887	0.0695131
341	0.0597076	0.0600539	0.061232	0.0607743	0.0614017	0.0617346	0.0630283	0.0623598	0.0633919	0.0626779
342	0.0538226	0.0540682	0.05514	0.0546387	0.0552599	0.0557333	0.0567617	0.0561988	0.0573432	0.0567612
343	0.0483444	0.0485884	0.0495457	0.049302	0.0498002	0.0499903	0.0510784	0.0505987	0.0516267	0.0510609
344	0.0435449	0.0437002	0.0446077	0.0444417	0.0447307	0.0449882	0.0460676	0.0453287	0.0465089	0.0463114
345	0.0390407	0.0393401	0.0403832	0.0399313	0.0403182	0.0403952	0.0414773	0.040934	0.0420644	0.0417992
346	0.0350997	0.0353237	0.0363538	0.0359112	0.0363197	0.0366016	0.0374949	0.0368262	0.0380193	0.0376884
347	0.0317335	0.0316436	0.0325851	0.0320476	0.0326038	0.0327688	0.0337577	0.0331941	0.0343793	0.0341706
348	0.0284602	0.0287472	0.0296997	0.0291116	0.0293741	0.0295126	0.0304847	0.0298342	0.0311234	0.0309106
349	0.0256914	0.0258992	0.0266296	0.0262381	0.0264812	0.0266664	0.0275352	0.0270723	0.0282705	0.0281801
350	0.0232137	0.023411	0.0243573	0.0239209	0.0242807	0.0243256	0.0252506	0.0247706	0.0260075	0.025888
351	0.0212466	0.0213512	0.022223	0.0215732	0.0221616	0.0221053	0.023057	0.0224341	0.0234643	0.0235737
352	0.0193666	0.0193799	0.0201351	0.0196883	0.0200219	0.020147	0.0209875	0.0203603	0.0213818	0.0215454
353	0.0173542	0.0174544	0.0182259	0.0180224	0.0182371	0.0182604	0.0190527	0.0185345	0.0195959	0.0196629
354	0.0158012	0.0159541	0.0166892	0.0161145	0.0165811	0.0167273	0.017434	0.0167787	0.0180609	0.0181427
355	0.0143889	0.0144337	0.0152391	0.0147377	0.0149646	0.0148037	0.0158181	0.0152245	0.0165749	0.0165414
356	0.0128805	0.0130389	0.0139497	0.0132664	0.0137398	0.0137102	0.0144377	0.0139281	0.0152953	0.0153272
357	0.0118856	0.0122475	0.0128348	0.0124035	0.0128036	0.012792	0.0135537	0.013011	0.0142988	0.0142034
358	0.0111067	0.0110514	0.0118003	0.0113093	0.0116982	0.0116272	0.0124666	0.0117394	0.0130492	0.01336
359	0.00999865	0.00991451	0.010686	0.0101829	0.0105181	0.010658	0.0113201	0.0108818	0.0120153	0.012176
360	0.00915976	0.00915153	0.00986926	0.00941405	0.00977786	0.00978192	0.0105009	0.0098754	0.0108808	0.0113516
361	0.00840269	0.00804632	0.00891271	0.00850387	0.00890345	0.00887537	0.00944716	0.0088141	0.0101462	0.0102763
362	0.00736057	0.00711195	0.00814298	0.00753417	0.00801223	0.00797331	0.0083496	0.00792814	0.00906533	0.00941333
363	0.00646686	0.00647481	0.00729556	0.0066762	0.00713373	0.0070416	0.00792408	0.00719602	0.00847544	0.00888586
364	0.00596994	0.00573888	0.00670821	0.0057754	0.00638252	0.00626928	0.00684732	0.00624979	0.00772945	0.00834197
365	0.00533818	0.00507965	0.00589239	0.00548058	0.00557409	0.00566094	0.00626334	0.00551046	0.00691327	0.00771294
366	0.00435237	0.00421657	0.00523905	0.00435846	0.00503803	0.00481874	0.00524661	0.00508397	0.00633117	0.00689401
367	0.00329168	0.00311777	0.00424118	0.0030623	0.00408136	0.00405886	0.00488353	0.00403542	0.00577405	0.00627297
368	0.00245948	0.00229026	0.00316057	0.00261264	0.00291025	0.00289257	0.00390483	0.00287304	0.00495707	0.0056353
369	0.00191611	0.00180261	0.00252561	0.00212218	0.00217509	0.00190605	0.00293461	0.00232389	0.00402444	0.00481735
370	0.00175812	0.00146595	0.00232873	0.00189362	0.00203223	0.00199377	0.00256973	0.0020238	0.00326165	0.0044486
371	0.00100219	0.00115467	0.00177751	0.00103279	0.00139296	0.00148097	0.00195021	0.0014275	0.00277816	0.0037294
372	0.000419038	0.00038952	0.00128308	0.000658924	0.000791744	0.000777904	0.00137214	0.000901948	0.00218697	0.00264636
373	-0.000215818	-0.000345272	0.000697369	9.02828e-05	0.00054669	0.000414091	0.000766341	0.000261567	0.00181628	0.002457
374	-0.000559026	-0.000606833	0.000425258	-0.000100594	0.000161776	0.000192657	0.000535168	-2.46829e-05	0.00129571	0.00176168
375	-0.000630597	-0.000731582	6.18484e-05	-0.000587311	-0.000368801	-0.000516538	7.34302e-05	-0.000433123	0.00101881	0.00125198
376	-0.00113728	-0.00138216	-0.000530338	-0.000897944	-0.000705616	-0.000942781	-0.000491773	-0.000815149	0.000402841	0.000856676
377	-0.00151255	-0.0015779	-0.000588493	-0.00151768	-0.0012592	-0.00140632	-0.000759855	-0.00143835	0.000101916	0.000438405
378	-0.00176836	-0.00194038	-0.00111928	-0.00195523	-0.00144238	-0.00184804	-0.00116831	-0.00153597	-0.000189021	-9.40309e-05
379	-0.00227938	-0.00254062	-0.00163982	-0.00250308	-0.0021779	-0.00229592	-0.00204436	-0.00229734	-0.00108785	-0.000378203
380	-0.00280543	-0.00297354	-0.00217654	-0.00301277	-0.00293752	-0.00282036	-0.00229487	-0.00292976	-0.00135833	-0.000953929
381	-0.00333908	-0.00343208	-0.00288513	-0.00357562	-0.00323673	-0.00317569	-0.00286915	-0.0032721	-0.00188953	-0.0015266
382	-0.00341938	-0.00377391	-0.00305054	-0.0037148	-0.00326079	-0.00319507	-0.00283623	-0.00346262	-0.00190947	-0.00162581
383	-0.00356486	-0.00383909	-0.00288881	-0.00414108	-0.00339323	-0.00354732	-0.0027203	-0.00339734	-0.00210241	-0.00196145
384	-0.00375251	-0.00399004	-0.0031266	-0.00391582	-0.00343435	-0.00383607	-0.00337252	-0.00372699	-0.00225514	-0.00200739
385	-0.00413007	-0.00426275	-0.00347463	-0.00415136	-0.00397841	-0.00397993	-0.00362267	-0.00402543	-0.00266934	-0.00222295
386	-0.0041206	-0.00429284	-0.00366083	-0.00459754	-0.00408406	-0.00407964	-0.00376818	-0.00421979	-0.00269299	-0.00229742
387	-0.00436089	-0.00443707	-0.00375587	-0.00462949	-0.00433079	-0.00449873	-0.00403035	-0.00442913	-0.00305065	-0.00263866
388	-0.00462182	-0.00488352	-0.00402519	-0.0046771	-0.00451486	-0.00456915	-0.00428346	-0.00477311	-0.00347162	-0.00290323
389	-0.00503719	-0.00509914	-0.00456554	-0.00509431	-0.00493499	-0.0052367	-0.00478715	-0.00513685	-0.00373799	-0.0032598
390	-0.00519035	-0.00561852	-0.00461869	-0.00538153	-0.00496122	-0.00513157	-0.0048119	-0.00526155	-0.0037626	-0.00320668
391	-0.00511975	-0.00533736	-0.00444104	-0.00533741	-0.00503433	-0.00522645	-0.00483132	-0.0051617	-0.00375345	-0.00333048
392	-0.00501043	-0.00552141	-0.00454129	-0.0055047	-0.00506566	-0.00529839	-0.00483863	-0.00529404	-0.00403187	-0.00356286
393	-0.00559283	-0.00591787	-0.00500708	-0.00568553	-0.00551818	-0.00557963	-0.00515893	-0.00592043	-0.0042685	-0.00377568
394	-0.00572492	-0.00609484	-0.00515929	-0.00590992	-0.00549511	-0.00585957	-0.00553382	-0.0059038	-0.00474362	-0.0040819
395	-0.00580283	-0.00600217	-0.00524377	-0.0060355	-0.00572215	-0.00596523	-0.00532899	-0.00573582	-0.00451511	-0.00404752
396	-0.00578917	-0.00585999	-0.00513427	-0.00598872	-0.00571316	-0.00587119	-0.00535434	-0.00611239	-0.00421894	-0.00392089
397	-0.00553595	-0.00601413	-0.00486831	-0.00580251	-0.00550799	-0.00590378	-0.00549856	-0.00598677	-0.00455554	-0.00390425
398	-0.0056658	-0.00608922	-0.00520817	-0.00609388	-0.00568842	-0.00602535	-0.00551368	-0.00591621	-0.00468685	-0.00401343
399	-0.0062306	-0.00642292	-0.00558932	-0.00633278	-0.00611841	-0.00619347	-0.00606269	-0.0065308	-0.00474305	-0.00448186
400	-0.00608559	-0.00637356	-0.0057245	-0.00631082	-0.00618765	-0.00637142	-0.00589579	-0.00624539	-0.00495391	-0.00451793
401	-0.00580525	-0.00603627	-0.00524389	-0.00589445	-0.00554236	-0.00592648	-0.00557594	-0.00606698	-0.00464702	-0.00414826
402	-0.00559318	-0.00580943	-0.00531775	-0.00594008	-0.00585293	-0.00596787	-0.0054848	-0.00579582	-0.00431176	-0.00397972
403	-0.00528953	-0.00594285	-0.00503936	-0.00592615	-0.00569556	-0.00580734	-0.00542572	-0.00575446	-0.0044032	-0.00400519
404	-0.00559381	-0.00599761	-0.00497151	-0.00595983	-0.00537419	-0.00582986	-0.00529679	-0.00580699	-0.00430742	-0.00370226
405	-0.00567166	-0.00599816	-0.00514776	-0.00598131	-0.00569229	-0.00590511	-0.00553239	-0.00588124	-0.00435488	-0.00394658
406	-0.00589539	-0.00622411	-0.00519838	-0.00618765	-0.00570169	-0.00599852	-0.00575349	-0.00598695	-0.00441171	-0.00435403
407	-0.00574212	-0.00613561	-0.00492949	-0.00578931	-0.00552198	-0.00579947	-0.00575123	-0.00581104	-0.00435118	-0.00387486
408	-0.00526272	-0.00542136	-0.0045498	-0.00541198	-0.00501349	-0.00521086	-0.00515071	-0.0052957	-0.00432423	-0.00361749
409	-0.00511263	-0.00555241	-0.00458259	-0.00539199	-0.00518102	-0.00525192	-0.00524935	-0.00530372	-0.00385319	-0.00340095
410	-0.00524651	-0.00566045	-0.00493464	-0.00561492	-0.00525595	-0.00542897	-0.00521525	-0.00569806	-0.00419188	-0.00345956
411	-0.00469097	-0.00519251	-0.00459204	-0.00531181	-0.00537767	-0.00551736	-0.0048703	-0.00519335	-0.00403488	-0.00377924
412	-0.00460412	-0.00518905	-0.00423921	-0.00508782	-0.00506998	-0.00514641	-0.00477302	-0.00490182	-0.00369719	-0.00324969
413	-0.00513587	-0.00551905	-0.00433499	-0.00519158	-0.00486555	-0.00516278	-0.00530131	-0.00529554	-0.00407996	-0.00339107
414	-0.00508854	-0.00504006	-0.00459004	-0.00545162	-0.00508156	-0.00530126	-0.0049666	-0.00532868	-0.00380767	-0.00317463
415	-0.00488664	-0.00529516	-0.00449314	-0.00565138	-0.00495544	-0.00520506	-0.00488533	-0.00503431	-0.00371467	-0.00334194
416	-0.00501955	-0.0048883	-0.00432252	-0.00494771	-0.00483791	-0.00529042	-0.00466907	-0.00510265	-0.00364545	-0.00333444
417	-0.00487336	-0.00525661	-0.00415725	-0.0051112	-0.00498311	-0.00494344	-0.00472662	-0.00500054	-0.00380184	-0.00324245
418	-0.00448616	-0.00496943	-0.00401462	-0.00505947	-0.0046075	-0.00482399	-0.00451805	-0.00485107	-0.00364939	-0.00299552
419	-0.00444257	-0.00476064	-0.00401526	-0.00468082	-0.00440647	-0.00462978	-0.00446784	-0.004574	-0.00335513	-0.00291376
420	-0.00414528	-0.00459194	-0.00392794	-0.00472203	-0.00433	-0.00446175	-0.00419343	-0.00464633	-0.00316367	-0.00281518
421	-0.00386422	-0.00435041	-0.00338687	-0.00433224	-0.00417928	-0.00448713	-0.00399173	-0.0042994	-0.00301967	-0.00248671
422	-0.00418026	-0.00472479	-0.00370978	-0.00469361	-0.00461281	-0.00470511	-0.00432829	-0.00469345	-0.00340009	-0.0028989
423	-0.00443967	-0.00491483	-0.0038485	-0.00474995	-0.00441277	-0.00457147	-0.00460009	-0.00479132	-0.00359749	-0.00294853
424	-0.0043125	-0.0044489	-0.00348455	-0.0046663	-0.00424291	-0.00452544	-0.00421526	-0.00484454	-0.00298825	-0.00254886
425	-0.00388438	-0.00455645	-0.00375853	-0.00471253	-0.00421379	-0.0044507	-0.00390343	-0.0045171	-0.00279964	-0.00270196
426	-0.0038536	-0.00432374	-0.00334851	-0.0043792	-0.00427659	-0.00402307	-0.00394289	-0.00428721	-0.00304586	-0.00256883
427	-0.00368244	-0.00418069	-0.00318611	-0.00421939	-0.00379987	-0.00406183	-0.0040177	-0.00409859	-0.00272358	-0.00242008
428	-0.0037229	-0.00379689	-0.00318368	-0.00404116	-0.00367153	-0.00400686	-0.00398214	-0.0041233	-0.00280347	-0.00208467
429	-0.00349745	-0.0035824	-0.00285242	-0.00390164	-0.00333635	-0.00363608	-0.00333919	-0.00377767	-0.00231873	-0.00161421
430	-0.00301243	-0.00397256	-0.00297016	-0.0037679	-0.00364952	-0.00376906	-0.00345135	-0.00364415	-0.00244984	-0.00182736
431	-0.00382436	-0.004418	-0.00314304	-0.00410178	-0.00403225	-0.00406118	-0.00386425	-0.00401784	-0.00274068	-0.0022934
432	-0.00362007	-0.00414986	-0.00297771	-0.003788	-0.00380474	-0.00396476	-0.00360011	-0.00390667	-0.00277893	-0.00235285
433	-0.00310166	-0.00309096	-0.00241472	-0.00360818	-0.00352981	-0.00338136	-0.00322512	-0.00333162	-0.00170518	-0.0013199
434	-0.00344841	-0.00350522	-0.00259408	-0.00374633	-0.0030994	-0.00327431	-0.00353913	-0.00366982	-0.00208719	-0.00139404
435	-0.000997322	-0.000790265	0.000355718	-0.000700648	-0.00044156	-0.000591122	-0.000558869	-0.000650954	0.00176513	0.00172949
436	-0.000917414	-0.000760637	0.000405259	-0.000633509	-0.000386841	-0.000553831	-0.000479444	-0.000534095	0.00171544	0.00189894
437	-0.000877871	-0.000688722	0.000455305	-0.000528569	-0.000282419	-0.000440219	-0.000483149	-0.000566398	0.00184536	0.00192343
438	-0.000760161	-0.000695203	0.00059338	-0.000505841	-0.000121673	-0.000354082	-0.000274732	-0.000382899	0.00199186	0.00206794
439	-0.000743264	-0.000556409	0.000585199	-0.000448651	-0.000185489	-0.000366025	-0.000285454	-0.000461811	0.0019924	0.00200758
440	-0.000607946	-0.000491706	0.000668339	-0.000320077	-0.000140523	-0.000260889	-0.000286423	-0.000307019	0.00202384	0.00211696
441	-0.000535007	-0.000404473	0.000740448	-0.000148866	1.20579e-05	-0.00014568	-0.000161345	-0.000232757	0.00219576	0.00219323
442	-0.000470321	-0.000264643	0.000778769	-0.000233584	4.01473e-05	-8.04341e-05	-4.40506e-05	-0.00022785	0.00214177	0.00227539
443	-0.000358725	-0.000274056	0.000936129	-0.000130587	0.000101388	3.20745e-06	-6.83251e-06	-0.000109769	0.00229709	0.00239086
444	-0.000344272	-0.000214847	0.00101233	3.95986e-05	0.000228655	0.000112704	8.36939e-05	3.83236e-05	0.00240762	0.0024828
445	-0.000293579	-0.000199826	0.00106033	7.44886e-05	0.000273226	4.5695e-05	0.000113963	-1.63521e-06	0.00241198	0.00262598
446	-0.000120953	-9.93929e-05	0.00110389	0.000169188	0.000363022	0.000238644	0.000204632	7.84389e-05	0.0025305	0.00264446
447	-3.97881e-05	6.72977e-05	0.00123349	0.000231482	0.000433315	0.000299564	0.000330367	0.000191573	0.00260401	0.00270826
448	3.50945e-05	0.000121483	0.00128178	0.000317514	0.000521555	0.000368097	0.000375699	0.00025737	0.00274875	0.00278136
449	0.000102404	0.000194441	0.00135253	0.000368364	0.000583204	0.000470081	0.000448226	0.00033535	0.00278681	0.0028253
450	0.000118946	0.000236821	0.0013952	0.000491969	0.000632871	0.000539384	0.000572175	0.000423449	0.0028899	0.00294089
451	0.000248498	0.000357979	0.00152511	0.000505459	0.00073527	0.00066142	0.0006374	0.000582635	0.00299572	0.00299513
452	0.000216504	0.000388805	0.0015633	0.00055104	0.000832836	0.000745128	0.000717271	0.000646424	0.00301787	0.00310036
453	0.000254247	0.000392287	0.00166081	0.000558774	0.000810923	0.000718645	0.000783807	0.000692732	0.00309743	0.00322372
454	0.000332119	0.000489912	0.00164197	0.000721346	0.000902353	0.000757265	0.000803298	0.000681972	0.00319738	0.0033154
455	0.00040336	0.000575917	0.0017106	0.00077483	0.000936698	0.000809317	0.000906539	0.000777252	0.00318433	0.00330921
456	0.000570857	0.000652038	0.00177367	0.000815775	0.000986361	0.000973396	0.00102781	0.000824051	0.0032105	0.00334849
457	0.000655865	0.000812493	0.00184548	0.00087458	0.0011538	0.00098845	0.00100488	0.000933747	0.00332044	0.00345715
458	0.000748788	0.000739289	0.00191485	0.000967764	0.00120887	0.00107916	0.00105807	0.000988901	0.00342726	0.00352374
459	0.000748531	0.000869805	0.00194255	0.00100389	0.0012521	0.0011659	0.00111615	0.00101608	0.00347923	0.00354785
460	0.000755017	0.000931827	0.00203104	0.0011049	0.00130996	0.00117572	0.00117063	0.00108037	0.00356099	0.00361664
461	0.000855352	0.00101526	0.00206261	0.00113551	0.00137759	0.00134409	0.00118242	0.00116513	0.00362623	0.00372785
462	0.000881713	0.00108288	0.00217217	0.00126363	0.00148626	0.00137772	0.00130015	0.00120278	0.00362971	0.00380115
463	0.000879714	0.00106689	0.00221083	0.00124897	0.00147863	0.00136429	0.00134294	0.00119907	0.00371218	0.00385858
464	0.000898058	0.00104553	0.00215801	0.00126435	0.00141842	0.00133746	0.00135902	0.001281	0.00377886	0.00390714
465	0.000969143	0.00115202	0.00226648	0.00130375	0.00156141	0.00142713	0.00140757	0.00132949	0.00379854	0.00395699
466	0.00103641	0.00115852	0.00221427	0.00143283	0.00156844	0.00150494	0.00137138	0.00136807	0.00377962	0.00394451
467	0.00110925	0.0012748	0.00226375	0.0014797	0.00163646	0.00155503	0.00151753	0.0014515	0.00386509	0.0040043
468	0.00121787	0.00137224	0.00239422	0.00154613	0.00167817	0.00161748	0.00153342	0.0014942	0.00389757	0.0040435
469	0.00121682	0.00134403	0.00241452	0.00160275	0.0017254	0.00163998	0.00161718	0.00158129	0.00398925	0.00412231
470	0.00130909	0.00143485	0.0025102	0.00165208	0.00187921	0.0017282	0.00168518	0.00162912	0.00406059	0.00421168
471	0.00135558	0.00150167	0.0025385	0.0017315	0.00189717	0.00181219	0.00173921	0.00171768	0.00407319	0.00424917
472	0.00142962	0.00157651	0.00254785	0.00177581	0.00197963	0.00192936	0.00176744	0.00174167	0.00417892	0.00433316
473	0.00148931	0.00169479	0.00261644	0.00184662	0.00200225	0.00191074	0.00184558	0.00183699	0.00420525	0.00441096
474	0.00160435	0.00165254	0.00267931	0.00187188	0.00209942	0.00200467	0.00186006	0.0019368	0.00427116	0.0044176
475	0.00163865	0.00170332	0.0027317	0.00191294	0.00207145	0.00206785	0.00197093	0.00191214	0.00437284	0.00455982
476	0.00156256	0.00176676	0.00282119	0.00198972	0.00212683	0.00204145	0.0019835	0.00191664	0.00434746	0.00454661
477	0.00158888	0.00175134	0.00281011	0.00204049	0.00223064	0.00218458	0.00200649	0.00202208	0.00445004	0.0046479
478	0.00161825	0.00174079	0.00275014	0.00190859	0.00214585	0.00204349	0.00199459	0.00190016	0.00449731	0.00470614
479	0.00170563	0.00187596	0.00283313	0.00200631	0.00220952	0.00213809	0.00211345	0.00198755	0.00450511	0.00479229
480	0.00173431	0.00191822	0.00295418	0.00208167	0.00226577	0.00220427	0.00213135	0.00210014	0.00449472	0.00472821
481	0.00187412	0.00195765	0.00294039	0.00212297	0.0023999	0.00225333	0.00213074	0.00210081	0.00458177	0.00475252
482	0.00193599	0.00203264	0.00307506	0.0022368	0.00242645	0.00232269	0.00226701	0.00227611	0.00473687	0.00484812
483	0.00197515	0.00211759	0.00306102	0.00229854	0.00243101	0.00238853	0.00230196	0.00228871	0.0046936	0.00494141
484	0.00202542	0.00216459	0.00309578	0.00234672	0.0025218	0.00242609	0.00237218	0.0022841	0.00483646	0.00494537
485	0.00210787	0.00219436	0.00322859	0.00237755	0.00253841	0.00251673	0.00241202	0.00236981	0.0048416	0.0049237
486	0.00215804	0.00221119	0.00334518	0.00239253	0.00260568	0.00254805	0.00248252	0.00237372	0.00485485	0.00501285
487	0.00218301	0.00230889	0.00324198	0.00244444	0.00264743	0.00255698	0.00249038	0.0024247	0.00485064	0.00506776
488	0.00226285	0.00238525	0.00330352	0.00256146	0.00270271	0.00257843	0.0025117	0.00248746	0.00494126	0.00511055
489	0.00231541	0.00240776	0.00339126	0.00262078	0.00273218	0.00274108	0.0026423	0.00255417	0.00502468	0.00517399
490	0.00231065	0.00238284	0.00344228	0.00258583	0.0027782	0.00268357	0.00260003	0.0025679	0.00506841	0.00519667
491	0.0023656	0.00247125	0.00349616	0.00256851	0.00284051	0.00271728	0.00268119	0.00267373	0.00505591	0.00528489
492	0.00238555	0.00254242	0.00350532	0.00272544	0.00284677	0.00286833	0.00274017	0.00267108	0.00509578	0.00533803
493	0.00243029	0.00250718	0.00347497	0.00279095	0.00289061	0.00281395	0.00271064	0.00272805	0.00514926	0.00534812
494	0.00243639	0.00252675	0.00359636	0.00280645	0.0029208	0.00293061	0.00276358	0.00267404	0.00523069	0.00538361
495	0.00239829	0.00260968	0.00359457	0.00276845	0.0029956	0.00292543	0.00281977	0.00275197	0.00523251	0.00541656
496	0.00246576	0.00247025	0.00363128	0.00278253	0.00297823	0.00291306	0.00291245	0.00276892	0.00522906	0.00543409
497	0.00247163	0.00250245	0.00353429	0.00271192	0.00287894	0.00275417	0.00274072	0.00270433	0.00531403	0.0055258
498	0.00252637	0.00253249	0.00353416	0.00274931	0.0029448	0.00286533	0.00280148	0.00274583	0.00530373	0.00550022
499	0.002628	0.00266422	0.00368056	0.00291383	0.00310903	0.00302567	0.00291715	0.0028767	0.00542535	0.0056586
500	0.0025965	0.00263927	0.00371437	0.00285416	0.00311101	0.00297955	0.00287112	0.0028022	0.00540388	0.00563103
CHCl3 Guest (Replicate 2)					Concentration of macrocycle = 10.8 µM in THF (200 ppm water (11.1 mM), 3.00 mL total volume); neat CHCl3 used (112 ppm water, 6.2 mM). A total of 155 µL of chloroform was added (59700 equivalents w.r.t. macrocycle, and 31 equivalents of water).
	before each spectrum added…
Guest aliquot added:	(+0 µM)	(+5 µM)	(+5 µM)	(+5 µM)	(+10 µM)	(+10 µM)	(+10 µM)	(+20 µM)	(+40 µM)	(+50 µM)																	[Macro]	[CHCl3]	[Guest]/[Host]	A295
Wavelength (nm)	Abs (1)	Abs (2)	Abs (3)	Abs (4)	Abs (5)	Abs (6)	Abs (7)	Abs (8)	Abs (9)	Abs (10)																	1.08e-05	0	0	0.551864
250	0.408466	0.394814	0.386415	0.382552	0.382492	0.381536	0.382448	0.385619	0.388668	0.386617																	1.0782e-05	0.0207692	1926.28	0.555447
251	0.420829	0.407924	0.400408	0.396816	0.39691	0.396118	0.396887	0.400001	0.402306	0.399187																	1.07641e-05	0.0414694	3852.56	0.562126
252	0.434843	0.422937	0.415973	0.412758	0.413237	0.412641	0.413506	0.416353	0.418036	0.414276																	1.07463e-05	0.062101	5778.84	0.568125
253	0.450592	0.439326	0.433247	0.430754	0.431513	0.430914	0.431958	0.434767	0.435881	0.431448																	1.07107e-05	0.10316	9631.41	0.574504
254	0.46803	0.457686	0.452295	0.450416	0.451342	0.451117	0.452159	0.455058	0.455803	0.450866																	1.06755e-05	0.143947	13484	0.57775
255	0.48639	0.476885	0.472451	0.470817	0.47246	0.472217	0.473544	0.476469	0.476718	0.471471																	1.06404e-05	0.184468	17336.5	0.581743
256	0.505948	0.497244	0.493431	0.492452	0.494302	0.494361	0.495954	0.498991	0.498916	0.493237																	1.0571e-05	0.264714	25041.7	0.586631
257	0.525625	0.517822	0.514816	0.514341	0.516582	0.517123	0.51874	0.521882	0.521791	0.515908																	1.04348e-05	0.422107	40451.9	0.586701
258	0.545137	0.537925	0.535719	0.535827	0.538705	0.539206	0.541213	0.544441	0.54404	0.538179																	1.02694e-05	0.613235	59714.7	0.58267
259	0.564436	0.558001	0.556663	0.557454	0.560554	0.561345	0.563476	0.567116	0.566668	0.560314
260	0.582966	0.577254	0.576783	0.577753	0.581222	0.582486	0.584863	0.588695	0.587941	0.581711
261	0.599602	0.594631	0.594807	0.596142	0.600311	0.601593	0.60456	0.608135	0.607509	0.601302
262	0.614936	0.610833	0.61162	0.613591	0.617908	0.619541	0.622545	0.626769	0.626118	0.619647
263	0.628696	0.625061	0.626495	0.628918	0.633615	0.635529	0.638805	0.64296	0.642115	0.63587
264	0.640181	0.637283	0.639327	0.642082	0.647283	0.649305	0.65262	0.657035	0.656409	0.650002
265	0.649228	0.646658	0.649595	0.652759	0.657952	0.660283	0.663828	0.668666	0.667929	0.661484
266	0.655464	0.653374	0.656528	0.660146	0.665815	0.66822	0.672068	0.676862	0.676105	0.669806
267	0.658521	0.657138	0.660676	0.66466	0.670429	0.672953	0.677071	0.681993	0.681229	0.675139
268	0.658246	0.657457	0.661463	0.665777	0.671596	0.674312	0.678355	0.683397	0.682693	0.676845
269	0.655252	0.654698	0.659066	0.6634	0.669553	0.672223	0.676486	0.681516	0.680947	0.675024
270	0.649369	0.649223	0.653981	0.658479	0.66476	0.667554	0.671852	0.677055	0.676535	0.670977
271	0.641859	0.642076	0.646834	0.651663	0.658015	0.661012	0.665256	0.670401	0.670129	0.664367
272	0.632967	0.63362	0.638632	0.64357	0.649925	0.652985	0.657354	0.662467	0.662278	0.656791
273	0.623201	0.624089	0.629488	0.634387	0.640894	0.644118	0.648231	0.653581	0.653387	0.648186
274	0.61288	0.613839	0.619373	0.624377	0.630877	0.634116	0.638294	0.643388	0.643353	0.638288
275	0.601613	0.603138	0.608788	0.613728	0.620185	0.623314	0.627703	0.632992	0.632764	0.627696
276	0.590878	0.592426	0.597966	0.603153	0.609819	0.612972	0.617097	0.622174	0.622226	0.61736
277	0.58089	0.582956	0.588528	0.593887	0.600431	0.60353	0.607857	0.612615	0.612795	0.608066
278	0.572642	0.57463	0.580491	0.585779	0.592242	0.595404	0.599652	0.604568	0.60473	0.599973
279	0.565928	0.568127	0.574006	0.579478	0.585981	0.589108	0.593162	0.598079	0.598278	0.593671
280	0.561094	0.563507	0.569571	0.575018	0.581279	0.584648	0.588922	0.593744	0.593834	0.589269
281	0.557649	0.560157	0.566472	0.571611	0.578305	0.581269	0.585711	0.590718	0.590895	0.586224
282	0.55508	0.55785	0.564049	0.569454	0.57611	0.579248	0.583385	0.588316	0.588586	0.584066
283	0.552786	0.55572	0.5621	0.567652	0.574145	0.577467	0.581748	0.586518	0.586814	0.582409
284	0.551085	0.553974	0.56046	0.566062	0.572714	0.575661	0.579946	0.584883	0.585345	0.580867
285	0.54963	0.55296	0.559351	0.565098	0.571517	0.574871	0.579025	0.583811	0.584122	0.579533
286	0.549232	0.552497	0.558992	0.564779	0.571284	0.574662	0.578882	0.583837	0.583859	0.579613
287	0.549901	0.553261	0.55969	0.565371	0.571998	0.575077	0.579586	0.584308	0.58477	0.580229
288	0.550735	0.554083	0.560953	0.56646	0.573108	0.576553	0.580692	0.585312	0.58581	0.581323
289	0.55174	0.555121	0.561981	0.567633	0.574063	0.577247	0.581697	0.586364	0.586563	0.582402
290	0.552408	0.555829	0.562779	0.568422	0.574997	0.578194	0.58235	0.587197	0.587307	0.583289
291	0.553144	0.556702	0.563492	0.569158	0.575596	0.578924	0.583179	0.587962	0.588122	0.583653
292	0.553614	0.557218	0.563965	0.569659	0.576055	0.579595	0.583672	0.588571	0.588699	0.584684
293	0.553796	0.557367	0.564063	0.569665	0.576196	0.579685	0.583794	0.588461	0.588843	0.584436
294	0.5533	0.556801	0.563625	0.569174	0.575762	0.579105	0.583338	0.587913	0.588282	0.584015
295	0.551864	0.555447	0.562126	0.568125	0.574504	0.57775	0.581743	0.586631	0.586701	0.58267
296	0.549691	0.55333	0.559885	0.565697	0.571978	0.575499	0.579466	0.584094	0.584279	0.579987
297	0.546529	0.550165	0.556878	0.562491	0.568694	0.57217	0.576216	0.580849	0.580864	0.576696
298	0.542397	0.546081	0.552986	0.558748	0.564601	0.568081	0.572156	0.576853	0.576853	0.572972
299	0.538534	0.542135	0.548543	0.554507	0.560757	0.563806	0.567973	0.57238	0.572506	0.568531
300	0.533727	0.537315	0.543974	0.549725	0.55539	0.558748	0.563014	0.56744	0.567551	0.563381
301	0.528597	0.532204	0.538685	0.544195	0.550373	0.553349	0.55732	0.561752	0.561911	0.55773
302	0.523136	0.52654	0.533156	0.53866	0.544583	0.5479	0.551885	0.555932	0.556061	0.552154
303	0.517257	0.520662	0.52721	0.532739	0.538517	0.541542	0.545558	0.550001	0.549906	0.545902
304	0.511227	0.514679	0.520901	0.526373	0.532058	0.535249	0.539062	0.543337	0.543518	0.539419
305	0.504446	0.507791	0.514046	0.519658	0.525317	0.528273	0.532071	0.536158	0.536232	0.532433
306	0.496694	0.50029	0.50624	0.511697	0.517187	0.520187	0.523921	0.528312	0.528336	0.524606
307	0.488574	0.492096	0.498052	0.503267	0.50896	0.511544	0.515217	0.519387	0.519538	0.516012
308	0.479594	0.482892	0.488679	0.493703	0.499475	0.50231	0.505916	0.509724	0.509918	0.506205
309	0.469717	0.472835	0.478668	0.483835	0.489131	0.491852	0.495583	0.499367	0.49946	0.495922
310	0.458966	0.462326	0.468222	0.47336	0.478339	0.480995	0.484385	0.488383	0.488552	0.484923
311	0.447941	0.45111	0.456396	0.461397	0.46657	0.469197	0.472495	0.476312	0.476492	0.472956
312	0.435643	0.438882	0.444079	0.448907	0.45398	0.456337	0.459823	0.463155	0.463688	0.460342
313	0.423005	0.425981	0.431186	0.435885	0.440859	0.443251	0.446357	0.449967	0.450134	0.446838
314	0.409733	0.412686	0.417557	0.422134	0.427142	0.429225	0.432387	0.435715	0.436095	0.433099
315	0.396276	0.399217	0.40388	0.408485	0.413095	0.415207	0.418176	0.421617	0.421804	0.41864
316	0.381914	0.384764	0.389373	0.393682	0.398258	0.400119	0.403275	0.406228	0.406621	0.40371
317	0.367295	0.369748	0.374339	0.378581	0.382825	0.385006	0.387829	0.390843	0.391329	0.388394
318	0.352638	0.355218	0.359355	0.363416	0.367758	0.369701	0.372395	0.3752	0.375756	0.372827
319	0.33768	0.340112	0.344278	0.348156	0.352351	0.354059	0.35662	0.359417	0.359872	0.35701
320	0.322482	0.324713	0.328703	0.332422	0.336335	0.338094	0.340456	0.343179	0.343784	0.340923
321	0.307139	0.309536	0.313228	0.316766	0.320676	0.322062	0.324425	0.327145	0.32748	0.324878
322	0.291621	0.293972	0.297556	0.301004	0.304631	0.306193	0.308261	0.310778	0.311432	0.308854
323	0.276676	0.279075	0.282291	0.28553	0.289077	0.290561	0.292596	0.294843	0.295562	0.29296
324	0.261516	0.263589	0.266729	0.26988	0.273272	0.27448	0.276477	0.278832	0.27943	0.276997
325	0.246566	0.248784	0.251575	0.254579	0.258002	0.259263	0.260971	0.263036	0.263914	0.261339
326	0.231893	0.234007	0.23695	0.239695	0.242793	0.243784	0.245568	0.247639	0.248261	0.245975
327	0.217271	0.21928	0.221782	0.22459	0.227566	0.228524	0.230103	0.232103	0.23289	0.230513
328	0.202949	0.204917	0.207181	0.209909	0.212961	0.213791	0.215009	0.216795	0.217787	0.215447
329	0.189307	0.191039	0.193403	0.19573	0.198699	0.199457	0.200527	0.202246	0.2032	0.201119
330	0.175374	0.177254	0.1793	0.181626	0.184484	0.185068	0.186107	0.187693	0.188764	0.186671
331	0.162428	0.163967	0.165975	0.168003	0.170645	0.171078	0.172263	0.173663	0.174731	0.172616
332	0.14931	0.150921	0.152767	0.154759	0.157302	0.157632	0.158676	0.160103	0.161118	0.159196
333	0.137063	0.13861	0.14028	0.142207	0.144828	0.145045	0.14602	0.147259	0.148328	0.146348
334	0.125836	0.127221	0.128665	0.130714	0.133058	0.13312	0.134029	0.135054	0.136476	0.134353
335	0.114636	0.11612	0.117339	0.119153	0.121484	0.121447	0.122148	0.123266	0.124641	0.122603
336	0.104052	0.105614	0.106892	0.108338	0.11065	0.110584	0.1114	0.112282	0.113583	0.111562
337	0.0944426	0.0958272	0.0969324	0.098373	0.100671	0.100472	0.101076	0.101924	0.103178	0.101433
338	0.0855405	0.0866905	0.0878013	0.0890726	0.0912181	0.0911389	0.0915733	0.0925264	0.0935871	0.0916805
339	0.0769731	0.0783371	0.079127	0.0803306	0.0824545	0.0822072	0.082474	0.0835076	0.0846396	0.0828447
340	0.0712181	0.0723823	0.0733229	0.0745922	0.07643	0.0761196	0.0764506	0.0770508	0.0788471	0.076867
341	0.0643024	0.06535	0.0661514	0.0671728	0.0690309	0.0687427	0.0689152	0.069631	0.0711426	0.0693229
342	0.0577353	0.0590754	0.0596838	0.0606058	0.062441	0.0619964	0.062318	0.0631741	0.0645581	0.0626287
343	0.0520043	0.0532572	0.053621	0.054472	0.0563871	0.0559513	0.0562568	0.0567715	0.0582732	0.0565209
344	0.0467403	0.04771	0.0483322	0.049289	0.050919	0.0506385	0.0505695	0.051305	0.0526408	0.0508817
345	0.0421133	0.043261	0.0436234	0.0444774	0.0460693	0.0456363	0.0456785	0.0461863	0.048022	0.0460339
346	0.037764	0.0388137	0.0392688	0.0398955	0.0416701	0.0411508	0.0412579	0.0417245	0.0432522	0.041415
347	0.033914	0.0349013	0.0352822	0.0361389	0.0380364	0.0373293	0.0372108	0.0376934	0.0394353	0.0377175
348	0.0305187	0.0318142	0.0319758	0.0327993	0.0344838	0.0336134	0.0338971	0.0343846	0.0360853	0.0342006
349	0.0279616	0.0288352	0.0292224	0.0297818	0.03144	0.0312567	0.0310874	0.0312635	0.033108	0.031249
350	0.0252608	0.0263414	0.0266149	0.0272795	0.0288317	0.0282913	0.0280404	0.0284925	0.0303147	0.028506
351	0.0228632	0.0238117	0.0240588	0.0246225	0.0264657	0.0255686	0.0255655	0.0259594	0.027829	0.0259115
352	0.0206486	0.0215558	0.0217729	0.0227011	0.0241917	0.0234566	0.0232342	0.023492	0.0252529	0.0235677
353	0.0187844	0.0194681	0.0199918	0.0206009	0.0220355	0.0212802	0.0214896	0.0216504	0.0235207	0.0216393
354	0.0171138	0.0178505	0.0180535	0.0185377	0.0201105	0.0195622	0.0191178	0.0196221	0.0212578	0.0197118
355	0.0153998	0.0163448	0.0165468	0.0170407	0.018433	0.017832	0.0176556	0.0179583	0.0195547	0.0180867
356	0.0134966	0.0147221	0.0150828	0.015414	0.0171635	0.0163086	0.0160032	0.0164924	0.0183449	0.0165097
357	0.0124253	0.0134434	0.0136472	0.0140194	0.0157555	0.015069	0.0146537	0.0148536	0.0168418	0.0150644
358	0.01069	0.0118232	0.0120688	0.0124724	0.0144172	0.0134486	0.0134156	0.0136885	0.0153361	0.0137238
359	0.00917441	0.01025	0.0102886	0.0106257	0.0130244	0.0121054	0.0118609	0.0121511	0.0140436	0.0119946
360	0.00812293	0.00921868	0.00920212	0.00937796	0.0114066	0.010234	0.00989874	0.0102187	0.0121774	0.0103975
361	0.00714574	0.00816033	0.00832495	0.00877903	0.0104197	0.00946194	0.00926542	0.00932031	0.0111618	0.00962094
362	0.00662902	0.00734259	0.00726417	0.00795206	0.00953934	0.00861689	0.00848672	0.00863546	0.0107115	0.00897196
363	0.00586845	0.00654064	0.00681291	0.00693019	0.00860709	0.00775773	0.0076115	0.00755101	0.00968917	0.00779621
364	0.00507394	0.00555162	0.00563703	0.00635209	0.00776989	0.00696986	0.00676597	0.00687249	0.0090068	0.0070699
365	0.00418487	0.00503501	0.00491818	0.00536383	0.00694978	0.00596645	0.00545405	0.00600634	0.00791532	0.00608162
366	0.00327705	0.00424646	0.00437504	0.00446848	0.00622509	0.00543474	0.00503637	0.0052308	0.00719741	0.00523176
367	0.00280104	0.0035367	0.00359022	0.00394814	0.00520024	0.00450814	0.00426101	0.00460701	0.006375	0.00462813
368	0.00199135	0.00280634	0.00279622	0.0030951	0.00477162	0.00371717	0.00333524	0.00349814	0.00558632	0.00388156
369	0.00159514	0.00210867	0.00214159	0.00252549	0.00412163	0.00334975	0.00285179	0.00286649	0.00498608	0.00332683
370	0.00109747	0.00173391	0.00176968	0.00209482	0.00365819	0.00278722	0.00248393	0.00284168	0.00451584	0.00293048
371	0.000407653	0.00125907	0.00125394	0.00179566	0.00300037	0.00199214	0.00176265	0.00198368	0.00402564	0.00201298
372	-0.000212611	0.00061643	0.000494008	0.000738602	0.0023606	0.00166791	0.00132659	0.00137592	0.00343784	0.00142712
373	-0.000734775	6.29207e-05	3.59307e-05	0.00037651	0.0017824	0.000856545	0.000627754	0.000746782	0.00270661	0.000884764
374	-0.00127845	-0.000570331	-0.000519955	-0.00032531	0.00134425	0.000234293	-1.81549e-05	0.000178663	0.0023217	0.000622534
375	-0.00177693	-0.00117574	-0.00110747	-0.000954017	0.000874509	3.07242e-05	-0.000385722	-0.000229506	0.00214311	-0.000100392
376	-0.00233062	-0.00146788	-0.00180879	-0.00145465	0.000419797	-0.000514277	-0.000763343	-0.000639135	0.00152001	-0.000391465
377	-0.00287171	-0.00202441	-0.00214154	-0.0018282	-4.62141e-05	-0.00104442	-0.00161218	-0.00140599	0.0008921	-0.00104969
378	-0.00346516	-0.00275045	-0.00295067	-0.00269296	-0.000621794	-0.00173646	-0.00198964	-0.00180808	0.00042708	-0.00143885
379	-0.00400125	-0.00288793	-0.00307281	-0.00297071	-0.00112669	-0.00208915	-0.00237822	-0.00231006	-0.000262735	-0.00210125
380	-0.00402046	-0.00333366	-0.00335175	-0.00298178	-0.00185926	-0.00272472	-0.00313523	-0.0027184	-0.000739942	-0.00252229
381	-0.00437784	-0.00384177	-0.00370423	-0.00365702	-0.00218757	-0.00296528	-0.00348185	-0.00323305	-0.00123377	-0.00294276
382	-0.0046044	-0.00411963	-0.00433705	-0.00379548	-0.00250245	-0.00332379	-0.00388263	-0.00368242	-0.00155845	-0.00333759
383	-0.0052534	-0.00442557	-0.00470208	-0.00425651	-0.00271432	-0.00373731	-0.00395587	-0.00384049	-0.00168751	-0.00341942
384	-0.00527411	-0.00451409	-0.00456485	-0.00444711	-0.0028597	-0.00391575	-0.00427202	-0.00400992	-0.00203751	-0.00364111
385	-0.00532183	-0.0046386	-0.0048522	-0.00443065	-0.00326646	-0.00411415	-0.00458501	-0.00429302	-0.0020144	-0.00411772
386	-0.00565439	-0.00488011	-0.00514499	-0.00465811	-0.00356483	-0.00432072	-0.00489058	-0.00458378	-0.00213345	-0.00438382
387	-0.00579824	-0.00520763	-0.00558483	-0.00508485	-0.00365748	-0.0045722	-0.00487089	-0.00495803	-0.0026869	-0.00451776
388	-0.00597152	-0.0053777	-0.0056784	-0.00560234	-0.00407473	-0.00512513	-0.00536263	-0.00505867	-0.00291902	-0.00463173
389	-0.00662179	-0.00599891	-0.00573361	-0.0057549	-0.00420408	-0.00516156	-0.00562276	-0.00555637	-0.00337569	-0.00507089
390	-0.00663636	-0.00590283	-0.00623836	-0.00577966	-0.00454078	-0.00525582	-0.00563162	-0.00575793	-0.00368176	-0.0053183
391	-0.00661307	-0.00592082	-0.00618915	-0.00593071	-0.00465177	-0.00536884	-0.0060694	-0.00575975	-0.00352993	-0.00542715
392	-0.00703596	-0.00591828	-0.00617528	-0.00612485	-0.00483162	-0.0055894	-0.00570495	-0.00545047	-0.00371004	-0.00535489
393	-0.00722382	-0.00657351	-0.00665875	-0.00667406	-0.00511048	-0.00590703	-0.00639372	-0.00614027	-0.00404951	-0.00597004
394	-0.00726972	-0.00672078	-0.00697875	-0.00644851	-0.00534309	-0.00659088	-0.0066573	-0.00631704	-0.00407975	-0.00608188
395	-0.00721817	-0.0064003	-0.00688967	-0.00670084	-0.00548274	-0.00611046	-0.00647874	-0.00645998	-0.00424696	-0.00617311
396	-0.0073529	-0.00704561	-0.00682322	-0.00663008	-0.0054315	-0.00625834	-0.00673196	-0.00642893	-0.00429555	-0.00592089
397	-0.00726831	-0.00643538	-0.00682407	-0.00682163	-0.00509258	-0.00622843	-0.00654441	-0.00630046	-0.00416293	-0.00609955
398	-0.0078049	-0.00645661	-0.00691268	-0.0067791	-0.00530533	-0.0061359	-0.00661719	-0.00660243	-0.00419332	-0.00610546
399	-0.0077722	-0.00696587	-0.00717799	-0.0070404	-0.0055811	-0.0065609	-0.00710343	-0.00672476	-0.0044193	-0.0065609
400	-0.00752318	-0.00693322	-0.00704251	-0.00687205	-0.00552163	-0.00628979	-0.0069137	-0.00670591	-0.00456641	-0.00618704
401	-0.00730846	-0.00647024	-0.00678786	-0.0064779	-0.0053537	-0.00611963	-0.00664439	-0.00651992	-0.00426104	-0.0060793
402	-0.00730424	-0.00639877	-0.00648782	-0.00652079	-0.00522846	-0.00607121	-0.00644413	-0.00634242	-0.00438422	-0.00573454
403	-0.00712596	-0.00644007	-0.00657634	-0.00644018	-0.0050277	-0.00582174	-0.00625934	-0.00616336	-0.00399424	-0.00594118
404	-0.00709011	-0.00605104	-0.00641963	-0.00617703	-0.00490155	-0.00584571	-0.00627549	-0.00589495	-0.00374465	-0.00552684
405	-0.00695296	-0.00626503	-0.00659505	-0.00619811	-0.00484953	-0.00576965	-0.00627625	-0.00594339	-0.00385072	-0.00558288
406	-0.00667102	-0.00624103	-0.00659451	-0.00638899	-0.00503413	-0.00584199	-0.00643784	-0.00643101	-0.00409399	-0.00565355
407	-0.00682946	-0.00635144	-0.00630397	-0.00627077	-0.00488844	-0.00584037	-0.00626333	-0.00625339	-0.00343725	-0.00570853
408	-0.00609259	-0.00544456	-0.00585564	-0.00547087	-0.00398061	-0.00520194	-0.00558615	-0.00530855	-0.0032484	-0.00500301
409	-0.00614519	-0.0053024	-0.00576948	-0.00531987	-0.00414356	-0.00501679	-0.00558235	-0.0054407	-0.00310734	-0.00497587
410	-0.00591197	-0.0055192	-0.00548495	-0.00559466	-0.00449925	-0.00491691	-0.00559076	-0.00545336	-0.00324127	-0.00490216
411	-0.00587661	-0.00516795	-0.00553698	-0.00532813	-0.00382721	-0.0049159	-0.005447	-0.00519249	-0.00308732	-0.00490532
412	-0.0057664	-0.00476917	-0.00513552	-0.00518005	-0.00359853	-0.00461459	-0.00492482	-0.00507402	-0.0027469	-0.0044182
413	-0.0058701	-0.00499038	-0.00513047	-0.00506942	-0.0038888	-0.0047842	-0.00515473	-0.0047798	-0.00253256	-0.00472037
414	-0.00581603	-0.00500335	-0.0052366	-0.00516298	-0.00365487	-0.00477522	-0.0052046	-0.00525068	-0.002865	-0.0047398
415	-0.00539271	-0.00522036	-0.00517673	-0.00510405	-0.0037038	-0.0045972	-0.00510327	-0.00490721	-0.00266593	-0.00430589
416	-0.00540315	-0.00456833	-0.00487051	-0.004846	-0.00358075	-0.00443815	-0.00486973	-0.00449488	-0.0026864	-0.00450046
417	-0.0052724	-0.00460795	-0.00507976	-0.00479193	-0.00329661	-0.00436661	-0.00458801	-0.00454979	-0.00257905	-0.00430178
418	-0.00512157	-0.00454008	-0.0050103	-0.00460817	-0.00336722	-0.00405372	-0.00448174	-0.00438242	-0.00226627	-0.00397044
419	-0.00504545	-0.00439766	-0.00449597	-0.00459159	-0.00330769	-0.00401693	-0.0046015	-0.00407751	-0.00207725	-0.00366666
420	-0.00487722	-0.00416204	-0.00456153	-0.00461107	-0.00328713	-0.00378052	-0.00449873	-0.00408083	-0.00212393	-0.00394415
421	-0.00477759	-0.00426587	-0.00461676	-0.00439839	-0.00296317	-0.00385177	-0.00439689	-0.00427362	-0.00210905	-0.00358995
422	-0.00510837	-0.00430351	-0.0047055	-0.00448384	-0.00295082	-0.00432659	-0.00434242	-0.00432709	-0.00216807	-0.00420509
423	-0.00503183	-0.00408553	-0.00477665	-0.00427351	-0.00322341	-0.00394451	-0.00437007	-0.00411744	-0.00183437	-0.00417131
424	-0.00475708	-0.00393083	-0.00410577	-0.00411062	-0.0027782	-0.00351923	-0.00441922	-0.00399716	-0.00144681	-0.00342748
425	-0.00432974	-0.0037916	-0.0039937	-0.00383887	-0.00266065	-0.00355565	-0.00409767	-0.00393853	-0.00182842	-0.0032028
426	-0.00408831	-0.00361533	-0.0039574	-0.00398635	-0.00226714	-0.00339628	-0.00363632	-0.00361946	-0.0015492	-0.00317468
427	-0.0040807	-0.00319723	-0.00374586	-0.00316823	-0.00225648	-0.00325036	-0.00313191	-0.0030857	-0.000896467	-0.00317533
428	-0.00408925	-0.00343835	-0.00373012	-0.00356472	-0.00233388	-0.00299484	-0.00354964	-0.00324766	-0.000915921	-0.00317128
429	-0.0038859	-0.00340876	-0.00368574	-0.00338692	-0.00227252	-0.00249387	-0.00361015	-0.00333659	-0.000925969	-0.00263667
430	-0.00371568	-0.00328291	-0.00363752	-0.00347335	-0.00207033	-0.00260044	-0.00335861	-0.00317507	-0.00116258	-0.00271183
431	-0.00411546	-0.00360161	-0.00369333	-0.00326434	-0.00241135	-0.00318036	-0.00336696	-0.00362048	-0.00115516	-0.00298597
432	-0.00395587	-0.00272563	-0.00349946	-0.00309583	-0.00166808	-0.00235582	-0.00296499	-0.00312751	-0.000809745	-0.00306638
433	-0.00310219	-0.00212818	-0.00275573	-0.0022687	-0.00103787	-0.00173226	-0.00258716	-0.00208685	0.000107139	-0.00159999
434	-0.00332901	-0.00330265	-0.00349395	-0.00306822	-0.00205691	-0.00257212	-0.00308879	-0.0027696	-0.000893996	-0.00243418
435	0.000439527	0.00136909	0.000785113	0.0009429	0.00197219	0.00161181	0.000794632	0.00109212	0.00330512	0.00146767
436	0.000539203	0.00153245	0.00086739	0.00105586	0.00209231	0.00159518	0.000857532	0.00120809	0.00337056	0.00160935
437	0.000669777	0.00165691	0.000940242	0.00113533	0.00218347	0.00178094	0.000969032	0.00134459	0.00339398	0.00168095
438	0.00060831	0.00164333	0.0010071	0.00107287	0.00218928	0.00177233	0.000951658	0.00128956	0.00343566	0.00168339
439	0.000706314	0.0017053	0.00105942	0.00121211	0.00226176	0.00186604	0.00104623	0.0013459	0.00358139	0.00178318
440	0.000974378	0.00196041	0.00125421	0.00137961	0.00237021	0.00201286	0.00117072	0.00151723	0.00364813	0.001907
441	0.00107247	0.00199308	0.00137164	0.0014731	0.00246672	0.00210083	0.00132185	0.00167422	0.00370597	0.00208942
442	0.00112729	0.00214637	0.00143067	0.0015908	0.00267222	0.00225019	0.00147432	0.00184265	0.00378885	0.0021022
443	0.00122679	0.00225382	0.00161281	0.00167652	0.00272634	0.00233817	0.00148183	0.00184977	0.0038588	0.00230173
444	0.00130468	0.00223427	0.00161574	0.00174219	0.00274818	0.00240282	0.00156637	0.0018741	0.00396348	0.00228868
445	0.00142883	0.00235246	0.00165205	0.0018664	0.00284852	0.00240643	0.00172552	0.00201071	0.0040831	0.00234173
446	0.00144967	0.0024276	0.00181247	0.00193734	0.0029922	0.00258078	0.00172206	0.0021072	0.00415091	0.00246756
447	0.00162003	0.00259237	0.00190064	0.00204152	0.00310419	0.00267707	0.00193276	0.00229508	0.00421593	0.00263704
448	0.00168505	0.00270686	0.00207535	0.00221565	0.00305357	0.00273027	0.00196981	0.00234418	0.00433092	0.00270946
449	0.0017931	0.00285557	0.00213315	0.00238201	0.00327247	0.00300453	0.00211807	0.00242061	0.00440311	0.00292017
450	0.00195544	0.00297622	0.00226199	0.00238256	0.00350195	0.00306715	0.00230532	0.00267853	0.0045097	0.00303761
451	0.00201412	0.0030352	0.00234942	0.00248166	0.00355432	0.00316871	0.00238196	0.00260568	0.00456775	0.00312162
452	0.00205476	0.00304189	0.00235069	0.00247547	0.00373834	0.00324541	0.00235216	0.00267988	0.00467115	0.00325249
453	0.00213159	0.00314034	0.00250653	0.00258205	0.00357651	0.00325621	0.00245442	0.00280585	0.00461596	0.0031533
454	0.00218897	0.00327443	0.00259781	0.0026945	0.00369872	0.0034088	0.00258589	0.00293419	0.00474327	0.003251
455	0.00235708	0.00341624	0.00266072	0.00280707	0.00381525	0.00350595	0.00264455	0.00296127	0.00482449	0.00333929
456	0.00241086	0.00343328	0.00277561	0.00292816	0.00384902	0.00346658	0.00279144	0.00309377	0.0047949	0.0034207
457	0.00248991	0.00356117	0.00277039	0.00298693	0.00397114	0.00368717	0.00289647	0.00314906	0.00493931	0.00362745
458	0.00255877	0.00365329	0.00287668	0.00306423	0.00408154	0.00373409	0.0028687	0.00332597	0.00495282	0.00364558
459	0.00271408	0.00370346	0.00304323	0.00314176	0.00412244	0.00386209	0.00305862	0.00339821	0.00509941	0.00375973
460	0.00279653	0.00381417	0.00315159	0.0033012	0.00425575	0.00397872	0.00312261	0.00349361	0.00519409	0.0038832
461	0.00291478	0.00386802	0.00323049	0.00339773	0.00428408	0.0040407	0.00321549	0.00351474	0.00527337	0.00390248
462	0.00288858	0.00394351	0.0032658	0.00344687	0.00433523	0.00412609	0.00324831	0.00361674	0.00530915	0.00404675
463	0.00289835	0.00392225	0.00325467	0.00340414	0.00427889	0.00411457	0.00320848	0.00369063	0.00533914	0.00408991
464	0.00295717	0.00404776	0.00332288	0.00343499	0.00439842	0.00419799	0.00329757	0.00372451	0.00524918	0.00408519
465	0.00306532	0.0041342	0.00338277	0.00356808	0.00446995	0.00426443	0.00339925	0.00378746	0.00532952	0.00415218
466	0.00318143	0.00417752	0.0035268	0.00373063	0.00461801	0.00439547	0.00349769	0.00394895	0.00557535	0.00424842
467	0.00321404	0.00430313	0.00365365	0.00365921	0.00471661	0.00442291	0.00362521	0.00392754	0.00558311	0.00438092
468	0.00332999	0.00437865	0.00364856	0.00384802	0.00473546	0.00450565	0.00370686	0.00410779	0.00568627	0.00447506
469	0.0034329	0.00446955	0.00379131	0.00388907	0.00488151	0.00466203	0.00379964	0.00424454	0.00579952	0.00459833
470	0.00354794	0.00453956	0.00386512	0.00405492	0.00500185	0.00472491	0.00391461	0.00423537	0.00583856	0.00464435
471	0.0036124	0.00467164	0.00398166	0.0040523	0.00502814	0.00480899	0.00397395	0.00433634	0.00594125	0.00476101
472	0.00368428	0.00474492	0.00403148	0.00418782	0.00505397	0.00491371	0.00400523	0.00442483	0.00599044	0.00482885
473	0.00375304	0.00479588	0.00411832	0.00430305	0.00515088	0.00493316	0.00411974	0.00449307	0.00607487	0.00490845
474	0.00382503	0.00486628	0.00418339	0.00433218	0.00523458	0.0050796	0.0042096	0.00462183	0.0062363	0.0050613
475	0.00394362	0.00492869	0.0042408	0.00428964	0.00539726	0.00519449	0.0042395	0.00459754	0.00634417	0.00505879
476	0.00392838	0.00497525	0.00425736	0.00430269	0.00542724	0.00521276	0.00428606	0.00463204	0.00643432	0.00521662
477	0.00391347	0.0049776	0.00433588	0.00449004	0.00545007	0.00519914	0.00436594	0.00472487	0.00639099	0.00511645
478	0.00400623	0.00509081	0.00438513	0.00452449	0.00545801	0.00524522	0.00441293	0.00487211	0.00653875	0.00523476
479	0.00414984	0.00521127	0.00451489	0.00459792	0.00554691	0.00535139	0.00452465	0.00492344	0.0065619	0.00527107
480	0.0042049	0.00526048	0.00452733	0.00470165	0.00551045	0.00542211	0.00452109	0.0050055	0.00659956	0.00535291
481	0.00422692	0.00531168	0.00470557	0.0047921	0.00565533	0.00552283	0.00462115	0.00502174	0.00669517	0.00542613
482	0.0043372	0.00538578	0.0047099	0.00494166	0.00574061	0.00555161	0.00473403	0.00513244	0.00674317	0.00549192
483	0.00443181	0.00545654	0.00477239	0.0050265	0.00573865	0.00561545	0.00470619	0.00524915	0.00682897	0.00553619
484	0.00446493	0.00557152	0.00490877	0.00499568	0.0058349	0.00570181	0.00488315	0.00532266	0.00689001	0.00565536
485	0.0045591	0.00564817	0.00490249	0.00505399	0.00589523	0.005793	0.00491237	0.00538034	0.00702422	0.0057283
486	0.00465647	0.00560178	0.00500083	0.00513634	0.00599544	0.00592486	0.00490433	0.00542833	0.00712187	0.00575988
487	0.00471537	0.00575524	0.00514063	0.00522507	0.00607671	0.00593595	0.00511494	0.00551488	0.00720926	0.00583945
488	0.00483605	0.00578941	0.00507138	0.0052485	0.00622038	0.00598405	0.00512638	0.00553579	0.00726592	0.00590673
489	0.0048161	0.00580108	0.00515586	0.00531682	0.00620872	0.00609693	0.00515035	0.00556457	0.00729946	0.00597809
490	0.0048773	0.00591221	0.00534215	0.0053667	0.00631546	0.00616416	0.00527734	0.00572997	0.00734364	0.00611712
491	0.00503103	0.00599936	0.00540998	0.00550159	0.00636704	0.00625733	0.00528367	0.00579687	0.00744729	0.00609481
492	0.00501663	0.00606285	0.00534026	0.00554552	0.00624527	0.00625777	0.00538284	0.00585495	0.00751082	0.00622676
493	0.00492565	0.0061206	0.00535488	0.00549466	0.00644851	0.00635656	0.00541662	0.00592771	0.00758275	0.00626958
494	0.00495082	0.00600867	0.00539344	0.00546332	0.00633899	0.00625024	0.00532312	0.00573704	0.00764069	0.00632264
495	0.00505661	0.00611565	0.00540704	0.00552048	0.00636071	0.00629939	0.00541608	0.00592742	0.00761822	0.00621211
496	0.00507861	0.00611181	0.00548313	0.00562849	0.00642866	0.00635548	0.00547898	0.00593944	0.00769015	0.00628516
497	0.00513487	0.00617547	0.00551448	0.00565851	0.00639299	0.00637809	0.00546859	0.00593809	0.00749109	0.00629988
498	0.00528495	0.00618496	0.00552089	0.0057077	0.00645317	0.00648174	0.00555629	0.00605491	0.00757902	0.00638691
499	0.00535257	0.00628816	0.00574082	0.00582048	0.00659757	0.00657412	0.00569434	0.00614189	0.0077165	0.00651656
500	0.00533332	0.0062336	0.00563691	0.00578485	0.00652312	0.0065256	0.00556653	0.00607985	0.00755738	0.00652993
DMF Guest (Replicate 1)					Concentration of macrocycle = 10.4 µM in THF (200 ppm water (11.1 mM), 3.00 mL total volume); neat DMF used (1960 ppm water, 108.5 mM). A total of 155 µL of DMF was added (64400 equivalents w.r.t. macrocycle, and 540 equivalents of water).
	before each spectrum added…
Guest aliquot added:	(+0 µM)	(+5 µM)	(+5 µM)	(+5 µM)	(+10 µM)	(+10 µM)	(+10 µM)	(+20 µM)	(+40 µM)	(+50 µM)																	[Macro]	[DMF]	[Guest]/[Host]	A295
Wavelength (nm)	Abs (1)	Abs (2)	Abs (3)	Abs (4)	Abs (5)	Abs (6)	Abs (7)	Abs (8)	Abs (9)	Abs (10)																	1.04e-05	0	0	0.539703
250	0.48355	0.89291	1.29241	1.70552	2.51522	3.29172	4.03403	5.4618	6.18207	10																	1.03827e-05	0.0215797	2078.43	0.544844
251	0.487685	0.823881	1.15199	1.49294	2.16547	2.81101	3.42695	4.56599	6.26682	10																	1.03654e-05	0.0430878	4156.87	0.547168
252	0.494078	0.767985	1.0357	1.31484	1.86957	2.40151	2.91182	3.85434	5.73742	6.01482																	1.03483e-05	0.0645245	6235.3	0.549223
253	0.502753	0.724234	0.940654	1.16667	1.62026	2.05566	2.47362	3.24572	4.67916	5.89443																	1.0314e-05	0.107185	10392.2	0.558531
254	0.513901	0.690348	0.862891	1.04398	1.41046	1.76311	2.10149	2.72873	3.90918	5.18182																	1.02801e-05	0.149565	14549	0.564552
255	0.5264	0.66609	0.802085	0.945644	1.24024	1.52319	1.79519	2.30093	3.26001	4.27536																	1.02463e-05	0.191666	18705.9	0.566661
256	0.540303	0.64981	0.755803	0.868087	1.10218	1.32679	1.54209	1.9438	2.71218	3.53325																	1.01794e-05	0.275045	27019.6	0.567262
257	0.555113	0.640236	0.721774	0.808897	0.993304	1.16988	1.33921	1.6552	2.2635	2.91615																	1.00483e-05	0.43858	43647.1	0.563611
258	0.570139	0.636013	0.698058	0.765127	0.910138	1.04837	1.18023	1.42657	1.90267	2.41854																	9.88906e-06	0.637167	64431.4	0.558171
259	0.585499	0.635593	0.682286	0.732941	0.845862	0.952305	1.05359	1.2421	1.60944	2.00824
260	0.600608	0.638368	0.672717	0.710652	0.798345	0.880303	0.956964	1.09949	1.37866	1.68328
261	0.614051	0.64305	0.668268	0.696726	0.765098	0.82814	0.886171	0.993365	1.20412	1.43469
262	0.626579	0.64874	0.667069	0.687981	0.741436	0.789476	0.832939	0.911986	1.06784	1.23923
263	0.637454	0.65469	0.667886	0.683003	0.725242	0.762348	0.794565	0.852167	0.966002	1.09064
264	0.646833	0.660071	0.669461	0.680494	0.714323	0.742925	0.766749	0.808308	0.889682	0.97886
265	0.653988	0.664229	0.671098	0.679134	0.706555	0.728668	0.746252	0.775705	0.832894	0.894988
266	0.658124	0.666433	0.671244	0.677047	0.699789	0.717512	0.730623	0.751214	0.790347	0.833025
267	0.659684	0.666443	0.669533	0.673958	0.693335	0.708036	0.717674	0.7318	0.75807	0.785998
268	0.658246	0.663909	0.666301	0.669563	0.686484	0.698583	0.706131	0.715663	0.732538	0.749992
269	0.653973	0.659307	0.660837	0.663693	0.678712	0.689184	0.695074	0.701498	0.712215	0.722297
270	0.647521	0.652147	0.653536	0.655693	0.669633	0.678831	0.683565	0.687917	0.693801	0.698794
271	0.639362	0.643618	0.644717	0.646622	0.659556	0.668011	0.671934	0.674734	0.677498	0.679145
272	0.629838	0.633833	0.635009	0.636684	0.648817	0.656683	0.66007	0.661862	0.66247	0.661435
273	0.619423	0.623491	0.62439	0.625787	0.637648	0.645121	0.648161	0.649238	0.648215	0.645655
274	0.608363	0.612367	0.613303	0.614808	0.626176	0.633164	0.635913	0.636805	0.63457	0.63103
275	0.59712	0.600972	0.602153	0.603576	0.614461	0.621389	0.623833	0.624371	0.621675	0.617053
276	0.585623	0.589584	0.590749	0.592352	0.602969	0.6095	0.612105	0.612418	0.609203	0.603989
277	0.575586	0.579573	0.580849	0.582342	0.592885	0.599341	0.601737	0.601907	0.59824	0.593027
278	0.566925	0.571035	0.572244	0.573778	0.584004	0.59025	0.592551	0.59271	0.589059	0.583585
279	0.559512	0.563767	0.565058	0.566564	0.576744	0.583048	0.585305	0.585434	0.581397	0.575914
280	0.553784	0.557999	0.559451	0.56125	0.571068	0.577143	0.57955	0.579654	0.575507	0.569924
281	0.549301	0.553509	0.555243	0.55713	0.566799	0.572857	0.575062	0.57521	0.571079	0.565178
282	0.545938	0.55035	0.552141	0.553554	0.563465	0.569492	0.57181	0.572046	0.567707	0.561549
283	0.543498	0.54803	0.549891	0.551608	0.561071	0.567272	0.569614	0.569688	0.565428	0.559381
284	0.542006	0.546667	0.548546	0.550176	0.55989	0.565765	0.568034	0.56822	0.563841	0.557948
285	0.540619	0.54545	0.547237	0.549026	0.558659	0.564774	0.567004	0.56705	0.562788	0.556573
286	0.539821	0.544568	0.546532	0.548535	0.557894	0.563804	0.56628	0.566355	0.562038	0.555984
287	0.539563	0.544347	0.546226	0.548276	0.557742	0.563803	0.565992	0.566128	0.561865	0.556105
288	0.539686	0.5446	0.546641	0.548598	0.558063	0.563926	0.566191	0.566618	0.562375	0.556661
289	0.540152	0.545183	0.547397	0.549379	0.558613	0.564615	0.566899	0.567419	0.563139	0.557571
290	0.541229	0.546214	0.548217	0.550451	0.559652	0.565517	0.56808	0.568482	0.564449	0.558673
291	0.541821	0.546988	0.549109	0.551134	0.560603	0.566422	0.568808	0.569363	0.56517	0.55967
292	0.542538	0.547577	0.549887	0.551782	0.560958	0.566965	0.569352	0.569872	0.566036	0.560409
293	0.542524	0.547693	0.549871	0.551855	0.561283	0.566966	0.569388	0.570011	0.566081	0.560747
294	0.541508	0.546763	0.549005	0.551116	0.560381	0.56625	0.568741	0.569181	0.565285	0.560003
295	0.539703	0.544844	0.547168	0.549223	0.558531	0.564552	0.566661	0.567262	0.563611	0.558171
296	0.536703	0.542083	0.544306	0.546332	0.55556	0.561257	0.56371	0.56435	0.560644	0.555415
297	0.532841	0.538131	0.540174	0.54234	0.55148	0.557392	0.559772	0.560538	0.556846	0.551565
298	0.528368	0.533515	0.53593	0.537985	0.546945	0.552895	0.555444	0.555928	0.552344	0.547327
299	0.52375	0.529041	0.531269	0.533328	0.542315	0.548281	0.550455	0.55125	0.547691	0.542734
300	0.51834	0.523525	0.525827	0.527873	0.537004	0.542659	0.544757	0.545698	0.542263	0.537344
301	0.512648	0.517909	0.520264	0.522316	0.531184	0.536789	0.539068	0.540011	0.536545	0.531753
302	0.506859	0.512098	0.514292	0.516339	0.525034	0.530633	0.53319	0.534094	0.530836	0.526036
303	0.500588	0.506054	0.50799	0.510184	0.518947	0.524696	0.52669	0.527648	0.524608	0.519948
304	0.494513	0.499609	0.501884	0.503794	0.512491	0.518146	0.520267	0.52105	0.518016	0.513546
305	0.48751	0.492447	0.494659	0.496707	0.504998	0.510532	0.512889	0.513788	0.510853	0.506359
306	0.479769	0.484579	0.486751	0.488785	0.497277	0.502652	0.50451	0.505622	0.50265	0.498431
307	0.47154	0.476418	0.478473	0.480464	0.48867	0.493936	0.496128	0.497046	0.494136	0.490092
308	0.462808	0.4675	0.469389	0.471542	0.479526	0.484736	0.486724	0.487782	0.48504	0.481101
309	0.453146	0.457899	0.459864	0.461871	0.469835	0.47487	0.476876	0.477881	0.475431	0.471333
310	0.442891	0.447425	0.449332	0.451074	0.459014	0.463989	0.466022	0.466977	0.464677	0.460617
311	0.431788	0.436373	0.438199	0.439934	0.447711	0.452601	0.454481	0.455467	0.453057	0.449479
312	0.420183	0.424435	0.426298	0.428103	0.435553	0.440533	0.442202	0.443256	0.441139	0.437705
313	0.408009	0.41243	0.414123	0.415809	0.423204	0.427926	0.429624	0.430626	0.428476	0.425378
314	0.395184	0.399389	0.400983	0.402675	0.409776	0.414315	0.41615	0.417153	0.415149	0.411947
315	0.382067	0.386226	0.387787	0.389523	0.396356	0.400675	0.402358	0.403465	0.401702	0.398474
316	0.368275	0.372399	0.373882	0.375379	0.382226	0.386582	0.388178	0.389154	0.387574	0.384636
317	0.354611	0.358321	0.359955	0.361648	0.367995	0.372251	0.373601	0.37494	0.373223	0.370651
318	0.340703	0.344264	0.345776	0.347118	0.353502	0.357407	0.358961	0.360003	0.358702	0.356143
319	0.32614	0.329776	0.33111	0.332458	0.338576	0.342374	0.344022	0.344748	0.343444	0.341123
320	0.311784	0.315123	0.316614	0.318061	0.323677	0.327493	0.328934	0.329982	0.328654	0.326567
321	0.297536	0.300948	0.302317	0.303587	0.309199	0.312772	0.314062	0.315051	0.31406	0.311965
322	0.283157	0.286222	0.287431	0.288832	0.294208	0.29765	0.298825	0.299746	0.298894	0.296957
323	0.268763	0.271622	0.272863	0.274076	0.279267	0.282533	0.283854	0.284644	0.283869	0.282078
324	0.25209	0.255192	0.256366	0.25758	0.262397	0.265523	0.266613	0.26762	0.267052	0.265001
325	0.240249	0.243067	0.244214	0.245413	0.249992	0.253039	0.253951	0.254954	0.254408	0.252881
326	0.226529	0.229403	0.230127	0.231257	0.235721	0.238552	0.239502	0.240341	0.240077	0.238578
327	0.212837	0.215055	0.216216	0.217217	0.221361	0.223903	0.225098	0.225632	0.225418	0.22408
328	0.199268	0.201341	0.202218	0.203219	0.207264	0.20985	0.210655	0.211446	0.211067	0.210008
329	0.185881	0.188018	0.188954	0.189674	0.193588	0.196078	0.196985	0.197657	0.19766	0.196345
330	0.173154	0.175125	0.175788	0.176804	0.180438	0.182792	0.18364	0.184273	0.184089	0.183158
331	0.160725	0.162621	0.163394	0.164176	0.167729	0.169766	0.170316	0.171027	0.171117	0.170035
332	0.148555	0.150396	0.151117	0.151742	0.154818	0.156965	0.157733	0.15835	0.158347	0.157365
333	0.13693	0.138568	0.1393	0.140072	0.142876	0.144831	0.145246	0.14597	0.146094	0.145313
334	0.126041	0.12777	0.128295	0.129013	0.131708	0.133543	0.133906	0.134589	0.134732	0.133939
335	0.115364	0.116876	0.117397	0.118075	0.120612	0.122276	0.122812	0.123395	0.12351	0.122819
336	0.105636	0.106942	0.107404	0.108008	0.110403	0.111903	0.112369	0.112914	0.113099	0.112541
337	0.0963919	0.0977147	0.0981959	0.0987456	0.100862	0.10232	0.102778	0.103328	0.103489	0.103046
338	0.0876239	0.0887391	0.0893989	0.0899484	0.0919117	0.0932643	0.0935669	0.0943397	0.0943004	0.0938825
339	0.0794461	0.0806223	0.0812125	0.0816492	0.0833697	0.084738	0.085121	0.0855396	0.0857902	0.0855695
340	0.0750225	0.0760313	0.0764394	0.0768891	0.0787458	0.079944	0.0802977	0.0808292	0.0809091	0.0803884
341	0.0682386	0.0691112	0.0696241	0.0701003	0.0715935	0.0726464	0.0729414	0.0734658	0.0738859	0.0732544
342	0.0621782	0.0631677	0.0635578	0.0639089	0.0654621	0.0665711	0.0667946	0.0670865	0.0673077	0.0671951
343	0.0564472	0.0573824	0.0577688	0.0580875	0.0595502	0.0605343	0.0607094	0.0611542	0.0614626	0.0610708
344	0.0512295	0.0522341	0.0525227	0.0528656	0.0541337	0.0549061	0.0550509	0.0555382	0.056102	0.0557643
345	0.0468881	0.0477168	0.0478948	0.0483189	0.0494143	0.0505498	0.0506302	0.0509203	0.0512461	0.05097
346	0.0428085	0.043343	0.0435816	0.0441158	0.0452588	0.0460666	0.0461662	0.046495	0.0468771	0.0467147
347	0.0390806	0.0398072	0.0399832	0.0404331	0.0414398	0.0421728	0.0422264	0.0425238	0.0430216	0.0426768
348	0.0357486	0.0365423	0.0367751	0.0370793	0.0381948	0.0388139	0.0387731	0.0392053	0.0397941	0.0393722
349	0.033067	0.033551	0.03388	0.0341284	0.0351454	0.0358303	0.0359541	0.0362771	0.0367288	0.0363426
350	0.0303559	0.0308569	0.0312125	0.03156	0.0323256	0.0329392	0.0330442	0.0335187	0.0338929	0.0337138
351	0.0279911	0.0286263	0.0289893	0.0290061	0.0299325	0.030618	0.0309041	0.0309199	0.0317653	0.0313181
352	0.0261083	0.0265808	0.026844	0.0271751	0.0279961	0.0285061	0.0285589	0.0289358	0.0293049	0.0289794
353	0.0240578	0.0245985	0.0248764	0.0252133	0.0258762	0.0264657	0.0266061	0.0268347	0.0273761	0.0270076
354	0.0220916	0.0228221	0.023141	0.0233517	0.0241639	0.0245731	0.0245074	0.0246595	0.0253221	0.0249263
355	0.0206708	0.0212515	0.0213701	0.0215872	0.0223054	0.0228517	0.0230053	0.0230561	0.0236016	0.0234062
356	0.0193947	0.0199169	0.0200804	0.0202955	0.0208145	0.0215504	0.021463	0.0217216	0.0220943	0.0220615
357	0.0179136	0.0184458	0.018424	0.0188868	0.0194984	0.0200874	0.0200537	0.0200539	0.0207709	0.0203716
358	0.0165315	0.0172711	0.0172117	0.0175144	0.0183684	0.0187933	0.0186316	0.0187667	0.0191859	0.0189315
359	0.0154737	0.0157958	0.0158417	0.0163763	0.016864	0.0172765	0.0172534	0.0175766	0.0179443	0.0177784
360	0.0140079	0.0147769	0.0148	0.0152118	0.0155004	0.0163733	0.0161512	0.0163654	0.0167914	0.0166965
361	0.0126663	0.0135214	0.013763	0.013931	0.014665	0.0152047	0.0151837	0.0153615	0.01571	0.0154682
362	0.0116604	0.0122301	0.0123311	0.0124187	0.0135667	0.0141508	0.0141612	0.0144842	0.0149417	0.0148228
363	0.0108125	0.0112304	0.0113433	0.0118353	0.0122412	0.0130345	0.013136	0.0130208	0.0137137	0.0135025
364	0.0102376	0.0105413	0.010821	0.0109173	0.0114941	0.012033	0.0118099	0.0120462	0.0122827	0.0121768
365	0.00929506	0.00970349	0.0097719	0.0100284	0.0105533	0.0109164	0.0110943	0.0110866	0.0114177	0.0112982
366	0.00853093	0.00883884	0.00908035	0.00920262	0.00983252	0.0100947	0.0101018	0.0102403	0.0106922	0.0106281
367	0.00771015	0.00823116	0.00825765	0.00835006	0.00888269	0.0095881	0.00909931	0.0092244	0.00981469	0.00968433
368	0.00687983	0.0074911	0.00756685	0.00785616	0.00827709	0.0086088	0.00859423	0.00896015	0.00915753	0.00893693
369	0.00656952	0.00677509	0.00693472	0.00714205	0.00768918	0.00794446	0.0081384	0.00834385	0.00871224	0.00855259
370	0.00604345	0.00640726	0.00640557	0.00672821	0.00733837	0.00751912	0.00755547	0.00765263	0.00822328	0.00802848
371	0.00553819	0.00570361	0.00582818	0.00615037	0.00653472	0.00697278	0.00673151	0.00698731	0.00717402	0.00708289
372	0.0049981	0.00537106	0.00525256	0.00559697	0.00619246	0.00627183	0.00623541	0.00643972	0.00672947	0.00673248
373	0.00435838	0.00470684	0.00488621	0.00499576	0.0053488	0.00576584	0.00559801	0.00576901	0.00623811	0.00598396
374	0.00401336	0.00433696	0.0042397	0.0043031	0.00464213	0.00510442	0.00512909	0.00533675	0.00546709	0.00546361
375	0.00316164	0.00355916	0.00348518	0.00403818	0.00411715	0.0043453	0.00442086	0.00456665	0.00489941	0.00479952
376	0.00249995	0.0029328	0.00299768	0.00326615	0.00369957	0.00382623	0.00368539	0.00388661	0.00432358	0.00415322
377	0.00190232	0.00214393	0.00232342	0.00247639	0.0027839	0.00327439	0.00303979	0.0033147	0.00361361	0.00361878
378	0.00141623	0.00154478	0.0017004	0.00218164	0.00244376	0.00255328	0.00248732	0.00292612	0.00329554	0.00322567
379	0.000958982	0.00136399	0.0012393	0.00165381	0.00179295	0.00247833	0.00222778	0.00229445	0.00276385	0.0025973
380	0.00079441	0.00108265	0.00134129	0.00167106	0.00181684	0.00216041	0.00212714	0.00210185	0.00250526	0.00242756
381	0.000534134	0.000871742	0.000961585	0.00121229	0.00140411	0.00147522	0.00151623	0.0018112	0.00237055	0.00200836
382	-8.41098e-06	0.000442017	0.000532159	0.000690556	0.0010535	0.00141022	0.00106578	0.0014801	0.00164695	0.00160035
383	-0.000326986	-5.56188e-05	-0.000173799	0.000133404	0.000346341	0.00100926	0.000790633	0.000929885	0.00124556	0.00114992
384	-0.000472251	-0.000240666	-1.64908e-05	0.000108842	0.000406968	0.000782958	0.000647291	0.0010621	0.00143383	0.00118302
385	-0.000913084	-0.000315712	-0.000276575	-4.18317e-05	0.000193296	0.000399614	0.000243507	0.000514049	0.000917432	0.000656777
386	-0.00116037	-0.000775159	-0.000447679	-0.000716869	-9.31967e-05	3.63366e-06	-9.22741e-05	0.00013592	0.000623012	0.000337504
387	-0.00132353	-0.00119304	-0.000911978	-0.000710483	-0.00048329	-0.000546474	-0.000297167	1.85663e-05	0.000214959	0.000166288
388	-0.00153779	-0.00149967	-0.00135015	-0.00102987	-0.000975088	-0.000672601	-0.000661082	-0.000598827	-5.49414e-05	-0.000250781
389	-0.00200784	-0.00181086	-0.0014407	-0.00157827	-0.00135809	-0.000874134	-0.00110879	-0.000893377	-0.000428267	-0.000731621
390	-0.00249649	-0.00208465	-0.00172862	-0.00145244	-0.00153718	-0.00120559	-0.00122912	-0.00106508	-0.000621196	-0.000863873
391	-0.00240787	-0.0020183	-0.00196501	-0.00175641	-0.0014445	-0.00152829	-0.00165069	-0.00131207	-0.000661923	-0.00112831
392	-0.00255155	-0.00220572	-0.00224312	-0.00228398	-0.00178726	-0.00155876	-0.00181866	-0.00151114	-0.00114422	-0.0013806
393	-0.00267476	-0.00250558	-0.00246158	-0.00225926	-0.00205215	-0.0019085	-0.00196313	-0.00179341	-0.00147979	-0.00151347
394	-0.00281112	-0.00280613	-0.00274983	-0.00216327	-0.00228193	-0.00233681	-0.00219735	-0.00208643	-0.00150581	-0.00181159
395	-0.003212	-0.00273757	-0.00274975	-0.00252175	-0.00243374	-0.00208035	-0.0022846	-0.00218287	-0.00170684	-0.00180205
396	-0.00320647	-0.0028356	-0.00275683	-0.00287432	-0.00245569	-0.0022574	-0.00254537	-0.0020808	-0.00169741	-0.0018592
397	-0.00314876	-0.00309882	-0.00281519	-0.00257847	-0.00266051	-0.00207003	-0.00240484	-0.00227246	-0.00179348	-0.00197659
398	-0.003352	-0.00317106	-0.00315574	-0.00268376	-0.00264528	-0.0024976	-0.0025993	-0.00247878	-0.00195649	-0.0022887
399	-0.00349631	-0.00302054	-0.00317959	-0.00291535	-0.00277143	-0.00280337	-0.00262649	-0.00237833	-0.00199109	-0.0022762
400	-0.00329459	-0.00291101	-0.0026142	-0.00257768	-0.00242595	-0.00226744	-0.00225265	-0.00198105	-0.00164791	-0.00222002
401	-0.00306894	-0.00295526	-0.00279007	-0.00266624	-0.00240374	-0.00212505	-0.00245787	-0.00222191	-0.00181454	-0.00193541
402	-0.00305593	-0.0028486	-0.00274968	-0.00255611	-0.00263617	-0.00220024	-0.00220845	-0.00216367	-0.00194182	-0.00184326
403	-0.00293441	-0.00257713	-0.00273148	-0.00272002	-0.00243204	-0.00219538	-0.00222383	-0.00216366	-0.0016078	-0.00184836
404	-0.00317366	-0.00278262	-0.00257871	-0.00255731	-0.00234386	-0.00218682	-0.00213087	-0.00207486	-0.0017692	-0.0018352
405	-0.00283884	-0.00291846	-0.0026714	-0.00248775	-0.00231845	-0.00231401	-0.00217947	-0.001995	-0.0016759	-0.00207569
406	-0.00281906	-0.00245293	-0.00247977	-0.00238023	-0.00205284	-0.00185859	-0.00210259	-0.00197222	-0.001405	-0.00172953
407	-0.00257016	-0.00265048	-0.00252799	-0.00208139	-0.00209072	-0.00155045	-0.00195746	-0.00159308	-0.00148025	-0.00128826
408	-0.00200037	-0.00203799	-0.00179001	-0.00169018	-0.00184015	-0.00124419	-0.00151035	-0.00128709	-0.000936478	-0.000942253
409	-0.00216176	-0.00192665	-0.00181762	-0.00171473	-0.00151362	-0.00146391	-0.00127719	-0.00134357	-0.000620094	-0.00120584
410	-0.0021729	-0.00191889	-0.00199381	-0.00157133	-0.00146591	-0.00122977	-0.00144376	-0.00122359	-0.000991299	-0.000906344
411	-0.00186589	-0.00183458	-0.00172697	-0.00140146	-0.00119309	-0.00130165	-0.00118783	-0.00090853	-0.000510493	-0.000762345
412	-0.0019123	-0.0018868	-0.00175923	-0.00137633	-0.00156655	-0.00117464	-0.0010002	-0.00142545	-0.00088386	-0.00106479
413	-0.00171618	-0.00142084	-0.00147003	-0.00137833	-0.0012811	-0.0009214	-0.0010328	-0.000873069	-0.000495127	-0.000733462
414	-0.00172052	-0.00148421	-0.00114341	-0.000989839	-0.00114075	-0.000633463	-0.000965626	-0.000676863	-0.000285694	-0.000638115
415	-0.00151629	-0.00118818	-0.00132828	-0.00115076	-0.000692022	-0.000774806	-0.000938027	-0.000681085	-6.75666e-05	-0.00047083
416	-0.00143485	-0.00143496	-0.00129937	-0.00105913	-0.000886805	-0.00073429	-0.000796631	-0.000592404	-0.000454051	-0.000463153
417	-0.00128259	-0.00114398	-0.0011763	-0.000876079	-0.00106462	-0.000477108	-0.000805564	-0.000702785	-0.000344888	-0.000525433
418	-0.00123771	-0.000890565	-0.000835048	-0.000574526	-0.000814361	-0.000463607	-0.000290629	-0.000304744	6.73593e-05	-0.000366619
419	-0.00131746	-0.00119257	-0.000885523	-0.000457596	-0.000896148	-0.000422977	-0.000514146	-0.000499523	-0.000199602	-0.000359204
420	-0.00138338	-0.00124465	-0.000911004	-0.000990494	-0.000686659	-0.000434169	-0.000798744	-0.00062925	-0.000168377	-0.000358976
421	-0.00122682	-0.00149819	-0.00109965	-0.00104244	-0.000740866	-0.000681611	-0.000756969	-0.000472695	-0.000198061	-0.000272839
422	-0.00130266	-0.00132333	-0.00115767	-0.000761236	-0.000877648	-0.000438918	-0.000413394	-0.000654351	-0.000337735	-0.000508116
423	-0.00106182	-0.000961725	-0.000821759	-0.000462137	-0.00046633	-0.000543277	-3.63448e-05	-0.000262262	-1.59731e-05	-0.000457484
424	-0.00111844	-0.000249205	-0.000393611	-0.000229508	-0.000258517	-0.000281794	-0.000172507	-0.000115908	0.000550941	-0.000136788
425	-0.000563181	-0.000230694	-0.000189275	-0.000132253	0.000266394	0.000256515	5.75563e-06	0.000391832	0.000728491	0.000533901
426	-0.000298992	-0.000529129	-0.000290709	8.27281e-05	0.000110365	0.000424323	-1.65456e-05	0.000515553	0.000629092	0.000683874
427	-0.00024929	-0.000394244	-0.000259569	0.000147319	9.34411e-06	0.000159348	0.000368601	0.000293172	0.000581798	0.000504334
428	-0.000298835	-5.53567e-05	-0.000175118	8.75719e-05	-7.6948e-05	0.00015652	0.000421052	0.000176024	0.000851327	0.000471508
429	-0.000724472	-0.000187143	-7.60661e-05	-0.000206889	0.000353009	0.000291291	8.98786e-06	0.000413762	0.000868044	0.000383948
430	-0.000431405	-0.000359211	0.000116893	6.38642e-05	0.000326872	0.000274943	0.0001837	0.000501702	0.000610692	0.000543973
431	5.41595e-05	-7.10203e-05	9.84186e-05	0.000493114	0.000356132	0.000479542	0.000446356	0.000505047	0.000918315	0.000857927
432	0.000670727	0.000606498	0.000480578	0.0010319	0.000617766	0.00117018	0.00116885	0.00108455	0.00124358	0.00116039
433	0.000376202	0.000549717	0.000607895	0.000929503	0.000732524	0.00101511	0.00108519	0.00115873	0.00144759	0.00115708
434	-0.000647774	-5.39425e-05	0.000370191	0.000466839	0.000210081	0.000436259	0.000659226	0.000127156	0.00134753	0.000524213
435	0.00114395	0.00210364	0.00272598	0.00303726	0.0031678	0.00330347	0.00358092	0.00378085	0.00384358	0.00357913
436	0.00121345	0.00218846	0.00277265	0.00317557	0.00321438	0.00339418	0.00365349	0.00377682	0.00395809	0.0036158
437	0.00129235	0.00214627	0.00281447	0.00311561	0.00321362	0.00338028	0.00365882	0.00377489	0.00395908	0.00363751
438	0.0013536	0.0021707	0.0028666	0.00313829	0.00319989	0.00342421	0.00379275	0.00384183	0.0039608	0.00371139
439	0.00137598	0.00223175	0.00292703	0.00325747	0.00334656	0.00354386	0.00377702	0.00389763	0.00396493	0.0037328
440	0.00153088	0.00240027	0.00312306	0.00342317	0.00347833	0.00367924	0.00394994	0.00405561	0.00419111	0.00385532
441	0.00159472	0.00245934	0.00316178	0.00341495	0.00352095	0.00369284	0.00405339	0.00416711	0.00429351	0.00396341
442	0.00156852	0.00245656	0.00318303	0.00354273	0.00365491	0.00384098	0.00405766	0.0042484	0.00431846	0.00399889
443	0.00175047	0.00255972	0.0032944	0.0035728	0.00363812	0.0038067	0.00407525	0.00422538	0.00433625	0.00406263
444	0.00179215	0.00266339	0.00332158	0.00365371	0.00371584	0.00389936	0.00423873	0.00428943	0.00443842	0.00412956
445	0.00186436	0.00273863	0.00347097	0.00374139	0.00381026	0.00398342	0.00428363	0.00436383	0.0045207	0.00418714
446	0.00205364	0.00291952	0.0035406	0.00380581	0.0040088	0.00410808	0.00442363	0.00456181	0.00466373	0.00433784
447	0.00202197	0.00298438	0.00363241	0.00389122	0.00405054	0.00416262	0.00450814	0.00459499	0.00472728	0.00432492
448	0.00218676	0.0030435	0.00378409	0.00404102	0.00407311	0.00427219	0.00458657	0.00470233	0.00477577	0.0044656
449	0.00226276	0.00317201	0.00392823	0.00413164	0.00423109	0.00442042	0.00479825	0.00483757	0.00496762	0.00458746
450	0.00229175	0.00317273	0.00393214	0.00418916	0.00429972	0.00448929	0.00473157	0.0049041	0.00498361	0.00471837
451	0.00242231	0.00330773	0.00397227	0.00427996	0.00431976	0.00447338	0.00483072	0.00492422	0.00511176	0.00463127
452	0.00247909	0.00341111	0.00399191	0.00431308	0.00436779	0.00454841	0.00489362	0.00505211	0.00513723	0.00472028
453	0.00251495	0.00341286	0.00416717	0.00443532	0.00447806	0.00465682	0.00500215	0.00511972	0.00520485	0.00486348
454	0.00256841	0.00348373	0.00415948	0.00448587	0.00454466	0.00466223	0.00503506	0.00520236	0.00525731	0.00487828
455	0.00267146	0.00353533	0.00429121	0.0045308	0.00463836	0.00480514	0.00509391	0.00519172	0.00532605	0.0049443
456	0.00276106	0.00358163	0.00425917	0.00463683	0.00463611	0.00486439	0.00518473	0.0053295	0.00543283	0.00506755
457	0.00283294	0.00373473	0.00438479	0.00474521	0.00482679	0.00501292	0.00528932	0.00542444	0.00553709	0.00513075
458	0.00289111	0.00378813	0.00449721	0.00474079	0.00480182	0.00496966	0.00532354	0.00545596	0.0055362	0.00516986
459	0.00288882	0.00382122	0.00453514	0.0048671	0.00491408	0.00510379	0.0054589	0.00560899	0.00567532	0.005311
460	0.00298211	0.00380143	0.00466221	0.00492704	0.00500364	0.0051549	0.00558577	0.00562893	0.00578868	0.00544655
461	0.00299253	0.00388652	0.00462083	0.00491125	0.00502012	0.00518547	0.00554481	0.00575123	0.00585512	0.00539088
462	0.00305694	0.00392593	0.00468718	0.00495874	0.00503525	0.00520174	0.0055222	0.00568729	0.00573448	0.00536505
463	0.0031338	0.00401102	0.00474212	0.00509007	0.00510751	0.0052175	0.00557632	0.00568588	0.00581483	0.00548125
464	0.00315284	0.00402205	0.00479287	0.0050674	0.00519503	0.0053272	0.00559268	0.00572196	0.00589071	0.00545109
465	0.00319812	0.00414377	0.00486301	0.00516335	0.00519833	0.00540301	0.0056732	0.00588168	0.00594817	0.00561574
466	0.00321592	0.00417852	0.00488207	0.00524461	0.00531537	0.00544814	0.00580468	0.00590186	0.00601345	0.00565822
467	0.00337736	0.00425306	0.00500162	0.0053033	0.00532499	0.00553913	0.00586273	0.00592769	0.00611076	0.00565953
468	0.0034723	0.00434841	0.00507476	0.00536751	0.0054002	0.00558916	0.00592587	0.00606459	0.00617102	0.0057868
469	0.00348328	0.00436703	0.00514534	0.00545839	0.00550898	0.00566216	0.00594709	0.00613437	0.00623198	0.0058606
470	0.00359435	0.00446517	0.00525863	0.00550914	0.00562235	0.00578123	0.0060626	0.0062098	0.00633855	0.00591395
471	0.0036291	0.00448742	0.00532591	0.00552249	0.00568581	0.00579501	0.00614026	0.00631672	0.00645467	0.00599079
472	0.00360518	0.00458021	0.00536916	0.00573786	0.00572979	0.00584155	0.00619827	0.00631835	0.00651131	0.00607512
473	0.00372271	0.00457661	0.00539118	0.00571286	0.00582627	0.00591021	0.00626492	0.00644098	0.00656846	0.00609214
474	0.00370314	0.00462499	0.0053466	0.00560174	0.00567233	0.00585723	0.00631805	0.0064177	0.00657423	0.00613575
475	0.00378967	0.00465512	0.00545115	0.00576691	0.0057708	0.00594091	0.00632151	0.0064698	0.0065839	0.00612079
476	0.00386204	0.00480897	0.00551136	0.00585199	0.00590175	0.00599192	0.00637148	0.0065089	0.00664275	0.00621826
477	0.00397018	0.00489542	0.0056143	0.00590115	0.00597452	0.00611064	0.00650432	0.00665658	0.00676895	0.00631474
478	0.00392463	0.00491493	0.00565795	0.00594177	0.00601572	0.00613647	0.00648863	0.00663836	0.00676348	0.00626215
479	0.0040059	0.0049388	0.00569018	0.00597701	0.00598972	0.00613215	0.00647911	0.0066747	0.00676285	0.00629841
480	0.00405667	0.004958	0.00571314	0.00606203	0.00603626	0.00619443	0.00654387	0.00671712	0.00685468	0.00642071
481	0.00413454	0.00501354	0.00578537	0.00604516	0.00611524	0.00625677	0.00659659	0.00676877	0.00691707	0.00645043
482	0.00417585	0.00513339	0.00586971	0.0062019	0.00619431	0.00628408	0.00668903	0.00689196	0.00700146	0.00647806
483	0.00430485	0.00520665	0.0059449	0.00620873	0.00629182	0.00643181	0.0067813	0.00695247	0.00705764	0.00660598
484	0.00427875	0.00529394	0.00606892	0.00630872	0.00636232	0.00646328	0.00683375	0.00699675	0.00716473	0.00663362
485	0.00428693	0.00526022	0.00610491	0.00629965	0.00640089	0.00652626	0.00686239	0.0070047	0.0071617	0.00665029
486	0.00431046	0.0053263	0.00608762	0.00635776	0.00640794	0.00656163	0.00695511	0.00706563	0.00718989	0.00672982
487	0.00435053	0.00536441	0.00610086	0.00641225	0.00649197	0.00665582	0.00696799	0.00714365	0.00730078	0.00677938
488	0.00437583	0.00525838	0.00619137	0.0064515	0.00654385	0.00667149	0.00696189	0.00713303	0.00733408	0.00678667
489	0.00443926	0.00535736	0.00612554	0.00641927	0.00659259	0.00670595	0.00702512	0.00720909	0.00744139	0.00679624
490	0.00440584	0.0053744	0.0060932	0.0064153	0.00652073	0.00661967	0.00703545	0.00726628	0.00745512	0.00679376
491	0.00455217	0.00547047	0.00619499	0.00647743	0.00655923	0.00668572	0.00705376	0.00719759	0.00734897	0.00681469
492	0.00454168	0.00542291	0.00620183	0.00655565	0.00657695	0.00672165	0.00703303	0.00718995	0.00741477	0.00680049
493	0.00458721	0.00550541	0.00629515	0.00656425	0.00662817	0.00674521	0.00712501	0.00731381	0.00743539	0.00695925
494	0.00459945	0.0055672	0.00634161	0.00660981	0.00665351	0.00676201	0.00714461	0.00735702	0.0075396	0.00696998
495	0.00466992	0.00557674	0.00637211	0.00663855	0.00670105	0.00686473	0.0072059	0.0073287	0.00751576	0.00698706
496	0.00469122	0.00565324	0.00642572	0.00661602	0.00674289	0.00690354	0.00720012	0.007377	0.00755929	0.0070313
497	0.00474248	0.0056198	0.00646112	0.00673368	0.00679479	0.00694443	0.00728732	0.00742815	0.00763489	0.00700507
498	0.00471496	0.00569953	0.00648296	0.00673109	0.00682136	0.00696784	0.00727237	0.00749388	0.00759189	0.00699912
499	0.00490007	0.00579106	0.0065451	0.00685624	0.00689978	0.00703494	0.00738016	0.00761194	0.00773639	0.00720191
500	0.00464854	0.00555255	0.0063507	0.00673064	0.00677449	0.00684631	0.00723975	0.0074087	0.00756522	0.00701583
DMF Guest (Replicate 2)					Concentration of macrocycle = 10.4 µM in THF (200 ppm water (11.1 mM), 3.00 mL total volume); neat DMF used (1960 ppm water, 108.5 mM). A total of 155 µL of DMF was added (64400 equivalents w.r.t. macrocycle, and 540 equivalents of water).
	before each spectrum added…
Guest aliquot added:	(+0 µM)	(+5 µM)	(+5 µM)	(+5 µM)	(+10 µM)	(+10 µM)	(+10 µM)	(+20 µM)	(+40 µM)	(+50 µM)																	[Macro]	[DMF]	[Guest]/[Host]	A295
Wavelength (nm)	Abs (1)	Abs (2)	Abs (3)	Abs (4)	Abs (5)	Abs (6)	Abs (7)	Abs (8)	Abs (9)	Abs (10)																	1.04e-05	0	0	0.553021
250	0.47188	0.903972	1.35168	1.79982	2.64356	3.46949	4.2232	5.82025	10	10																	1.03827e-05	0.0215797	2078.43	0.556192
251	0.476327	0.830076	1.19962	1.56956	2.26858	2.95642	3.57676	4.79414	6.17387	7.07949																	1.03654e-05	0.0430878	4156.87	0.560031
252	0.483398	0.770551	1.07272	1.37653	1.95055	2.5199	3.03494	4.04006	5.73138	6.81832																	1.03483e-05	0.0645245	6235.3	0.566229
253	0.492967	0.723882	0.968968	1.21606	1.68426	2.14953	2.57032	3.40285	4.92063	6.91515																	1.0314e-05	0.107185	10392.2	0.56769
254	0.504549	0.68776	0.884122	1.08309	1.45932	1.83635	2.17721	2.85419	4.0754	5.35577																	1.02801e-05	0.149565	14549	0.572001
255	0.518134	0.661723	0.817657	0.976208	1.27644	1.57823	1.85121	2.39824	3.38953	4.45621																	1.02463e-05	0.191666	18705.9	0.575744
256	0.532976	0.644238	0.766705	0.892097	1.12809	1.36778	1.58406	2.01948	2.81473	3.67589																	1.01794e-05	0.275045	27019.6	0.579191
257	0.54896	0.633774	0.729275	0.827226	1.01096	1.19899	1.36861	1.7122	2.34177	3.0282																	1.00483e-05	0.43858	43647.1	0.577568
258	0.565133	0.629223	0.703019	0.779642	0.921654	1.06839	1.20041	1.46905	1.96375	2.505																	9.88906e-06	0.637167	64431.4	0.571143
259	0.581382	0.628759	0.685541	0.744733	0.852665	0.965387	1.06658	1.27323	1.65469	2.0741
260	0.597269	0.631941	0.674819	0.72026	0.801422	0.887493	0.964302	1.12198	1.41189	1.73212
261	0.611683	0.636828	0.669631	0.704705	0.765617	0.831273	0.889068	1.00894	1.22804	1.47068
262	0.624756	0.642384	0.667685	0.694782	0.73974	0.789431	0.832791	0.922195	1.08464	1.26411
263	0.636487	0.649033	0.667616	0.689098	0.722064	0.759425	0.791542	0.858361	0.977252	1.1083
264	0.646189	0.654548	0.669283	0.686201	0.709739	0.738286	0.762247	0.811283	0.896866	0.990061
265	0.653481	0.658931	0.670219	0.68407	0.701308	0.722602	0.740538	0.776681	0.837347	0.902137
266	0.657962	0.661587	0.670583	0.6819	0.694228	0.710611	0.72396	0.750794	0.793215	0.837039
267	0.65967	0.661722	0.669171	0.678931	0.687773	0.700687	0.710903	0.730714	0.759447	0.788033
268	0.658246	0.65969	0.665915	0.674587	0.680765	0.691129	0.698885	0.714144	0.733346	0.750739
269	0.654383	0.655235	0.6607	0.66847	0.673064	0.681799	0.688327	0.699684	0.712317	0.722056
270	0.647897	0.648512	0.653347	0.660715	0.664063	0.671468	0.67691	0.685862	0.693898	0.698224
271	0.639421	0.640198	0.644524	0.651417	0.653953	0.660424	0.665044	0.672329	0.677129	0.677746
272	0.6297	0.630297	0.634556	0.641216	0.643041	0.64922	0.653362	0.659448	0.661916	0.659917
273	0.61902	0.619635	0.623849	0.630384	0.631932	0.63736	0.641003	0.64647	0.64758	0.643985
274	0.608129	0.608805	0.612643	0.618993	0.620355	0.625609	0.62915	0.633822	0.633849	0.629026
275	0.596794	0.597348	0.601643	0.60766	0.608741	0.613956	0.617301	0.621792	0.621002	0.615348
276	0.585906	0.586788	0.590633	0.59683	0.598015	0.602794	0.606015	0.610043	0.609046	0.60277
277	0.576512	0.577504	0.581349	0.587452	0.588498	0.593269	0.596533	0.600325	0.598675	0.592308
278	0.568388	0.569553	0.573573	0.579491	0.580417	0.585068	0.588392	0.592144	0.5904	0.583674
279	0.561386	0.562887	0.56667	0.572681	0.573827	0.578296	0.581496	0.584981	0.583381	0.576461
280	0.556427	0.557886	0.561722	0.567714	0.568614	0.573327	0.57656	0.579813	0.578122	0.571099
281	0.552476	0.554077	0.558012	0.564192	0.565139	0.56957	0.572883	0.576219	0.574446	0.567207
282	0.549916	0.551792	0.555426	0.561698	0.562692	0.567294	0.570535	0.573819	0.571657	0.564561
283	0.548282	0.550193	0.55409	0.560278	0.561153	0.565657	0.56903	0.572237	0.570171	0.563099
284	0.547154	0.549226	0.552994	0.559364	0.560468	0.564814	0.568037	0.571228	0.569283	0.561811
285	0.546725	0.548964	0.552885	0.559063	0.559885	0.564567	0.567814	0.571194	0.568973	0.561735
286	0.546895	0.549148	0.55302	0.559317	0.560406	0.564754	0.568184	0.571515	0.5694	0.562027
287	0.54759	0.549896	0.553793	0.560084	0.561318	0.565596	0.569108	0.572288	0.570269	0.563137
288	0.549019	0.551351	0.555149	0.56153	0.562527	0.567086	0.570679	0.573793	0.571964	0.564915
289	0.550502	0.552939	0.557085	0.563361	0.564462	0.56891	0.572331	0.575745	0.573914	0.566919
290	0.552142	0.554771	0.558819	0.564963	0.566002	0.570701	0.57418	0.577697	0.575763	0.568806
291	0.553566	0.556292	0.560182	0.566538	0.567696	0.572205	0.575678	0.57915	0.577512	0.570683
292	0.55474	0.557458	0.56142	0.567822	0.568999	0.573515	0.57704	0.580572	0.578857	0.572152
293	0.555329	0.558298	0.562109	0.568444	0.569681	0.574378	0.57781	0.581265	0.579512	0.572972
294	0.554696	0.557491	0.561534	0.567778	0.569171	0.573618	0.577324	0.580659	0.579131	0.572216
295	0.553021	0.556192	0.560031	0.566229	0.56769	0.572001	0.575744	0.579191	0.577568	0.571143
296	0.550225	0.553265	0.557213	0.563528	0.564787	0.5695	0.573243	0.576546	0.574907	0.568555
297	0.546873	0.549485	0.553647	0.559998	0.561359	0.565799	0.569525	0.573073	0.571409	0.56527
298	0.542381	0.54546	0.549205	0.555709	0.557065	0.561614	0.56533	0.568779	0.567461	0.561139
299	0.538041	0.540731	0.54499	0.550951	0.552332	0.556922	0.560486	0.564089	0.562718	0.556701
300	0.532417	0.535409	0.539495	0.545605	0.546891	0.5513	0.555254	0.558671	0.55728	0.551402
301	0.526876	0.530005	0.533829	0.539922	0.541355	0.545842	0.549456	0.553051	0.551708	0.545877
302	0.521319	0.524215	0.528072	0.534042	0.535632	0.53985	0.543388	0.547141	0.54566	0.54003
303	0.515191	0.518102	0.52183	0.527867	0.529488	0.533663	0.537391	0.540905	0.539614	0.533954
304	0.508669	0.511582	0.515561	0.521363	0.522846	0.52712	0.530761	0.534172	0.532981	0.527652
305	0.501511	0.504208	0.508254	0.514091	0.515534	0.519526	0.523078	0.526685	0.525565	0.520303
306	0.493566	0.496538	0.500136	0.505673	0.507285	0.511508	0.515296	0.518552	0.517371	0.512158
307	0.485394	0.488137	0.491713	0.49758	0.498839	0.502918	0.506553	0.510001	0.508843	0.504013
308	0.47641	0.479097	0.482546	0.48841	0.489828	0.493782	0.49719	0.500697	0.499612	0.494627
309	0.466302	0.469181	0.472597	0.478075	0.479394	0.483672	0.487009	0.490329	0.489257	0.484677
310	0.455539	0.45818	0.461926	0.467126	0.468539	0.472346	0.475637	0.479068	0.478073	0.473631
311	0.444305	0.446941	0.45027	0.455473	0.456885	0.46072	0.464231	0.467211	0.466354	0.462166
312	0.432246	0.43491	0.437967	0.443084	0.444611	0.448426	0.451619	0.454821	0.453928	0.450063
313	0.419836	0.422205	0.425276	0.430529	0.431875	0.435526	0.438804	0.441648	0.441326	0.437021
314	0.406454	0.408843	0.411741	0.416855	0.41807	0.421778	0.424906	0.427712	0.427146	0.423365
315	0.39283	0.395124	0.398161	0.402994	0.404204	0.407744	0.410639	0.41382	0.413186	0.409518
316	0.378733	0.381138	0.38385	0.388547	0.389744	0.393366	0.396159	0.398925	0.398476	0.395059
317	0.364456	0.36687	0.369366	0.373935	0.375224	0.378424	0.3813	0.384303	0.383567	0.380466
318	0.350009	0.352156	0.354885	0.358928	0.36015	0.363543	0.366271	0.369207	0.368747	0.365645
319	0.334888	0.336977	0.339546	0.34364	0.344816	0.347985	0.350772	0.353225	0.352967	0.350161
320	0.320022	0.32219	0.324547	0.328579	0.329674	0.332835	0.335289	0.33784	0.337565	0.335024
321	0.305382	0.307347	0.309986	0.313595	0.31459	0.317506	0.320072	0.322573	0.322225	0.319895
322	0.290238	0.292047	0.294382	0.297989	0.299036	0.302148	0.304538	0.306585	0.306613	0.304282
323	0.2753	0.277395	0.279217	0.282799	0.283899	0.286622	0.288796	0.291107	0.291091	0.288873
324	0.258188	0.259981	0.261959	0.265479	0.266307	0.269046	0.271349	0.273391	0.273301	0.27128
325	0.246148	0.247792	0.249755	0.252822	0.253738	0.256508	0.258499	0.260546	0.260732	0.258648
326	0.231788	0.233419	0.235085	0.23836	0.239183	0.241526	0.243619	0.245669	0.245621	0.243811
327	0.217533	0.218721	0.220552	0.223425	0.224188	0.226782	0.228492	0.230404	0.230345	0.228894
328	0.203255	0.204823	0.206379	0.208869	0.209906	0.212118	0.213747	0.215659	0.215821	0.214253
329	0.189816	0.191142	0.192528	0.19512	0.195932	0.198239	0.199717	0.201271	0.201687	0.200312
330	0.176699	0.177739	0.17924	0.181359	0.182432	0.18452	0.185999	0.187643	0.18766	0.18638
331	0.163464	0.164822	0.165937	0.168381	0.169018	0.171005	0.172249	0.173786	0.174165	0.172963
332	0.151032	0.152012	0.153266	0.155383	0.155895	0.158175	0.159353	0.160736	0.161001	0.159956
333	0.138926	0.140036	0.141161	0.143084	0.14369	0.145585	0.146727	0.148043	0.148302	0.147392
334	0.127651	0.128904	0.12979	0.131723	0.132282	0.134093	0.135048	0.136264	0.136558	0.135847
335	0.116828	0.117565	0.118517	0.120274	0.120817	0.122573	0.123578	0.124716	0.125164	0.124487
336	0.106333	0.107422	0.10819	0.10999	0.110266	0.111844	0.112761	0.114139	0.11465	0.114036
337	0.0968371	0.0976765	0.0988326	0.100223	0.100527	0.102438	0.102955	0.10423	0.104525	0.1041
338	0.0880791	0.0889186	0.0895932	0.0909184	0.0914845	0.0925943	0.0936977	0.0949333	0.0953201	0.0947752
339	0.0796124	0.0805594	0.0811385	0.0823589	0.0826517	0.084235	0.0846955	0.0859559	0.0863842	0.0860027
340	0.0752366	0.0757984	0.0764474	0.0775632	0.07796	0.0794081	0.0799627	0.0806952	0.0809601	0.0807515
341	0.067785	0.0686757	0.0692494	0.070315	0.0706163	0.0721404	0.0726707	0.0731988	0.0736043	0.0730347
342	0.0617184	0.0623482	0.0630571	0.0641736	0.0643977	0.0656244	0.0660314	0.0667374	0.067165	0.066915
343	0.0560608	0.0564881	0.0571852	0.0580476	0.0581772	0.0595818	0.059999	0.0603759	0.0609053	0.060649
344	0.0506373	0.0511735	0.0515501	0.0525415	0.0527684	0.0540367	0.0541815	0.0548594	0.055356	0.0548968
345	0.0459212	0.0464817	0.0470984	0.0479658	0.0481514	0.0491572	0.0495445	0.0499714	0.0503956	0.0502034
346	0.0415993	0.0422469	0.0426626	0.0433495	0.0435953	0.0447909	0.0451842	0.045331	0.0459804	0.0456551
347	0.037909	0.0382909	0.0388008	0.0396224	0.0397482	0.0407548	0.0410927	0.0412905	0.0419318	0.0416913
348	0.034595	0.0350751	0.0354113	0.036193	0.0362039	0.0375653	0.0376854	0.0380237	0.0383395	0.0381778
349	0.0316449	0.0321897	0.032616	0.0328765	0.0332983	0.0345852	0.0344949	0.0346988	0.0351994	0.0349896
350	0.0288204	0.0295902	0.029962	0.0303701	0.0306448	0.0317349	0.0319269	0.0321532	0.0325521	0.0322359
351	0.0268709	0.0273236	0.0276603	0.028088	0.028382	0.0294969	0.0296252	0.0296555	0.0298461	0.0297222
352	0.0246383	0.0250493	0.0253352	0.0258176	0.0259205	0.026748	0.0269117	0.0272557	0.0276525	0.02759
353	0.0224932	0.0231792	0.0230444	0.0238564	0.0238651	0.0248833	0.025036	0.0251456	0.025512	0.0253933
354	0.0206113	0.02118	0.0213428	0.0218307	0.0219372	0.0230034	0.0229562	0.0229751	0.0233399	0.0233198
355	0.0189642	0.0192955	0.0197725	0.020049	0.0203559	0.0210774	0.0212623	0.0213605	0.0217678	0.0214505
356	0.0176122	0.0182387	0.0181847	0.0187385	0.0187716	0.0198042	0.0199151	0.0199951	0.0202248	0.020109
357	0.01611	0.0164374	0.0167609	0.0172695	0.0172996	0.018406	0.0182816	0.0184725	0.0188184	0.018911
358	0.0146842	0.0153031	0.0154714	0.01579	0.0159673	0.0172728	0.0173218	0.0172512	0.0175691	0.0173905
359	0.013514	0.0140493	0.014004	0.0144597	0.0147639	0.0158231	0.0157687	0.0159168	0.0161547	0.016278
360	0.0119176	0.0127867	0.0129112	0.0130727	0.0133648	0.0145693	0.0145307	0.0148169	0.0151778	0.0149102
361	0.0104474	0.0118307	0.0119454	0.0126284	0.0123385	0.0135121	0.0137179	0.0138013	0.0141198	0.0139687
362	0.00982727	0.0106826	0.0109375	0.0111861	0.0114115	0.012673	0.0125775	0.0126222	0.0131137	0.0129481
363	0.00900794	0.00934525	0.00940058	0.00969951	0.010109	0.0112162	0.0113662	0.0113406	0.0119631	0.0119167
364	0.00812338	0.00856812	0.00864227	0.00896569	0.00901374	0.00994302	0.00993113	0.00990969	0.0107281	0.0107227
365	0.00707449	0.00744999	0.00776004	0.00798777	0.00821695	0.00884485	0.00883043	0.00904203	0.00915088	0.00909607
366	0.00627623	0.00681561	0.00688527	0.0072998	0.00704617	0.00815387	0.00797029	0.00793684	0.0083844	0.00828227
367	0.00570613	0.00604442	0.0059078	0.00642335	0.00657985	0.00738946	0.00717693	0.00724966	0.00760044	0.00748943
368	0.00491886	0.00527604	0.00514453	0.00539901	0.00578789	0.00641446	0.00636079	0.00644927	0.00662785	0.0067018
369	0.00437446	0.00494268	0.00452688	0.00539489	0.00534297	0.00623101	0.00598008	0.0057248	0.00627792	0.00632071
370	0.00396632	0.00421809	0.0043599	0.00469379	0.00476121	0.00548392	0.00552663	0.00552022	0.00580564	0.00560839
371	0.00310656	0.00334729	0.0033921	0.00390908	0.00379295	0.00470432	0.00460744	0.00462266	0.00500522	0.00490336
372	0.00255024	0.00309888	0.00306778	0.00337692	0.00346097	0.00407724	0.00417336	0.0041656	0.00459314	0.00453087
373	0.00216408	0.0025346	0.0023564	0.00264027	0.00267647	0.00359999	0.00333949	0.003402	0.00390576	0.00366279
374	0.00136063	0.00170415	0.00218865	0.00208359	0.00198634	0.0028401	0.00301672	0.00280447	0.00308769	0.00325005
375	0.000744268	0.00114486	0.00118952	0.00131898	0.00136457	0.0023169	0.00226407	0.0022	0.00265836	0.00235768
376	0.00018117	0.000492591	0.000816537	0.000967221	0.000793738	0.00204183	0.00161426	0.00182883	0.00231099	0.00215245
377	-0.000564752	-8.11993e-05	-0.000129712	0.000212818	7.03016e-05	0.00141681	0.000944873	0.00123811	0.00130843	0.00144152
378	-0.00104841	-0.000326048	-0.000574988	-0.000508055	-0.000425469	0.000833288	0.000447171	0.00059917	0.00111842	0.000884421
379	-0.00144149	-0.00112379	-0.000847469	-0.000756515	-0.000836587	0.00047982	-8.09107e-05	-3.59197e-05	0.000498437	0.000418409
380	-0.00149797	-0.00131073	-0.000870988	-0.00106476	-0.000884054	-0.00042484	-0.000182077	-0.000453614	-2.98158e-05	-8.97112e-05
381	-0.00197947	-0.00164351	-0.00172288	-0.00146428	-0.00118715	-0.000619412	-0.000813112	-0.000880629	-0.000514819	-0.000510336
382	-0.0021386	-0.00205595	-0.00206351	-0.00165626	-0.00183069	-0.000923327	-0.00108173	-0.00112767	-0.0010072	-0.00106664
383	-0.0028135	-0.00223865	-0.00238207	-0.00228051	-0.00207268	-0.00146348	-0.00166483	-0.00166099	-0.00122201	-0.00150343
384	-0.00271861	-0.00240604	-0.00228982	-0.00219181	-0.00243086	-0.00145295	-0.00182373	-0.0018117	-0.00123305	-0.00111514
385	-0.00299283	-0.00293633	-0.00305266	-0.00257636	-0.0028231	-0.0020225	-0.00198472	-0.00218573	-0.00152151	-0.00190175
386	-0.00348887	-0.00315256	-0.00340945	-0.00295739	-0.00279167	-0.00218102	-0.00245229	-0.00246925	-0.00218118	-0.00206392
387	-0.0038181	-0.00352533	-0.00360074	-0.00348322	-0.0033524	-0.00249541	-0.0027438	-0.00266442	-0.00250876	-0.00254102
388	-0.00456115	-0.00382513	-0.00380796	-0.00371523	-0.00368262	-0.00299063	-0.00295616	-0.00308059	-0.00294289	-0.0027951
389	-0.00446393	-0.00428472	-0.00448612	-0.00395263	-0.00395809	-0.00336702	-0.00353727	-0.00356051	-0.00347301	-0.00325571
390	-0.00460169	-0.00470681	-0.00455299	-0.00426454	-0.00437142	-0.00352951	-0.00378376	-0.00399116	-0.00343155	-0.00344365
391	-0.0050001	-0.00466121	-0.00483775	-0.00432318	-0.00415254	-0.00361294	-0.00410777	-0.00401325	-0.00362127	-0.00360398
392	-0.00523641	-0.00472512	-0.00494874	-0.00464643	-0.00477936	-0.00384153	-0.00412933	-0.00416584	-0.00384588	-0.0041234
393	-0.00553071	-0.0052187	-0.00525036	-0.00483332	-0.00496111	-0.00426538	-0.0041598	-0.00438348	-0.00415382	-0.00417898
394	-0.00559307	-0.00524703	-0.00523857	-0.00503875	-0.00505366	-0.00454876	-0.00447613	-0.00482752	-0.00439004	-0.00426305
395	-0.00547059	-0.00560518	-0.00554846	-0.00511305	-0.00530478	-0.00454166	-0.00473872	-0.00476173	-0.00427466	-0.00449836
396	-0.00592082	-0.00540096	-0.00535948	-0.00541686	-0.0053142	-0.00460345	-0.00489203	-0.0051209	-0.00459471	-0.00473437
397	-0.00561116	-0.00542394	-0.00542452	-0.00529578	-0.00540831	-0.00458228	-0.00486923	-0.00528526	-0.00482512	-0.00486103
398	-0.006025	-0.00584905	-0.00567857	-0.00548881	-0.00560723	-0.00496329	-0.00503162	-0.00535128	-0.00477037	-0.00472544
399	-0.00584776	-0.00582122	-0.00575604	-0.00553032	-0.00550524	-0.00525683	-0.0049755	-0.00528298	-0.0047871	-0.0045876
400	-0.00583109	-0.00519921	-0.00550773	-0.0054135	-0.00525361	-0.00445937	-0.00496092	-0.00496927	-0.00436745	-0.00460532
401	-0.00556235	-0.00531366	-0.00530321	-0.00531536	-0.0051596	-0.00462266	-0.0048272	-0.00475618	-0.00451726	-0.00450726
402	-0.00580199	-0.00541711	-0.00535743	-0.00535589	-0.00508963	-0.00475059	-0.00482046	-0.00498724	-0.00453372	-0.00463352
403	-0.00559355	-0.00542957	-0.00523441	-0.00501337	-0.00509206	-0.00450134	-0.00452711	-0.00499027	-0.00444313	-0.00446165
404	-0.00557762	-0.00541215	-0.00528117	-0.00508611	-0.00506328	-0.00463458	-0.00485284	-0.00502824	-0.00456327	-0.00458671
405	-0.00538021	-0.00520382	-0.00537599	-0.0050887	-0.00520947	-0.00431949	-0.00479087	-0.00465344	-0.00446718	-0.00429731
406	-0.00506044	-0.00518137	-0.00513876	-0.00480194	-0.00485008	-0.00416305	-0.00436828	-0.00444561	-0.00448221	-0.00423459
407	-0.00534536	-0.00504613	-0.00490051	-0.00484528	-0.00468453	-0.00425241	-0.00442993	-0.00450515	-0.00432078	-0.00411268
408	-0.00466851	-0.00454112	-0.00427088	-0.00417364	-0.00450818	-0.00375147	-0.00374988	-0.00396433	-0.00362959	-0.00351224
409	-0.00459468	-0.00460916	-0.00444326	-0.00403483	-0.00428586	-0.00371122	-0.00402769	-0.00413422	-0.0037333	-0.00344784
410	-0.00460636	-0.00452752	-0.00461609	-0.00447009	-0.00415488	-0.00360043	-0.00388531	-0.00402208	-0.00368568	-0.00355867
411	-0.00437399	-0.00402241	-0.0041058	-0.00411184	-0.00416929	-0.00338578	-0.00338155	-0.0035501	-0.00343888	-0.0034923
412	-0.00471932	-0.00440938	-0.00418385	-0.00425952	-0.00402296	-0.00366269	-0.00376774	-0.00369379	-0.0034899	-0.00327085
413	-0.00421133	-0.00387859	-0.0041046	-0.0037495	-0.00403917	-0.00364806	-0.00347579	-0.00365675	-0.00311436	-0.003274
414	-0.00414104	-0.00373366	-0.00395541	-0.00371862	-0.00358122	-0.00322426	-0.0033196	-0.00353933	-0.00331355	-0.00348536
415	-0.00396726	-0.00340399	-0.00373873	-0.00386415	-0.00367643	-0.00304897	-0.00319435	-0.00320495	-0.00287592	-0.00302215
416	-0.0042118	-0.0033569	-0.00383835	-0.00367099	-0.00352957	-0.00293577	-0.00329126	-0.00312889	-0.00299892	-0.00326747
417	-0.00405753	-0.00388166	-0.00358287	-0.00359187	-0.00332961	-0.00313813	-0.0031288	-0.00364493	-0.00326253	-0.00304594
418	-0.00380276	-0.00361702	-0.00338026	-0.0035977	-0.00361168	-0.00286851	-0.00296075	-0.00302748	-0.00244492	-0.0027378
419	-0.00346848	-0.0034859	-0.00367582	-0.00350629	-0.00313064	-0.0029679	-0.00327164	-0.00332897	-0.00281741	-0.00274199
420	-0.00388259	-0.0035258	-0.00377408	-0.00362918	-0.00330907	-0.00288602	-0.00315363	-0.00315034	-0.00286772	-0.00309203
421	-0.00416583	-0.00362516	-0.00396232	-0.00355593	-0.00371403	-0.00307854	-0.00298467	-0.00346157	-0.00306963	-0.00296239
422	-0.00395917	-0.00365015	-0.0034866	-0.00336263	-0.00365915	-0.00306778	-0.00323248	-0.00345392	-0.00308761	-0.00279862
423	-0.00328543	-0.00353019	-0.00327314	-0.00316833	-0.00345859	-0.00305369	-0.00299214	-0.00301748	-0.00236915	-0.00233257
424	-0.00342679	-0.00306561	-0.00345772	-0.0027973	-0.00293179	-0.00243806	-0.00264419	-0.0026868	-0.00251863	-0.00249714
425	-0.00302606	-0.00260165	-0.0029434	-0.00287292	-0.00251546	-0.00215889	-0.00226037	-0.00227178	-0.00213915	-0.00238714
426	-0.00319983	-0.00275473	-0.00278145	-0.00276809	-0.0026955	-0.00194569	-0.002238	-0.00249776	-0.00219123	-0.00221247
427	-0.00271001	-0.00310441	-0.00241928	-0.00244384	-0.00272311	-0.00207037	-0.00206379	-0.00247016	-0.00189292	-0.00179118
428	-0.00283611	-0.00279724	-0.00281623	-0.00247678	-0.00271569	-0.00215423	-0.0023327	-0.00241655	-0.00213097	-0.00205211
429	-0.00279035	-0.00236946	-0.0030338	-0.00275179	-0.00248442	-0.00198097	-0.00228118	-0.00242058	-0.00225889	-0.00219406
430	-0.0030986	-0.00235964	-0.00252967	-0.00268822	-0.00234913	-0.00187219	-0.00239547	-0.00224806	-0.00206837	-0.00212892
431	-0.0023741	-0.00233686	-0.00216093	-0.00233871	-0.00229945	-0.0014793	-0.00187426	-0.00211109	-0.00166303	-0.00175123
432	-0.00212259	-0.0018414	-0.00184549	-0.00160594	-0.00198953	-0.00149675	-0.00131853	-0.00175463	-0.00116278	-0.000974427
433	-0.00184898	-0.00202557	-0.00173714	-0.00150666	-0.001465	-0.000995885	-0.00170787	-0.001509	-0.00091602	-0.00114446
434	-0.00224942	-0.00228997	-0.00270606	-0.00231619	-0.00231036	-0.00131976	-0.00181884	-0.00184333	-0.00170013	-0.00174833
435	0.000244672	0.000825687	0.00060021	0.000755421	0.000580203	0.00110279	0.000634821	0.000561749	0.00107393	0.000989757
436	0.000314901	0.00100621	0.000769894	0.000795259	0.000594089	0.00118073	0.000786162	0.000734417	0.0012126	0.000984688
437	0.000292638	0.00098604	0.000834718	0.000829902	0.000718438	0.00131852	0.000804588	0.000702066	0.00120554	0.00111406
438	0.0002892	0.000993163	0.000783378	0.000859112	0.000656345	0.0011933	0.000773906	0.000606056	0.00117573	0.00101897
439	0.000389555	0.00104366	0.000797455	0.000861951	0.000728742	0.0012855	0.000806554	0.000853065	0.00126551	0.00111022
440	0.00055731	0.00110533	0.000901459	0.00102534	0.000884491	0.00145799	0.000887863	0.000922174	0.00140896	0.00119113
441	0.000640412	0.00123133	0.0010349	0.001161	0.000937353	0.00153161	0.00106649	0.0010161	0.0013928	0.00131768
442	0.0007308	0.00135213	0.00109503	0.00118414	0.00100294	0.00157409	0.00118184	0.00110526	0.00161462	0.00139579
443	0.000809373	0.00141239	0.00113595	0.00113161	0.00105483	0.00168166	0.00124509	0.00110585	0.00164761	0.00149314
444	0.0008142	0.00148539	0.00131543	0.00136799	0.00117634	0.00173786	0.0012781	0.001245	0.00167079	0.0015028
445	0.000874575	0.00151255	0.00126812	0.00133026	0.00124653	0.00173021	0.00136283	0.00124942	0.00168093	0.00154584
446	0.00110793	0.00167367	0.00147488	0.00153088	0.0013756	0.00188172	0.00146728	0.00142945	0.00182026	0.00166574
447	0.00111812	0.00169997	0.00149965	0.00161339	0.00141166	0.00199399	0.00150554	0.00140662	0.00190869	0.00176104
448	0.00121364	0.00179062	0.00167744	0.00168194	0.0016279	0.00207482	0.00164709	0.00158727	0.00198206	0.00187369
449	0.00138838	0.00203503	0.00176131	0.00185905	0.00164783	0.00235832	0.00184871	0.00169918	0.00223342	0.00194861
450	0.00143612	0.00208284	0.00181488	0.00187408	0.00173682	0.00230354	0.00190717	0.00176213	0.00221742	0.00210267
451	0.00150746	0.00216093	0.00193145	0.00196057	0.00184362	0.00244555	0.00188533	0.00192823	0.0023464	0.00222336
452	0.00154052	0.00217048	0.00194738	0.00209095	0.00180658	0.00241359	0.00191633	0.00187429	0.00228927	0.00213934
453	0.0016932	0.00227033	0.00205988	0.00209038	0.00201392	0.00250203	0.00203194	0.00198206	0.00238602	0.00229293
454	0.00162222	0.00228926	0.00207295	0.00215257	0.00195731	0.00256041	0.00207043	0.00201003	0.00245213	0.00228561
455	0.00174256	0.0023445	0.002188	0.00229058	0.00209472	0.00265086	0.00219803	0.0020911	0.00258987	0.00243433
456	0.0019141	0.00242162	0.00224447	0.00230836	0.00223057	0.00274242	0.00230283	0.00217865	0.00258826	0.0025159
457	0.0019969	0.00258637	0.00238674	0.00249039	0.00229228	0.00284801	0.00234197	0.00231457	0.00275539	0.00261137
458	0.00203077	0.00258242	0.00243253	0.00247613	0.00230931	0.00290687	0.00240988	0.00239211	0.00279266	0.00265189
459	0.0021495	0.00275228	0.00256364	0.00263715	0.00250466	0.00306002	0.00253075	0.00243957	0.00296147	0.00277755
460	0.00229625	0.00292661	0.0027612	0.00275656	0.00255306	0.00318825	0.00275078	0.00262378	0.00307158	0.00295265
461	0.00229526	0.00300331	0.00272666	0.00288733	0.00267146	0.00323762	0.00275878	0.00264345	0.00316176	0.00300121
462	0.00227425	0.00285762	0.00262568	0.00279312	0.00259709	0.00317964	0.00279455	0.00270299	0.00318665	0.00292403
463	0.00235931	0.00294358	0.00271002	0.0027965	0.00266486	0.00319317	0.00281877	0.00260861	0.00308485	0.00296201
464	0.00243398	0.00303565	0.00283839	0.00283143	0.0026609	0.00326435	0.00273762	0.00269822	0.0031698	0.00302864
465	0.00251264	0.00309677	0.00285648	0.00294782	0.00282048	0.00344094	0.00290744	0.00283719	0.00327548	0.00312657
466	0.00253361	0.00321494	0.00297418	0.00303313	0.00285705	0.00342306	0.00299041	0.00289342	0.00332974	0.00315531
467	0.00260984	0.00321878	0.00304547	0.00316811	0.00295634	0.00352247	0.00307888	0.00296172	0.00338148	0.0032444
468	0.00269215	0.00328301	0.00308066	0.00316868	0.00305895	0.0036279	0.00309958	0.00302797	0.00343142	0.00334289
469	0.00281204	0.00342287	0.00326447	0.00325929	0.00314682	0.00362822	0.00320474	0.00313564	0.00353366	0.00342206
470	0.00290375	0.00347752	0.00332222	0.00332623	0.00317709	0.00375315	0.00323429	0.00317451	0.0036577	0.00347698
471	0.00293402	0.00362184	0.00337965	0.00347804	0.00331327	0.00390464	0.0034255	0.00324607	0.00374205	0.00361775
472	0.00301722	0.00358392	0.00344395	0.00349967	0.00333062	0.00385585	0.00343045	0.00335361	0.00382649	0.00365949
473	0.00315901	0.00366242	0.0035021	0.00359842	0.00339349	0.00402189	0.00354473	0.00344783	0.00384618	0.00373394
474	0.00310925	0.00382486	0.00352226	0.00366333	0.00346229	0.00409807	0.00360828	0.00353262	0.00398051	0.0037459
475	0.00315916	0.00385899	0.00362507	0.00374261	0.00359035	0.00410507	0.00360353	0.00350458	0.00395834	0.00383267
476	0.00318524	0.00385793	0.00359373	0.0036998	0.00351591	0.00414487	0.00362787	0.00349646	0.00399932	0.00380766
477	0.00329619	0.00396857	0.00371324	0.00384292	0.00366625	0.00417455	0.00374867	0.00364331	0.00406995	0.00396978
478	0.0033692	0.00395547	0.00380228	0.00388786	0.00364146	0.00421809	0.00379666	0.00364875	0.0041401	0.00391628
479	0.00330474	0.0039393	0.00376635	0.00391478	0.00370258	0.00419537	0.00376637	0.00370207	0.0040904	0.00390915
480	0.00339412	0.00407826	0.00382657	0.00388063	0.00378114	0.00432732	0.00377226	0.00367938	0.00413766	0.00402551
481	0.00348463	0.0041409	0.00385496	0.0040103	0.00379541	0.00440096	0.00386594	0.00373083	0.00428882	0.00403585
482	0.00348365	0.00421667	0.00397866	0.00401104	0.0038881	0.00438032	0.00393895	0.00382876	0.00431558	0.0041754
483	0.00360871	0.00425395	0.00396296	0.00412724	0.00397227	0.00454822	0.00404393	0.00391664	0.00432808	0.00426935
484	0.00374401	0.00432485	0.00414847	0.0042563	0.00402667	0.00454542	0.0040807	0.00400281	0.0044566	0.00428916
485	0.00370367	0.00436039	0.00413107	0.00424992	0.00413756	0.00456417	0.00413307	0.00404279	0.00447062	0.00434363
486	0.00381784	0.00438675	0.00425187	0.00433044	0.00411028	0.00469951	0.00423369	0.00406769	0.0045471	0.00441366
487	0.00385816	0.00448754	0.00424434	0.00435353	0.00422823	0.00475911	0.00425034	0.00415237	0.00463526	0.00448695
488	0.00391119	0.00454885	0.00426442	0.00437796	0.00429098	0.00479104	0.00432387	0.00420547	0.00461947	0.00454174
489	0.00396497	0.00458994	0.00442702	0.00449347	0.0043312	0.00490976	0.00440838	0.00429048	0.00471351	0.00456623
490	0.00398549	0.00461711	0.00444707	0.00446857	0.00432638	0.00488802	0.0044998	0.00433058	0.00473316	0.00460471
491	0.0040416	0.00474817	0.00451945	0.00455995	0.00436623	0.00491602	0.0045043	0.00439651	0.00486888	0.00472364
492	0.00391379	0.00469574	0.0044978	0.00461298	0.00444736	0.00499364	0.00442672	0.00441263	0.00484573	0.00469493
493	0.00403183	0.00472499	0.00443924	0.00457884	0.00428508	0.00498872	0.00440362	0.00440319	0.00487024	0.00474488
494	0.00405264	0.00465682	0.00449647	0.00458966	0.00435528	0.00493478	0.00444479	0.00434219	0.00478927	0.00464499
495	0.00407524	0.00475236	0.00456713	0.00466674	0.0044885	0.00498524	0.00445598	0.00446541	0.00483589	0.00466157
496	0.00410342	0.00480565	0.004537	0.004708	0.00448688	0.00506249	0.00454001	0.00447497	0.00481509	0.00470539
497	0.00420304	0.00472483	0.00459794	0.00472357	0.00453399	0.00504447	0.0046012	0.00442127	0.0048536	0.00475012
498	0.00412405	0.00483013	0.00455683	0.00474283	0.00455847	0.00505455	0.00468204	0.00441516	0.00492459	0.00480301
499	0.00435245	0.00496456	0.00474513	0.00491909	0.00466871	0.00527839	0.00478608	0.00468176	0.00507086	0.00494449
500	0.00427155	0.00477455	0.00469287	0.00479574	0.00462697	0.00515492	0.00472093	0.00452603	0.00496029	0.00483077
DMF Guest (Replicate 3)					Concentration of macrocycle = 10.4 µM in THF (200 ppm water (11.1 mM), 3.00 mL total volume); neat DMF used (870 ppm, 48 mM water). A total of 155 µL of DMF was added (62000 equivalents w.r.t. macrocycle, and 240 equivalents of water).
	before each spectrum added…
Guest aliquot added:	(+0 µM)	(+5 µM)	(+5 µM)	(+5 µM)	(+10 µM)	(+10 µM)	(+10 µM)	(+20 µM)	(+40 µM)	(+50 µM)																	[Macro]	[DMF]	[Guest]/[Host]	A295
Wavelength (nm)	Abs (1)	Abs (2)	Abs (3)	Abs (4)	Abs (5)	Abs (6)	Abs (7)	Abs (8)	Abs (9)	Abs (10)																	1.08e-05	0	0	0.542541
250	0.521235	0.914386	1.31119	1.6843	2.4274	3.15002	3.96559	9.3668	9.3668	9.3668																	1.0782e-05	0.0215797	2001.45	0.548452
251	0.519715	0.842866	1.16915	1.47729	2.09144	2.68175	3.27006	9.36361	9.36361	9.36361																	1.07641e-05	0.0430878	4002.91	0.5531
252	0.521262	0.784857	1.05147	1.30293	1.80683	2.28924	2.76288	3.743	9.36101	9.36101																	1.07463e-05	0.0645245	6004.36	0.556036
253	0.525561	0.739062	0.954902	1.15856	1.56859	1.96342	2.34833	3.09695	9.35884	9.35884																	1.07107e-05	0.107185	10007.3	0.557553
254	0.532561	0.703395	0.876102	1.03897	1.36848	1.68705	1.99654	2.59545	3.74664	9.35708																	1.06755e-05	0.149565	14010.2	0.564383
255	0.541704	0.677169	0.813834	0.942685	1.20495	1.4604	1.70843	2.18711	3.05579	4.29827																	1.06404e-05	0.191666	18013.1	0.564214
256	0.552683	0.659035	0.766305	0.866834	1.07325	1.27565	1.47184	1.85302	2.53703	3.34296																	1.0571e-05	0.275045	26018.9	0.564369
257	0.565123	0.64781	0.731191	0.808888	0.969426	1.12828	1.28198	1.58151	2.11949	2.73784																	1.04348e-05	0.43858	42030.5	0.56166
258	0.578071	0.642434	0.7066	0.766017	0.889834	1.01408	1.13313	1.36691	1.78786	2.27266																	1.02694e-05	0.637167	62045.1	0.560525
259	0.591815	0.641253	0.690153	0.734852	0.828865	0.924654	1.01555	1.19433	1.51815	1.89262
260	0.605196	0.642794	0.6801	0.713384	0.783823	0.857074	0.925403	1.06103	1.30672	1.59342
261	0.617598	0.646623	0.675025	0.69965	0.752213	0.808575	0.859958	0.961518	1.14605	1.36443
262	0.629455	0.651768	0.673035	0.691091	0.72988	0.772807	0.810226	0.885343	1.0213	1.18348
263	0.639319	0.656863	0.67314	0.68609	0.714314	0.747442	0.774711	0.82983	0.928498	1.04778
264	0.647628	0.661616	0.674117	0.683565	0.704119	0.729763	0.749133	0.78874	0.859242	0.945991
265	0.654056	0.665375	0.675217	0.682034	0.696601	0.716946	0.730385	0.75848	0.807663	0.869566
266	0.658056	0.667471	0.675497	0.680325	0.690755	0.707158	0.716552	0.736257	0.769832	0.813044
267	0.659477	0.667571	0.674198	0.678001	0.685466	0.698867	0.705219	0.718716	0.740801	0.770888
268	0.658246	0.665479	0.671418	0.673974	0.679253	0.690605	0.694877	0.704101	0.718296	0.738358
269	0.654503	0.661067	0.666273	0.668562	0.672485	0.682312	0.685177	0.691521	0.699716	0.713291
270	0.64843	0.654613	0.659231	0.66138	0.664248	0.673095	0.674732	0.67886	0.68335	0.692067
271	0.640621	0.646546	0.650955	0.652711	0.654986	0.663335	0.664337	0.667169	0.66869	0.674293
272	0.631553	0.637241	0.64167	0.643425	0.645101	0.652833	0.653651	0.655148	0.655234	0.658387
273	0.6215	0.627146	0.631459	0.633165	0.634718	0.642073	0.64229	0.64353	0.642169	0.64375
274	0.610983	0.616752	0.620793	0.62257	0.623814	0.631062	0.631259	0.631773	0.629636	0.630217
275	0.60043	0.605987	0.61022	0.611928	0.613209	0.620328	0.620073	0.620347	0.61777	0.617652
276	0.59033	0.595974	0.60026	0.602145	0.60315	0.609868	0.609708	0.60978	0.606712	0.606258
277	0.581608	0.586957	0.591176	0.593033	0.594388	0.601028	0.600867	0.600796	0.597452	0.596712
278	0.573173	0.578675	0.583043	0.585353	0.586213	0.592801	0.59262	0.592447	0.589102	0.588015
279	0.566393	0.572003	0.576212	0.578531	0.579565	0.586023	0.585799	0.585745	0.582201	0.581017
280	0.561092	0.566756	0.570956	0.573305	0.574446	0.58084	0.580651	0.580689	0.577109	0.575682
281	0.556895	0.562591	0.567119	0.569479	0.570548	0.576873	0.576793	0.576621	0.57304	0.571604
282	0.553932	0.559543	0.564011	0.566329	0.567596	0.573953	0.573745	0.573478	0.569933	0.56863
283	0.551611	0.557342	0.561878	0.564236	0.56536	0.571967	0.571719	0.571624	0.568023	0.566404
284	0.550041	0.55586	0.560392	0.562836	0.563863	0.570543	0.570446	0.570005	0.566494	0.564978
285	0.548871	0.554747	0.559303	0.561951	0.56317	0.569641	0.569621	0.569304	0.565737	0.563995
286	0.547824	0.55363	0.55832	0.560944	0.562167	0.568631	0.568514	0.568501	0.564842	0.563559
287	0.547096	0.553163	0.55775	0.560378	0.561583	0.568364	0.568198	0.567968	0.564665	0.563292
288	0.546722	0.552769	0.557406	0.560125	0.561333	0.568137	0.567783	0.567993	0.564604	0.563092
289	0.546786	0.552662	0.557416	0.560214	0.561333	0.567955	0.567938	0.567902	0.564816	0.563403
290	0.546922	0.552855	0.557693	0.560392	0.561673	0.568482	0.568439	0.568279	0.565376	0.563973
291	0.547264	0.553207	0.558164	0.560844	0.562044	0.568877	0.568713	0.568733	0.565679	0.564204
292	0.547059	0.553006	0.55779	0.560544	0.56209	0.568661	0.568578	0.56842	0.565628	0.564327
293	0.546173	0.552244	0.557032	0.559839	0.561494	0.568038	0.567906	0.567909	0.565009	0.563771
294	0.545029	0.550772	0.555742	0.558515	0.559838	0.566763	0.566488	0.566424	0.563634	0.562615
295	0.542541	0.548452	0.5531	0.556036	0.557553	0.564383	0.564214	0.564369	0.56166	0.560525
296	0.539144	0.545179	0.54988	0.552456	0.554143	0.561039	0.560943	0.560958	0.558256	0.557272
297	0.534866	0.540885	0.545745	0.548303	0.549798	0.556534	0.556613	0.556541	0.553901	0.553096
298	0.529902	0.535696	0.540552	0.543248	0.544768	0.551622	0.551551	0.551682	0.54926	0.548405
299	0.524722	0.530428	0.53534	0.538138	0.539657	0.546346	0.546275	0.546382	0.544071	0.543396
300	0.519367	0.525348	0.529903	0.532634	0.534042	0.540774	0.540748	0.540909	0.538608	0.538065
301	0.513341	0.51928	0.523877	0.52664	0.528336	0.534858	0.534787	0.53485	0.532669	0.53201
302	0.507508	0.513231	0.517894	0.520353	0.521945	0.528627	0.528488	0.528647	0.526699	0.526054
303	0.501243	0.506799	0.511435	0.514103	0.515583	0.522154	0.522138	0.522361	0.520146	0.5199
304	0.494659	0.50031	0.504829	0.507499	0.508931	0.515486	0.5155	0.515506	0.513731	0.513233
305	0.487745	0.492872	0.497587	0.500081	0.501535	0.507982	0.507727	0.508133	0.506411	0.505915
306	0.479782	0.485102	0.489571	0.492188	0.493833	0.500022	0.499926	0.500076	0.498178	0.497983
307	0.471718	0.476929	0.481319	0.483702	0.485217	0.491503	0.491572	0.491564	0.490108	0.489731
308	0.462929	0.468011	0.472453	0.47472	0.47624	0.482357	0.482355	0.482653	0.481129	0.480651
309	0.453297	0.458454	0.462526	0.464968	0.466503	0.472599	0.47253	0.472787	0.471229	0.471141
310	0.442989	0.44799	0.452121	0.454419	0.455982	0.461829	0.461949	0.462082	0.460767	0.460672
311	0.432287	0.437056	0.441121	0.44349	0.444909	0.450554	0.45043	0.450897	0.44948	0.449764
312	0.420706	0.425649	0.429455	0.431646	0.433174	0.438626	0.438649	0.438986	0.437936	0.437845
313	0.408498	0.413237	0.417169	0.41928	0.420914	0.426252	0.426318	0.426476	0.425539	0.425679
314	0.395972	0.400446	0.404238	0.406435	0.407919	0.41311	0.413037	0.413348	0.412483	0.412566
315	0.383194	0.387472	0.391149	0.39315	0.394657	0.399914	0.399797	0.400182	0.399365	0.399639
316	0.369593	0.373811	0.377488	0.379348	0.38076	0.38563	0.385675	0.386152	0.385422	0.385697
317	0.35614	0.360044	0.363448	0.365241	0.366678	0.371451	0.37158	0.371731	0.371243	0.371625
318	0.34258	0.346348	0.34962	0.351574	0.35279	0.357389	0.35733	0.357847	0.35736	0.357914
319	0.328431	0.332057	0.335354	0.337115	0.338272	0.342813	0.342793	0.343044	0.342735	0.343346
320	0.314246	0.317873	0.320929	0.322456	0.323855	0.328066	0.328276	0.328604	0.328479	0.329073
321	0.300166	0.303625	0.306473	0.308404	0.309393	0.31359	0.313845	0.313995	0.31391	0.314583
322	0.286161	0.289397	0.292195	0.293921	0.295118	0.298963	0.298922	0.299187	0.299275	0.299992
323	0.272269	0.275322	0.277851	0.279399	0.280512	0.284192	0.284376	0.284877	0.28474	0.285688
324	0.25848	0.26129	0.263974	0.265435	0.266482	0.270006	0.270153	0.27036	0.270385	0.271401
325	0.244475	0.247253	0.249376	0.250977	0.25214	0.255257	0.255406	0.255853	0.256015	0.256926
326	0.231211	0.233961	0.236106	0.237532	0.23851	0.241675	0.241807	0.242055	0.242148	0.243089
327	0.217591	0.219922	0.222366	0.223598	0.224616	0.227628	0.22747	0.22804	0.228206	0.229274
328	0.204316	0.206761	0.20878	0.210167	0.210871	0.213623	0.21367	0.214274	0.214402	0.215421
329	0.191383	0.193644	0.195581	0.196876	0.197741	0.200347	0.200482	0.200752	0.201135	0.202106
330	0.178996	0.18099	0.182943	0.183972	0.184942	0.187249	0.187166	0.187703	0.187978	0.189075
331	0.166814	0.169026	0.170587	0.171834	0.172413	0.174699	0.174773	0.175101	0.175737	0.176639
332	0.155106	0.156937	0.158637	0.159672	0.160302	0.162573	0.162587	0.162984	0.16334	0.164493
333	0.143848	0.145479	0.146911	0.148105	0.148726	0.150607	0.150581	0.151139	0.151505	0.152601
334	0.133105	0.134789	0.136092	0.137023	0.137778	0.139594	0.139526	0.139856	0.140299	0.141548
335	0.122951	0.124301	0.125693	0.126449	0.127287	0.128755	0.128804	0.129308	0.129661	0.130746
336	0.113216	0.11438	0.11571	0.116678	0.117101	0.11868	0.118646	0.118945	0.119549	0.12068
337	0.104107	0.105509	0.106486	0.1074	0.107912	0.109287	0.109209	0.10972	0.110278	0.111334
338	0.0956717	0.0967527	0.0977764	0.098647	0.099236	0.100394	0.100389	0.100812	0.10131	0.102569
339	0.0878185	0.0887141	0.0896412	0.0906032	0.0910537	0.0920926	0.0921369	0.0923621	0.093201	0.0941363
340	0.0827105	0.083756	0.0848198	0.0853507	0.0857843	0.0868021	0.0868746	0.0869656	0.0875574	0.0889306
341	0.0763036	0.0770749	0.0779919	0.0786164	0.0790459	0.0797756	0.0799998	0.0802342	0.0808798	0.0817913
342	0.0702206	0.0708764	0.0715889	0.0723889	0.0728306	0.0736027	0.0734113	0.073797	0.0746277	0.0754981
343	0.0645496	0.0652721	0.0659146	0.0666745	0.067147	0.0676956	0.0677246	0.0680086	0.0686115	0.0695997
344	0.0594277	0.0600144	0.0606944	0.0612985	0.0616465	0.0622896	0.0624537	0.0627136	0.0633094	0.0644089
345	0.0547615	0.055533	0.0560516	0.0567867	0.0571132	0.057535	0.0576664	0.0577905	0.0586718	0.0596539
346	0.0506581	0.05121	0.0520576	0.0525126	0.0529387	0.0533381	0.0533731	0.0537803	0.0541958	0.05528
347	0.0469336	0.0475453	0.0481121	0.0485659	0.0491173	0.0492993	0.0493375	0.04975	0.0503935	0.0512778
348	0.0436449	0.0440965	0.0446715	0.045226	0.0452532	0.046015	0.0460179	0.046213	0.0468875	0.0477731
349	0.0405399	0.0411039	0.0415388	0.0420771	0.0424367	0.042754	0.0427392	0.0430093	0.0437038	0.0447093
350	0.0375586	0.0381646	0.0387618	0.0392909	0.0395522	0.0398038	0.0397708	0.0401444	0.0407262	0.0416144
351	0.0352367	0.0356282	0.0362686	0.0364301	0.0367888	0.0372185	0.0373035	0.03744	0.0380992	0.0390424
352	0.0330964	0.0335076	0.0340606	0.0345522	0.0348694	0.0350104	0.0351558	0.0352275	0.0358553	0.0368092
353	0.0312259	0.0313833	0.0318731	0.0325203	0.0325496	0.0327468	0.032814	0.0329964	0.0337153	0.0344099
354	0.0290937	0.029396	0.0300748	0.0304006	0.0305365	0.0308439	0.0307934	0.0308658	0.031538	0.0323846
355	0.0271971	0.0275649	0.0281736	0.0284487	0.0288237	0.0287522	0.0289935	0.0291923	0.0296526	0.0305376
356	0.0257519	0.0261	0.0263933	0.0269801	0.027177	0.0273124	0.0271147	0.0274372	0.0280441	0.0288097
357	0.0239619	0.0246326	0.0250445	0.0252868	0.0256328	0.025673	0.0256882	0.025783	0.0264051	0.0271623
358	0.0227519	0.0230393	0.0236638	0.0239926	0.0241946	0.0243491	0.024233	0.0244425	0.0249706	0.0258124
359	0.0215236	0.0217457	0.0220215	0.0225964	0.0228731	0.0227638	0.0228512	0.0231126	0.023656	0.0244161
360	0.0202335	0.0205624	0.0210023	0.0213029	0.0214244	0.0214012	0.0213185	0.0216874	0.0222539	0.0230383
361	0.0190231	0.019348	0.0194559	0.0200722	0.0201653	0.0202928	0.0203773	0.0205695	0.0211141	0.0217073
362	0.0176472	0.0179782	0.0183579	0.0188356	0.0191903	0.0189609	0.0189899	0.0190611	0.0197855	0.0206921
363	0.0164428	0.0168571	0.0173172	0.0174552	0.0179316	0.0177619	0.0178941	0.0177861	0.0185164	0.0192866
364	0.0157658	0.0159392	0.0161701	0.0167411	0.0168381	0.0167841	0.0168292	0.0171035	0.0175431	0.0183939
365	0.0149042	0.0150779	0.0152277	0.0156798	0.0160325	0.0157212	0.0158468	0.0160061	0.0166206	0.0174744
366	0.0138758	0.0139108	0.0143111	0.0148928	0.0146776	0.0148002	0.014994	0.0151079	0.015519	0.0164033
367	0.0129713	0.0129721	0.0133657	0.0138282	0.0140371	0.0139125	0.0139921	0.0140044	0.0145443	0.0154471
368	0.0120868	0.0122191	0.0125132	0.0128686	0.0131381	0.0128069	0.0129077	0.0133366	0.013726	0.0143261
369	0.0112096	0.0115025	0.0116443	0.011994	0.01205	0.0120626	0.0120792	0.0123438	0.0129138	0.0136976
370	0.0103456	0.0104807	0.0109109	0.0111876	0.0113479	0.011344	0.0111807	0.0114281	0.0121182	0.0126539
371	0.00978077	0.00982396	0.0102438	0.0104918	0.0106209	0.0106351	0.0106289	0.0108438	0.0113585	0.0120338
372	0.00906875	0.00921408	0.00946347	0.00999248	0.00998611	0.00961719	0.00977693	0.00983314	0.0103949	0.011454
373	0.00812236	0.00829694	0.00861504	0.00888048	0.00918218	0.00891182	0.00884621	0.00904555	0.00954948	0.0104017
374	0.00747244	0.00762129	0.00778005	0.00821222	0.00821885	0.0082079	0.00821577	0.00842333	0.00886034	0.00952895
375	0.00679843	0.00665179	0.00697967	0.00731322	0.00743565	0.00718899	0.00729432	0.00740398	0.00797661	0.00867494
376	0.00600209	0.00597868	0.00625021	0.00651468	0.00667797	0.00645211	0.00666654	0.00659537	0.00719644	0.00807113
377	0.00522936	0.00526037	0.00538955	0.00566981	0.0059314	0.00576515	0.00568496	0.00596896	0.0063367	0.00719748
378	0.00418322	0.00434398	0.00462798	0.00488364	0.00522211	0.00504752	0.00502196	0.00523362	0.00588683	0.00612035
379	0.00393605	0.0037102	0.00406808	0.00440929	0.00459358	0.00449864	0.00456582	0.00444733	0.00514853	0.00582927
380	0.00347676	0.00344732	0.00363013	0.00425414	0.00415098	0.00407315	0.00402946	0.00407135	0.00454375	0.00553466
381	0.00293754	0.00289879	0.00300889	0.0034977	0.00368873	0.0033387	0.00361299	0.00358147	0.0039105	0.00499451
382	0.00220119	0.00242832	0.00267309	0.00302165	0.00291166	0.00277319	0.00263789	0.00276708	0.00351807	0.00428753
383	0.00197337	0.00181294	0.00220358	0.00261115	0.00263235	0.0024222	0.00238615	0.00265353	0.00305236	0.0036433
384	0.00167266	0.00169473	0.00169488	0.00230725	0.00221649	0.00224577	0.00215425	0.00231778	0.00290217	0.00349507
385	0.00113545	0.000888098	0.00121728	0.0014491	0.00157727	0.00134105	0.00164796	0.00172015	0.00209333	0.00288332
386	0.000681762	0.000689369	0.000669358	0.000917087	0.00137368	0.000891757	0.00118277	0.00116611	0.00169071	0.0024145
387	3.0596e-05	-2.22821e-06	0.000138811	0.000404161	0.000725315	0.00039053	0.000546214	0.000476004	0.00114932	0.00189341
388	-0.000442764	-0.000200876	-2.41553e-05	0.000246541	0.000426363	3.58575e-05	-5.22114e-05	0.000143714	0.000783847	0.00147228
389	-0.000640782	-0.000562184	-0.000523241	-0.000304157	5.4133e-05	-0.000295794	-0.000216694	-0.000268333	0.000436035	0.00114158
390	-0.00104221	-0.00128646	-0.00103603	-0.000716137	-0.000553826	-0.000746708	-0.00069363	-0.000799393	-0.000118864	0.000651626
391	-0.00151932	-0.00159464	-0.00135108	-0.00114501	-0.000809133	-0.00143931	-0.00112847	-0.00115654	-0.000678712	0.000231687
392	-0.00217902	-0.00249013	-0.00201389	-0.00174447	-0.0013703	-0.00165544	-0.00182693	-0.0015221	-0.000446138	-0.000127845
393	-0.00242852	-0.00312521	-0.00241886	-0.00164214	-0.00177399	-0.00211554	-0.00197619	-0.00200344	-0.0008285	-0.000552688
394	-0.0031968	-0.00358449	-0.00247049	-0.00205724	-0.00213832	-0.0026045	-0.00234751	-0.00245973	-0.00134635	-0.000298632
395	-0.00337403	-0.00350408	-0.00339033	-0.00292198	-0.00290412	-0.00313429	-0.00329042	-0.00309278	-0.00145347	-0.000697541
396	-0.00374176	-0.00358595	-0.00365861	-0.00319027	-0.00304586	-0.00354946	-0.00330282	-0.00320533	-0.00161408	-0.00115726
397	-0.00386952	-0.00405374	-0.00391168	-0.00354021	-0.00334309	-0.00369002	-0.00367549	-0.00343284	-0.00180987	-0.00143164
398	-0.00440705	-0.00436336	-0.00441471	-0.00384098	-0.0037841	-0.00398001	-0.00408815	-0.00392828	-0.00231482	-0.00152845
399	-0.00440295	-0.00421075	-0.00412108	-0.0038244	-0.00366912	-0.00403531	-0.0039604	-0.00391825	-0.00239865	-0.00166259
400	-0.00428659	-0.00436545	-0.0039892	-0.00370257	-0.00343483	-0.00412356	-0.00376099	-0.00376228	-0.00242409	-0.00179882
401	-0.00414084	-0.00420386	-0.00407933	-0.00371105	-0.00333212	-0.00378641	-0.00367602	-0.00379608	-0.00263268	-0.00161285
402	-0.00430767	-0.00409305	-0.00414708	-0.00360625	-0.00365973	-0.00403843	-0.00389292	-0.00376542	-0.00337563	-0.00163437
403	-0.00424855	-0.00440713	-0.00428276	-0.00387234	-0.00365294	-0.00395859	-0.00396744	-0.0039278	-0.0035025	-0.00168008
404	-0.00443488	-0.00440116	-0.00428913	-0.00402256	-0.00400508	-0.00419391	-0.00422339	-0.00390261	-0.00359908	-0.00170861
405	-0.00434866	-0.00467223	-0.00437617	-0.0042103	-0.00393779	-0.00416651	-0.00436593	-0.00425925	-0.00371076	-0.00188967
406	-0.00451819	-0.00438625	-0.00421293	-0.00422149	-0.00383144	-0.00434091	-0.00416867	-0.00400133	-0.00340899	-0.00164947
407	-0.00382663	-0.00409448	-0.00403848	-0.00369315	-0.00352947	-0.00372179	-0.0037159	-0.00363173	-0.00315987	-0.00156712
408	-0.00390303	-0.00413908	-0.00406262	-0.00366823	-0.00359671	-0.00380904	-0.00407042	-0.00395569	-0.0032749	-0.00144906
409	-0.00424878	-0.00415531	-0.00404306	-0.00384428	-0.00359237	-0.00409804	-0.00399511	-0.00386238	-0.00344589	-0.00133992
410	-0.00413273	-0.00399187	-0.00393406	-0.0035795	-0.00332741	-0.00378203	-0.00382473	-0.00377241	-0.00302562	-0.00149551
411	-0.00384061	-0.00383899	-0.00410007	-0.0035625	-0.00367737	-0.00390457	-0.00385383	-0.00359316	-0.00360605	-0.00169141
412	-0.00404077	-0.00456605	-0.00411579	-0.00347023	-0.00357493	-0.00417741	-0.00381775	-0.00370556	-0.00362906	-0.00156459
413	-0.00418858	-0.0041881	-0.00410559	-0.00372609	-0.00367729	-0.00394568	-0.00402746	-0.0037788	-0.00263908	-0.0016283
414	-0.00420663	-0.00399244	-0.00395994	-0.00355432	-0.00280253	-0.00376702	-0.00387259	-0.00384229	-0.00227792	-0.00153532
415	-0.00402793	-0.0038162	-0.00393634	-0.00327722	-0.00311857	-0.00359219	-0.00364003	-0.00354529	-0.00213732	-0.00162542
416	-0.00406485	-0.00431171	-0.00398981	-0.00336035	-0.00342036	-0.00362599	-0.00349051	-0.00347221	-0.00265766	-0.00164518
417	-0.00401106	-0.00416253	-0.00408235	-0.00315253	-0.00324081	-0.00377081	-0.00349282	-0.00353766	-0.00288726	-0.00145495
418	-0.0040465	-0.00422916	-0.00408922	-0.00323169	-0.0030435	-0.00337087	-0.00342717	-0.00350086	-0.00300384	-0.00138403
419	-0.00402862	-0.00403225	-0.00390622	-0.00375195	-0.00375372	-0.00376401	-0.00356218	-0.00349085	-0.00308657	-0.00150501
420	-0.00411757	-0.00393719	-0.00377703	-0.00357092	-0.00357485	-0.00400184	-0.00425531	-0.00357346	-0.00313456	-0.00143357
421	-0.00414029	-0.00432147	-0.00415091	-0.00369571	-0.00365207	-0.00388541	-0.00397693	-0.00374379	-0.00331454	-0.00187939
422	-0.004138	-0.00441905	-0.00429373	-0.00361257	-0.00360606	-0.00413082	-0.00386498	-0.00387039	-0.00325771	-0.00153842
423	-0.00409203	-0.0042838	-0.0036588	-0.00354305	-0.00292151	-0.00399956	-0.00391386	-0.00382134	-0.00263818	-0.00129231
424	-0.00390849	-0.00367149	-0.00343679	-0.00339526	-0.00336948	-0.00356702	-0.00359718	-0.00318523	-0.00207702	-0.00116236
425	-0.00367617	-0.00347836	-0.00333796	-0.00324006	-0.00268488	-0.00326767	-0.00330772	-0.00327356	-0.00244376	-0.00131315
426	-0.00325499	-0.00383787	-0.00361367	-0.00306414	-0.00317939	-0.00343305	-0.00328135	-0.003409	-0.00292898	-0.00116175
427	-0.00336329	-0.00427037	-0.00349177	-0.00330243	-0.00328552	-0.00365449	-0.00328317	-0.00361877	-0.00303998	-0.000812584
428	-0.00385697	-0.00364682	-0.00312662	-0.00353814	-0.00299728	-0.0035357	-0.00353297	-0.00348734	-0.00271127	-0.00127101
429	-0.00356742	-0.00365824	-0.00345848	-0.00338754	-0.003126	-0.00332933	-0.00335027	-0.00333192	-0.00261226	-0.00157487
430	-0.00341812	-0.0036538	-0.00370211	-0.00336412	-0.00307692	-0.00347225	-0.00346803	-0.00345658	-0.00261017	-0.00169814
431	-0.0029179	-0.00361714	-0.00327054	-0.00269099	-0.00269233	-0.0031212	-0.00287195	-0.00320168	-0.00248478	-0.00133535
432	-0.00283352	-0.00310824	-0.00314984	-0.00250333	-0.00251812	-0.00288171	-0.00280676	-0.00273473	-0.00227992	-0.0012859
433	-0.00332626	-0.00345295	-0.00293769	-0.00289702	-0.00272803	-0.00320101	-0.0028812	-0.00286	-0.00222813	-0.00172112
434	-0.00329026	-0.00290158	-0.00269369	-0.00294229	-0.00236628	-0.00274982	-0.00330343	-0.0025634	-0.00231068	-0.00184442
435	0.000433325	0.000922866	0.000802564	0.00125276	0.00138476	0.000863411	0.000498464	0.00106206	0.00161683	0.0022654
436	0.00052931	0.000916012	0.000788761	0.00128407	0.00136386	0.000848104	0.000610253	0.00109727	0.00162709	0.0022347
437	0.000529015	0.000930651	0.00079349	0.00136387	0.00145853	0.00095308	0.000660047	0.00117631	0.0016786	0.00233195
438	0.000598928	0.00103927	0.000937209	0.00138779	0.00156393	0.000949198	0.000651142	0.00117939	0.00175177	0.00236185
439	0.000475517	0.00107586	0.000899394	0.00141292	0.00154911	0.00101532	0.000636436	0.00115314	0.00181181	0.00241356
440	0.000610284	0.00110437	0.000935823	0.00155411	0.00157834	0.00110778	0.000657381	0.00134361	0.00182842	0.00252178
441	0.000668142	0.00119338	0.00105628	0.00157604	0.00165724	0.001181	0.000701765	0.00135968	0.00192318	0.00252154
442	0.000718488	0.00114335	0.00104797	0.00155699	0.00167066	0.00112401	0.000814254	0.00136017	0.00184754	0.00253295
443	0.000765981	0.00130313	0.0011419	0.0016261	0.00172684	0.00119849	0.000945453	0.00140297	0.00199371	0.00264739
444	0.000864632	0.00131424	0.00129552	0.00173849	0.00182538	0.0012985	0.00100567	0.00150821	0.00205059	0.00265589
445	0.000844008	0.00138084	0.00123314	0.00173973	0.00187262	0.00140723	0.00106036	0.00157888	0.00210614	0.00272826
446	0.000887846	0.00147976	0.00129531	0.00183999	0.00191299	0.00136682	0.00100612	0.00165377	0.00218196	0.00279388
447	0.00094565	0.00151238	0.0014453	0.00193315	0.00201065	0.00153303	0.00113758	0.00169892	0.00226057	0.00288823
448	0.00104367	0.0016395	0.0014656	0.00199619	0.00214353	0.00158286	0.00118233	0.00179175	0.00230395	0.00295202
449	0.00114798	0.00165295	0.00154597	0.0020636	0.0022024	0.00163562	0.00123704	0.00190728	0.00239244	0.00306414
450	0.00119918	0.00168825	0.00151251	0.00206529	0.00215677	0.00163683	0.00134925	0.00187652	0.00243339	0.00300938
451	0.00132494	0.00177677	0.00162473	0.00222778	0.00229241	0.00167782	0.00144147	0.00190318	0.00248423	0.00309269
452	0.00144079	0.00193172	0.00168623	0.00223892	0.0022923	0.00184281	0.00148023	0.00209157	0.00258013	0.00312333
453	0.00147182	0.00193409	0.00176303	0.00231309	0.00245387	0.00187393	0.00157367	0.00210338	0.00264318	0.00321483
454	0.00139535	0.00198342	0.00185256	0.00241249	0.00252352	0.00198907	0.0016231	0.00216795	0.00272041	0.00333315
455	0.00147732	0.00211382	0.00195255	0.00247927	0.00262253	0.00203888	0.0016545	0.00225429	0.00275987	0.00339451
456	0.00150282	0.00214057	0.0020167	0.0025208	0.00256873	0.00205774	0.0016533	0.00222649	0.00280888	0.00339008
457	0.00161522	0.00225776	0.00209842	0.0026139	0.00274665	0.0022392	0.00177186	0.00241453	0.00292873	0.00352339
458	0.00167689	0.00224726	0.00211159	0.00267211	0.00277307	0.00223606	0.00182701	0.00241166	0.00294693	0.00360024
459	0.00173503	0.00239195	0.00225054	0.002769	0.00286427	0.0022694	0.00184567	0.00250394	0.00303066	0.00365836
460	0.00186575	0.00245	0.0022546	0.00279608	0.00291939	0.00238953	0.00197892	0.00263006	0.00311193	0.00373485
461	0.00188489	0.00237849	0.00227682	0.00277973	0.00289869	0.00235769	0.0020265	0.00254759	0.00307065	0.00368958
462	0.0020033	0.00253885	0.00230989	0.00285336	0.00296051	0.00245918	0.00216823	0.00262175	0.00324243	0.00375931
463	0.00206358	0.00259377	0.00248192	0.00299292	0.00305908	0.00252812	0.00224697	0.0027006	0.00330255	0.00386993
464	0.00208996	0.00265737	0.00248514	0.00299752	0.0030643	0.00249911	0.00224971	0.00275481	0.00331699	0.00387906
465	0.00211843	0.0027431	0.00257021	0.0030788	0.00321185	0.00265913	0.00234011	0.00288395	0.00337553	0.00393923
466	0.00208165	0.0027215	0.00261275	0.00312302	0.00326704	0.00272917	0.0022676	0.00290376	0.00343858	0.00406559
467	0.0021676	0.00279733	0.00269595	0.00325735	0.00333746	0.00277377	0.00228644	0.00299218	0.00346785	0.00406591
468	0.00221244	0.00289732	0.00276282	0.00327432	0.00336809	0.00289407	0.00239015	0.00305768	0.00363557	0.00421192
469	0.00228497	0.00292673	0.00284622	0.00336862	0.00344586	0.00290736	0.0024996	0.00313115	0.00369249	0.00422369
470	0.00238281	0.00301114	0.00289545	0.00345002	0.00353192	0.00299524	0.00256575	0.00320148	0.00370645	0.00430396
471	0.00237403	0.00305648	0.00292283	0.00348632	0.00353452	0.00308863	0.00260732	0.00326798	0.00377164	0.00436007
472	0.00247645	0.00321845	0.00303214	0.00357688	0.0036729	0.00313364	0.00264974	0.00327243	0.00386953	0.00446095
473	0.00263807	0.00329577	0.00307147	0.00366037	0.00368581	0.00321223	0.00270875	0.00343451	0.00393628	0.00452374
474	0.00264421	0.00322583	0.00315064	0.00368831	0.00375236	0.00325189	0.00273205	0.00345992	0.00403528	0.00456274
475	0.00263124	0.00325924	0.00312998	0.00367196	0.00365508	0.00320935	0.00282874	0.0034472	0.00399522	0.0045574
476	0.00272463	0.003308	0.00317326	0.00374756	0.00376916	0.00320194	0.00293916	0.00351659	0.00395456	0.00459686
477	0.00276056	0.00338001	0.0032183	0.00377201	0.0038711	0.00333176	0.00295653	0.00362755	0.00404224	0.00460933
478	0.00292334	0.00349421	0.0033379	0.00385512	0.00386648	0.00342318	0.00305324	0.00364086	0.00414	0.00472998
479	0.00288436	0.00352948	0.00334349	0.00390377	0.00394678	0.00342702	0.0030269	0.00367397	0.00418014	0.00473529
480	0.0028436	0.00351949	0.00340236	0.0039255	0.00400635	0.00343104	0.00298625	0.00372122	0.00416428	0.00484028
481	0.00291813	0.00361959	0.00346753	0.00401948	0.00408757	0.00354282	0.00308413	0.00378728	0.00428288	0.004872
482	0.00295801	0.00362254	0.00348315	0.00404008	0.00412584	0.0035943	0.00314238	0.00383098	0.00433274	0.00487588
483	0.00294888	0.00368897	0.00351736	0.00405598	0.0041291	0.00359573	0.00310473	0.00381477	0.00440142	0.00493166
484	0.0029929	0.00369222	0.00358979	0.00405836	0.00417685	0.00369864	0.00320064	0.00385772	0.00441111	0.00499929
485	0.00303083	0.00370375	0.00363715	0.00410565	0.00427066	0.00368277	0.00313821	0.00396672	0.00443319	0.00500951
486	0.00310627	0.00380764	0.00369039	0.0041997	0.00428498	0.00372282	0.00328726	0.00399258	0.00446075	0.0049843
487	0.00314787	0.00382617	0.00367719	0.00428846	0.00430495	0.00372557	0.00327701	0.00410742	0.00451392	0.0051481
488	0.00320348	0.00391594	0.00371432	0.00429154	0.00436433	0.0038416	0.00334304	0.0040794	0.0046347	0.00510977
489	0.003202	0.00390244	0.0038527	0.00433298	0.00442297	0.00389218	0.00337986	0.00411155	0.00460569	0.00516035
490	0.00324367	0.0040228	0.00388117	0.00438555	0.00449128	0.00392024	0.00344324	0.00420579	0.00465954	0.00521125
491	0.00337451	0.00406444	0.00389562	0.00446295	0.00451902	0.00394286	0.00347898	0.00420545	0.00466241	0.00529641
492	0.00333147	0.00405441	0.00388115	0.00443976	0.00451096	0.00396096	0.00351699	0.00422473	0.00473187	0.0053648
493	0.00339761	0.00401099	0.00384351	0.00435711	0.0045819	0.00396097	0.00361191	0.00428596	0.00475814	0.00531788
494	0.00347164	0.00402499	0.00390632	0.00445749	0.00448825	0.0039495	0.00361509	0.00420682	0.00465538	0.00527282
495	0.00350723	0.00404813	0.00392479	0.00449931	0.00448744	0.00400198	0.00366108	0.00429477	0.00472947	0.00530583
496	0.00350233	0.00411486	0.00396087	0.00450524	0.00448953	0.00403957	0.00369861	0.00425447	0.00470363	0.00535332
497	0.00354934	0.00416368	0.00395061	0.00454125	0.00451993	0.00404218	0.00371399	0.00431811	0.00473094	0.0053576
498	0.00354257	0.00412846	0.00400697	0.00457302	0.00463003	0.00406753	0.00379051	0.00436519	0.00477433	0.00535619
499	0.00359087	0.00417605	0.00406671	0.00459303	0.00459907	0.00413923	0.00377907	0.0041229	0.00483569	0.00542965
500	0.00359156	0.00398494	0.00392457	0.00453061	0.00449238	0.00396365	0.00373776	0.00393581	0.00469621	0.00532902
DMF Guest (Replicate 4)					Concentration of macrocycle = 10.8 µM in THF (200 ppm water (11.1 mM), 3.00 mL total volume); neat DMF used (870 ppm, 48 mM water). A total of 155 µL of DMF was added (62000 equivalents w.r.t. macrocycle, and 240 equivalents of water).
	before each spectrum added…
Guest aliquot added:	(+0 µM)	(+5 µM)	(+5 µM)	(+5 µM)	(+10 µM)	(+10 µM)	(+10 µM)	(+20 µM)	(+40 µM)	(+50 µM)
Wavelength (nm)	Abs (1)	Abs (2)	Abs (3)	Abs (4)	Abs (5)	Abs (6)	Abs (7)	Abs (8)	Abs (9)	Abs (10)																	[Macro]	[DMF]	[Guest]/[Host]	A295
250	0.488277	0.888989	1.28987	1.68894	2.44698	3.19469	4.02485	9.62257	9.62257	9.62257																	1.08e-05	0	0	0.551962
251	0.488411	0.817956	1.14771	1.47711	2.10238	2.71508	3.32706	9.61908	9.61908	9.61908																	1.0782e-05	0.0215797	2001.45	0.557125
252	0.491738	0.760852	1.03007	1.29927	1.81247	2.31329	2.80485	3.81241	9.61623	9.61623																	1.07641e-05	0.0430878	4002.91	0.565453
253	0.497937	0.71601	0.933965	1.15235	1.56993	1.97899	2.37813	3.1537	9.61385	9.61385																	1.07463e-05	0.0645245	6004.36	0.567831
254	0.507016	0.681365	0.855644	1.03063	1.36645	1.69656	2.01987	2.63956	3.81458	9.61192																	1.07107e-05	0.107185	10007.3	0.572381
255	0.518128	0.656632	0.794855	0.933043	1.20044	1.46423	1.72432	2.22207	3.11581	4.35742																	1.06755e-05	0.149565	14010.2	0.574285
256	0.531172	0.63992	0.748216	0.856562	1.06712	1.27546	1.482	1.87754	2.58405	3.41138																	1.06404e-05	0.191666	18013.1	0.576351
257	0.545503	0.630282	0.714459	0.798445	0.962045	1.12554	1.28798	1.60015	2.15592	2.79463																	1.0571e-05	0.275045	26018.9	0.576417
258	0.56053	0.626268	0.691654	0.755726	0.882537	1.00926	1.13627	1.37979	1.81571	2.3147																	1.04348e-05	0.43858	42030.5	0.574967
259	0.575973	0.626479	0.676552	0.725276	0.821493	0.918511	1.0165	1.2034	1.53885	1.92445																	1.02694e-05	0.637167	62045.1	0.570571
260	0.591221	0.62993	0.668075	0.704399	0.777166	0.850548	0.925088	1.06706	1.32164	1.6156
261	0.605341	0.635022	0.664629	0.691463	0.746526	0.80175	0.858464	0.965944	1.15784	1.38012
262	0.618708	0.641525	0.664362	0.683976	0.724837	0.766108	0.8085	0.888271	1.03007	1.19436
263	0.630397	0.648205	0.666139	0.680461	0.710791	0.741494	0.773425	0.832118	0.9355	1.0552
264	0.640186	0.654381	0.668726	0.678888	0.701779	0.72425	0.748193	0.790867	0.865435	0.951248
265	0.6481	0.659325	0.671217	0.678627	0.695515	0.712307	0.730241	0.760894	0.813426	0.873022
266	0.653133	0.662541	0.672853	0.677935	0.690842	0.703222	0.71671	0.738651	0.774959	0.815714
267	0.655768	0.663645	0.672505	0.676358	0.686458	0.695771	0.705874	0.721488	0.74627	0.772808
268	0.655368	0.6625	0.670583	0.673682	0.681492	0.688586	0.696265	0.707205	0.723677	0.739985
269	0.652571	0.658855	0.666599	0.668764	0.675445	0.680826	0.687317	0.694979	0.705561	0.715212
270	0.647155	0.653155	0.660805	0.662672	0.668173	0.672606	0.677508	0.683091	0.689463	0.69407
271	0.640323	0.645914	0.653258	0.654717	0.659869	0.663263	0.667538	0.671467	0.675192	0.676342
272	0.631723	0.63718	0.644393	0.645853	0.650223	0.653526	0.65707	0.659908	0.661704	0.6607
273	0.622243	0.627532	0.634604	0.636001	0.640267	0.643003	0.646235	0.648354	0.648824	0.646258
274	0.6122	0.617388	0.624549	0.625929	0.629998	0.632463	0.635399	0.636965	0.636484	0.632837
275	0.602061	0.607181	0.614435	0.615814	0.619811	0.622054	0.624732	0.625772	0.624802	0.620692
276	0.592677	0.597692	0.604824	0.606275	0.609971	0.612168	0.614953	0.615688	0.614215	0.609612
277	0.583798	0.588838	0.596105	0.597574	0.601546	0.603591	0.606071	0.606597	0.605052	0.599973
278	0.576178	0.581179	0.588444	0.589856	0.593773	0.595746	0.598292	0.598691	0.596854	0.591871
279	0.569785	0.574817	0.582007	0.58374	0.587655	0.5895	0.591932	0.592237	0.590381	0.585062
280	0.565039	0.570135	0.577549	0.579167	0.583087	0.584811	0.587371	0.587481	0.585449	0.580525
281	0.561734	0.566605	0.574136	0.575727	0.579813	0.581422	0.583874	0.584025	0.582043	0.5766
282	0.558934	0.564064	0.571579	0.573277	0.577222	0.579066	0.581386	0.581524	0.579391	0.57399
283	0.55691	0.562015	0.569667	0.571433	0.575556	0.577348	0.579579	0.579649	0.57743	0.572323
284	0.555599	0.560758	0.568354	0.570315	0.574525	0.576217	0.57849	0.578521	0.576441	0.571162
285	0.554503	0.559811	0.567552	0.569422	0.573518	0.575408	0.577706	0.577658	0.575752	0.570322
286	0.554001	0.559024	0.566968	0.569095	0.573263	0.575057	0.577408	0.577266	0.575274	0.570087
287	0.553925	0.559101	0.567159	0.569257	0.573427	0.575218	0.57739	0.577414	0.575617	0.570322
288	0.554268	0.559394	0.567429	0.569754	0.573907	0.575703	0.577873	0.57788	0.576205	0.571
289	0.554954	0.560099	0.568155	0.5704	0.574684	0.576616	0.57872	0.578864	0.576877	0.571846
290	0.555694	0.560906	0.569096	0.57127	0.575745	0.577529	0.579653	0.579905	0.577955	0.573015
291	0.556228	0.561479	0.569603	0.571617	0.57621	0.578026	0.580274	0.580377	0.578504	0.573738
292	0.556265	0.56156	0.569837	0.571792	0.576362	0.578252	0.580503	0.580394	0.578891	0.574068
293	0.555641	0.560768	0.569206	0.571315	0.575867	0.577706	0.579853	0.579998	0.578502	0.573658
294	0.554374	0.559482	0.567727	0.570003	0.574432	0.576379	0.578685	0.578793	0.577275	0.572725
295	0.551962	0.557125	0.565453	0.567831	0.572381	0.574285	0.576351	0.576417	0.574967	0.570571
296	0.548544	0.553765	0.562044	0.56416	0.568692	0.570794	0.572881	0.573056	0.571594	0.567358
297	0.544289	0.549474	0.557654	0.559864	0.564412	0.566523	0.568568	0.568717	0.567609	0.563228
298	0.539172	0.544405	0.552581	0.554815	0.559373	0.561514	0.563409	0.563671	0.5626	0.558472
299	0.534194	0.5392	0.547248	0.549338	0.553904	0.55597	0.558433	0.558565	0.557321	0.553393
300	0.52848	0.533536	0.541831	0.543868	0.548517	0.550348	0.552527	0.552728	0.551701	0.547714
301	0.522496	0.527562	0.535486	0.537675	0.542319	0.544205	0.546314	0.546598	0.545485	0.541928
302	0.516442	0.521483	0.529229	0.531445	0.536024	0.538018	0.539827	0.540078	0.539062	0.535638
303	0.510072	0.514883	0.52279	0.524745	0.529312	0.531097	0.533341	0.533563	0.532718	0.529225
304	0.503423	0.508237	0.515923	0.517971	0.522607	0.524406	0.526412	0.526671	0.526013	0.522446
305	0.495906	0.500842	0.508368	0.510496	0.514795	0.516864	0.518926	0.519046	0.518319	0.514998
306	0.488093	0.492885	0.500328	0.502347	0.506809	0.508625	0.510434	0.510759	0.510177	0.507011
307	0.47969	0.48429	0.491762	0.493705	0.498086	0.500077	0.502042	0.50229	0.501522	0.498452
308	0.470565	0.47508	0.482397	0.484367	0.48883	0.490496	0.492416	0.492683	0.492316	0.489151
309	0.461079	0.465392	0.472547	0.474374	0.478536	0.480573	0.482283	0.482533	0.482217	0.479226
310	0.450335	0.454842	0.461872	0.463558	0.46783	0.46965	0.471424	0.471566	0.47116	0.468633
311	0.439431	0.443517	0.450494	0.452123	0.456291	0.458169	0.459638	0.459982	0.459846	0.457121
312	0.427509	0.431948	0.438282	0.440236	0.444038	0.44582	0.447504	0.447797	0.447678	0.445247
313	0.415146	0.419407	0.425705	0.427499	0.431481	0.433067	0.434734	0.43496	0.434971	0.432396
314	0.402298	0.406316	0.412494	0.414103	0.41786	0.41959	0.421312	0.42159	0.42145	0.419282
315	0.389115	0.393001	0.399025	0.400413	0.404278	0.405842	0.407477	0.407721	0.407659	0.405748
316	0.375509	0.379277	0.385019	0.386317	0.390028	0.391452	0.393135	0.393481	0.393375	0.391665
317	0.361422	0.364896	0.370437	0.371876	0.375621	0.377063	0.378584	0.378643	0.379143	0.377293
318	0.347547	0.351163	0.35642	0.357689	0.361217	0.362734	0.364065	0.364361	0.364538	0.362928
319	0.333142	0.336467	0.341508	0.342763	0.346134	0.347539	0.349045	0.349265	0.349408	0.348097
320	0.318749	0.322001	0.326943	0.328254	0.331298	0.332678	0.33399	0.334227	0.334545	0.333427
321	0.304418	0.307662	0.312325	0.313336	0.316339	0.317704	0.319213	0.319333	0.319644	0.318426
322	0.289977	0.293027	0.297394	0.29849	0.301419	0.302574	0.303862	0.304188	0.304547	0.303217
323	0.27579	0.278597	0.282629	0.283665	0.286658	0.287677	0.28898	0.289261	0.289585	0.288392
324	0.26161	0.264176	0.268304	0.269137	0.27198	0.272967	0.27427	0.274292	0.274927	0.273984
325	0.247204	0.249673	0.253597	0.254592	0.257072	0.258183	0.259127	0.259361	0.259858	0.258988
326	0.233672	0.236375	0.239698	0.240618	0.243054	0.243859	0.245035	0.245292	0.245704	0.244894
327	0.219916	0.222311	0.225461	0.226108	0.228462	0.229482	0.230521	0.230583	0.231071	0.230537
328	0.206247	0.208618	0.211794	0.212301	0.21446	0.215306	0.216413	0.216472	0.217051	0.21656
329	0.193226	0.195281	0.198185	0.19864	0.200682	0.201625	0.202383	0.202651	0.203384	0.202666
330	0.18036	0.182451	0.184758	0.185612	0.187399	0.188294	0.189011	0.18917	0.189759	0.189371
331	0.168248	0.169944	0.172315	0.172832	0.174696	0.175423	0.176176	0.176426	0.177072	0.176406
332	0.156032	0.157805	0.160101	0.160547	0.162203	0.162995	0.163536	0.163635	0.164158	0.163916
333	0.144466	0.146189	0.148238	0.148711	0.150033	0.150508	0.151442	0.151589	0.152148	0.151811
334	0.133795	0.135107	0.137007	0.137376	0.138776	0.139344	0.139969	0.140128	0.140578	0.140335
335	0.123125	0.124426	0.126226	0.126535	0.127871	0.128215	0.128814	0.128941	0.129659	0.129372
336	0.113082	0.114462	0.115919	0.116237	0.117514	0.117989	0.118325	0.118653	0.119155	0.118885
337	0.104036	0.105261	0.10661	0.106713	0.107846	0.108274	0.108868	0.108965	0.109515	0.109337
338	0.0952753	0.0964451	0.0975923	0.0978918	0.0990586	0.0993183	0.0996613	0.0997729	0.100281	0.100156
339	0.0871663	0.0883999	0.089341	0.0894119	0.0903387	0.0907124	0.0911498	0.0912889	0.0916854	0.0916688
340	0.0821685	0.083031	0.0839725	0.0842551	0.0850579	0.0854801	0.0856453	0.085894	0.0862511	0.0863535
341	0.0752806	0.0762739	0.077195	0.0770089	0.0778485	0.0781641	0.0784606	0.0787834	0.079082	0.0790756
342	0.0691294	0.0699769	0.0706082	0.0707055	0.0715797	0.0717201	0.0720393	0.0720344	0.0725019	0.0726256
343	0.0634107	0.0642279	0.0649086	0.0648548	0.0656997	0.0658355	0.0660508	0.0661781	0.0664847	0.0665582
344	0.0581727	0.05909	0.0596251	0.0595722	0.060116	0.0604249	0.0606035	0.0606775	0.060923	0.0610827
345	0.0535019	0.05431	0.0545922	0.054793	0.0553852	0.0556607	0.0557499	0.0558678	0.0560439	0.0559812
346	0.0492958	0.0502374	0.0501935	0.0503815	0.050902	0.0510755	0.0511894	0.051233	0.0515044	0.0516651
347	0.0455339	0.0462047	0.0466148	0.046447	0.0471182	0.0471131	0.0473049	0.0472417	0.0476941	0.0477031
348	0.0419737	0.0428316	0.0430893	0.0430822	0.0436472	0.0436462	0.0437731	0.0435975	0.0439097	0.044079
349	0.0389634	0.039521	0.0397945	0.0398891	0.0403658	0.0402088	0.0402993	0.0403257	0.0405852	0.0406176
350	0.0360379	0.0367111	0.0368079	0.0366631	0.0372271	0.0373686	0.0373497	0.0372604	0.0376543	0.0375357
351	0.0335291	0.0342693	0.0341133	0.034161	0.0346368	0.0347255	0.0345533	0.0348089	0.0349177	0.0349951
352	0.0313018	0.0319431	0.0320902	0.0319593	0.0323493	0.0324217	0.0326384	0.0322905	0.0327991	0.0325784
353	0.0294161	0.029788	0.0297874	0.0298606	0.0302464	0.0301072	0.0302765	0.0303067	0.0304337	0.0304685
354	0.0273246	0.027859	0.0278779	0.0278645	0.028028	0.0280844	0.028284	0.0280402	0.0282392	0.0285095
355	0.025488	0.0260127	0.0259133	0.0258502	0.0262031	0.0261114	0.0261006	0.0261145	0.0264447	0.0263799
356	0.0238342	0.0244136	0.0242379	0.024217	0.0243121	0.0243979	0.0244836	0.0244725	0.0247793	0.0245899
357	0.0223516	0.0228337	0.0227192	0.0226702	0.0228377	0.0228117	0.0228398	0.0227723	0.0230623	0.0231015
358	0.0208264	0.0214321	0.0212019	0.0211741	0.0215331	0.0213554	0.021343	0.0213494	0.0215508	0.0215449
359	0.019611	0.0198426	0.0197528	0.0195544	0.0198628	0.0198927	0.0200194	0.0200687	0.0201725	0.0200981
360	0.0182767	0.0185421	0.0184747	0.0182782	0.0185819	0.0184725	0.0184442	0.0185638	0.0186136	0.0188797
361	0.0171769	0.0174454	0.0173596	0.0170814	0.0172894	0.0173091	0.0173169	0.0172457	0.0175013	0.0174463
362	0.0156564	0.0161818	0.0160362	0.0157697	0.0163121	0.0159225	0.0159935	0.0159744	0.0162955	0.0162667
363	0.0146551	0.0150455	0.0148866	0.0146136	0.0148271	0.0148908	0.014779	0.0148549	0.0149142	0.0149607
364	0.0136749	0.0139561	0.0138573	0.0137553	0.0137513	0.0136204	0.0137693	0.0138511	0.0138619	0.0140499
365	0.0128146	0.013024	0.01267	0.0126581	0.0129952	0.0129266	0.0128109	0.0126256	0.0129871	0.0129823
366	0.01177	0.0121874	0.0118588	0.0117453	0.0118707	0.0119365	0.0116876	0.011666	0.011831	0.0120419
367	0.0107597	0.0111873	0.010745	0.010855	0.0108734	0.0109636	0.0108094	0.0109566	0.0109519	0.0109659
368	0.0100336	0.0103703	0.00999468	0.00990778	0.0100914	0.00994023	0.00995494	0.00980049	0.00998244	0.0100529
369	0.00886887	0.00931587	0.00889855	0.00884506	0.00906134	0.00888743	0.00895178	0.00895185	0.00906415	0.00924254
370	0.00827255	0.00855003	0.00842526	0.00806354	0.00823519	0.00803199	0.0081445	0.00801814	0.00829084	0.00843549
371	0.00746712	0.00806511	0.00762263	0.00754854	0.00754933	0.00749868	0.00756246	0.0074107	0.00769842	0.00770542
372	0.00688687	0.00729284	0.00685448	0.00665554	0.00692244	0.00690512	0.00675501	0.00673243	0.00682983	0.00671671
373	0.00605577	0.00629195	0.00600002	0.00581077	0.00574135	0.00570693	0.00562604	0.00566317	0.00591879	0.00590647
374	0.00517385	0.00543049	0.00500278	0.00496045	0.00505195	0.00497166	0.00495794	0.00494815	0.00507906	0.00501199
375	0.0044036	0.00468699	0.00434976	0.00407816	0.00419875	0.00402428	0.00383912	0.00394858	0.00410756	0.00422847
376	0.00353449	0.00406183	0.00354827	0.00338602	0.00355358	0.003377	0.00318992	0.00324708	0.00333759	0.00340498
377	0.00292913	0.00311228	0.00258298	0.00252648	0.00258211	0.00254717	0.00261884	0.00257749	0.00282708	0.00265177
378	0.00218771	0.00232934	0.00178743	0.00179697	0.00172783	0.00171162	0.00172788	0.00168065	0.00189515	0.00203002
379	0.00149762	0.00185503	0.0014307	0.00113661	0.00148159	0.00124966	0.00115748	0.00091828	0.00126783	0.00147392
380	0.00119239	0.00150634	0.00110852	0.000941384	0.000947251	0.000736046	0.000845873	0.00065636	0.000964631	0.00108335
381	0.000683515	0.000941013	0.000425903	0.000227071	0.00027587	0.000289027	0.000364448	0.000316682	0.00010681	0.000314795
382	0.000147209	0.00031445	-0.00040497	-0.000370769	-0.000563352	-0.000609428	-0.000445513	-0.000516775	-0.000217025	-0.000376816
383	-0.000513521	-0.000342828	-0.000695734	-0.000937918	-0.000877125	-0.00112282	-0.00107883	-0.00116576	-0.000961926	-0.000893067
384	-0.00103378	-0.000804762	-0.00135185	-0.0015218	-0.00146752	-0.00160138	-0.00171445	-0.00156515	-0.00138415	-0.00119752
385	-0.00174639	-0.00148321	-0.00195591	-0.00212406	-0.00195616	-0.00216425	-0.00228849	-0.00225498	-0.00191808	-0.00203222
386	-0.00207664	-0.00183267	-0.00228006	-0.00273154	-0.00263329	-0.00257777	-0.00241278	-0.00274589	-0.00246241	-0.00251863
387	-0.00247285	-0.00240556	-0.0028481	-0.00314884	-0.00282818	-0.00318676	-0.00337922	-0.00313519	-0.00311086	-0.00293035
388	-0.00315429	-0.00281668	-0.00327455	-0.00383372	-0.00370792	-0.00376285	-0.00365233	-0.00413346	-0.00333944	-0.00372149
389	-0.00359372	-0.00368247	-0.00382004	-0.00460137	-0.00440631	-0.00483794	-0.00427183	-0.00471405	-0.00388657	-0.00450294
390	-0.0046265	-0.0043507	-0.00465688	-0.00487111	-0.00496235	-0.00487293	-0.00512926	-0.00521975	-0.00501453	-0.00498873
391	-0.0048411	-0.00483158	-0.00515226	-0.00546319	-0.00531118	-0.00532813	-0.00541856	-0.00561651	-0.0055055	-0.00523773
392	-0.00523956	-0.0050809	-0.00558878	-0.00566139	-0.00578264	-0.00568249	-0.00584318	-0.00599402	-0.00589569	-0.00542771
393	-0.00545675	-0.00524333	-0.00588188	-0.00614861	-0.0058925	-0.00607154	-0.00608558	-0.00629094	-0.0060217	-0.00589817
394	-0.00556239	-0.00521676	-0.005837	-0.00596893	-0.00599177	-0.00639705	-0.00623398	-0.00627083	-0.00628051	-0.00609905
395	-0.00588642	-0.00558451	-0.00608692	-0.00637122	-0.00629094	-0.00643175	-0.00615962	-0.00655034	-0.00647571	-0.00630115
396	-0.00579654	-0.00577134	-0.00656265	-0.00664943	-0.00667281	-0.00669024	-0.00689661	-0.00668443	-0.00676601	-0.00657745
397	-0.00623659	-0.005991	-0.00657861	-0.00694518	-0.0070555	-0.0068997	-0.0071512	-0.0071232	-0.00691351	-0.00694826
398	-0.00657719	-0.00618723	-0.00691017	-0.0070886	-0.00718138	-0.0075149	-0.00743463	-0.00751217	-0.00752299	-0.00719933
399	-0.00658264	-0.00664452	-0.0070289	-0.00715895	-0.00736404	-0.00741707	-0.00739831	-0.00740143	-0.00747488	-0.00726804
400	-0.00632438	-0.00657546	-0.00712498	-0.00698738	-0.0072799	-0.00744782	-0.00731568	-0.00735151	-0.00733591	-0.00704328
401	-0.0066824	-0.00628563	-0.00695102	-0.00714634	-0.00695239	-0.00711679	-0.00723614	-0.00736106	-0.00721464	-0.00697005
402	-0.00649862	-0.00622625	-0.00671673	-0.00703072	-0.00698883	-0.00723126	-0.00741084	-0.00748889	-0.00713644	-0.00712664
403	-0.00663233	-0.00623005	-0.00682823	-0.00717139	-0.00706973	-0.00734856	-0.00750286	-0.00728993	-0.00724183	-0.00730494
404	-0.00666433	-0.0066529	-0.00711778	-0.00716152	-0.00745846	-0.00734532	-0.00743142	-0.007567	-0.00733845	-0.00738012
405	-0.00677273	-0.00653238	-0.00733914	-0.00724332	-0.00753981	-0.00765602	-0.00769551	-0.00751268	-0.00764701	-0.00751439
406	-0.00662809	-0.00637379	-0.00701172	-0.00721591	-0.00732269	-0.00719095	-0.00747086	-0.00740129	-0.00724832	-0.00712105
407	-0.00627021	-0.00601075	-0.00677123	-0.00673898	-0.00681928	-0.0069304	-0.00724869	-0.00735979	-0.00699321	-0.00697609
408	-0.00633293	-0.00600873	-0.00671216	-0.00681203	-0.00690904	-0.00727322	-0.00723682	-0.00738021	-0.0071125	-0.00719404
409	-0.00620443	-0.00613042	-0.00704401	-0.00704767	-0.00700058	-0.00708593	-0.00718043	-0.00720519	-0.00720485	-0.00715699
410	-0.00600562	-0.00618491	-0.00669737	-0.00684071	-0.00683135	-0.00690566	-0.00714542	-0.00718099	-0.00709196	-0.00707973
411	-0.0062179	-0.00614214	-0.00659953	-0.00699743	-0.00712782	-0.00706587	-0.00713825	-0.00735978	-0.00701005	-0.00710764
412	-0.00646594	-0.00611096	-0.00676663	-0.00701601	-0.00676868	-0.00724347	-0.00725579	-0.00742794	-0.00711121	-0.00717403
413	-0.00627148	-0.00606981	-0.0068114	-0.00674868	-0.00688951	-0.00712188	-0.00709313	-0.00720077	-0.00713816	-0.00719838
414	-0.00604836	-0.00632623	-0.00685639	-0.00708981	-0.00687614	-0.00689999	-0.0071653	-0.00695201	-0.0072606	-0.00710653
415	-0.00623106	-0.00603167	-0.0065932	-0.00697384	-0.00709457	-0.00698072	-0.00691564	-0.00720777	-0.0068976	-0.00698345
416	-0.00640564	-0.00607844	-0.00643796	-0.00689758	-0.00692874	-0.00695726	-0.00717493	-0.0070916	-0.00715442	-0.00698246
417	-0.00609819	-0.00602315	-0.00674075	-0.00691514	-0.0069304	-0.00698993	-0.00719267	-0.00717469	-0.00693274	-0.00701357
418	-0.00620172	-0.00594196	-0.00671457	-0.00644439	-0.00670774	-0.00720681	-0.00685374	-0.00719639	-0.00705767	-0.00708131
419	-0.00602341	-0.00603123	-0.00662942	-0.00689534	-0.00685268	-0.00685736	-0.00709945	-0.00674867	-0.00701193	-0.00689466
420	-0.00611081	-0.00593464	-0.006762	-0.00705076	-0.00707849	-0.00700953	-0.00725311	-0.00708907	-0.00708098	-0.00693744
421	-0.00636828	-0.0062862	-0.00662389	-0.00704063	-0.0069007	-0.00684599	-0.00749405	-0.00744292	-0.00717319	-0.00707665
422	-0.0064253	-0.00583367	-0.00658022	-0.00703735	-0.00677366	-0.0071513	-0.00686832	-0.00755913	-0.00703881	-0.00710232
423	-0.00608882	-0.0058611	-0.00662586	-0.00647544	-0.00652467	-0.00674165	-0.00694564	-0.00704867	-0.0070359	-0.00703815
424	-0.00570778	-0.00570915	-0.00636638	-0.00649813	-0.00654174	-0.00630216	-0.00690714	-0.00662193	-0.00683788	-0.00646627
425	-0.00554992	-0.0054125	-0.00586111	-0.00647925	-0.00672628	-0.00629802	-0.00657364	-0.00660471	-0.00652398	-0.00634687
426	-0.00578405	-0.00532877	-0.00604326	-0.00614523	-0.00621481	-0.00680459	-0.00647204	-0.00670966	-0.00633129	-0.00663879
427	-0.00590134	-0.00536233	-0.00602889	-0.00623511	-0.00600174	-0.00665142	-0.00656929	-0.00636802	-0.006456	-0.0065566
428	-0.00533982	-0.00564982	-0.00617986	-0.00615228	-0.00645328	-0.00658205	-0.0064744	-0.00636468	-0.00665334	-0.00643435
429	-0.00556597	-0.00560816	-0.00618504	-0.00648218	-0.00660027	-0.00642701	-0.00687275	-0.00657813	-0.00670652	-0.00643423
430	-0.00577641	-0.00558487	-0.00615662	-0.00640913	-0.00621125	-0.00659287	-0.0065979	-0.00695801	-0.00664857	-0.00658965
431	-0.00547418	-0.00492959	-0.00595344	-0.00598563	-0.00589829	-0.0063268	-0.0061145	-0.00664755	-0.00628473	-0.00601596
432	-0.00513491	-0.00480882	-0.00539265	-0.0053508	-0.00556438	-0.00568175	-0.00579045	-0.00563279	-0.0057162	-0.00603914
433	-0.00486891	-0.00509253	-0.00564536	-0.00573303	-0.00596279	-0.00604801	-0.00596689	-0.00583134	-0.00592147	-0.00592137
434	-0.00507626	-0.00530045	-0.00618975	-0.00608314	-0.0058706	-0.00574289	-0.00614362	-0.00574763	-0.00623988	-0.00569896
435	-0.00154656	-0.00139371	-0.0020167	-0.00198259	-0.00214891	-0.00234104	-0.002331	-0.00217681	-0.00225967	-0.00233154
436	-0.00140488	-0.00127822	-0.00191035	-0.00189869	-0.0020098	-0.00234641	-0.00226889	-0.00212143	-0.00219342	-0.00225497
437	-0.00139652	-0.00117926	-0.00184144	-0.00185917	-0.0019346	-0.00222306	-0.00215934	-0.00207804	-0.00215944	-0.00221066
438	-0.00135875	-0.00117062	-0.00182365	-0.00181701	-0.00196551	-0.00215323	-0.00214137	-0.00209014	-0.00212681	-0.00217567
439	-0.00135526	-0.00120259	-0.00185037	-0.00186874	-0.00196874	-0.00215986	-0.00223578	-0.00210385	-0.00220025	-0.00228237
440	-0.00130039	-0.00113166	-0.00182102	-0.00173912	-0.00196028	-0.0022073	-0.00212699	-0.00207753	-0.0020606	-0.00214008
441	-0.00123442	-0.00104416	-0.00168852	-0.00167404	-0.00184283	-0.00211156	-0.00206432	-0.00193047	-0.00199088	-0.00212534
442	-0.00117557	-0.00109649	-0.00162391	-0.00164273	-0.00175461	-0.00199135	-0.00199706	-0.00189619	-0.00191051	-0.00208098
443	-0.00107128	-0.000904659	-0.00153323	-0.00155107	-0.00169206	-0.00186373	-0.00178623	-0.00174501	-0.00184364	-0.00188544
444	-0.00103411	-0.000850992	-0.00147471	-0.00140557	-0.00165824	-0.00182815	-0.0017795	-0.0016711	-0.00183303	-0.00188473
445	-0.000989101	-0.000772889	-0.00146111	-0.00148491	-0.00167283	-0.00184751	-0.0017572	-0.00173459	-0.00182629	-0.00187666
446	-0.000942854	-0.000786992	-0.00146569	-0.00137953	-0.00158065	-0.00184179	-0.0017171	-0.00168656	-0.0017472	-0.00180348
447	-0.000898288	-0.000740732	-0.00132678	-0.00134413	-0.00152585	-0.00172931	-0.00167823	-0.00158838	-0.0016337	-0.00174591
448	-0.000766968	-0.000628084	-0.00128956	-0.00126032	-0.00142605	-0.00164793	-0.00160862	-0.00153526	-0.00162448	-0.00164069
449	-0.000686544	-0.000558308	-0.00117094	-0.00118618	-0.00129608	-0.00154541	-0.00154324	-0.00142576	-0.00147761	-0.00160034
450	-0.000601387	-0.000460382	-0.00106644	-0.00109593	-0.00121113	-0.00142798	-0.00141753	-0.00130633	-0.00134666	-0.00148588
451	-0.000573986	-0.000435199	-0.000998062	-0.000993425	-0.0011408	-0.0013806	-0.00135764	-0.00126141	-0.00124066	-0.00131431
452	-0.000474643	-0.000334397	-0.00093467	-0.000938321	-0.00105755	-0.00130202	-0.0012225	-0.00118232	-0.00119746	-0.0012753
453	-0.000367685	-0.000208628	-0.00083107	-0.000836942	-0.000961278	-0.00123764	-0.00118908	-0.00109283	-0.0011738	-0.00119638
454	-0.000400013	-0.00017524	-0.000868736	-0.000756072	-0.000921579	-0.00126965	-0.00116917	-0.00104623	-0.00111883	-0.00122227
455	-0.000327294	-0.000194621	-0.000831856	-0.000771799	-0.000992098	-0.00119286	-0.00118226	-0.00102135	-0.00112486	-0.00114715
456	-0.000304916	-0.000160013	-0.000768739	-0.000722736	-0.000979048	-0.00115838	-0.00111656	-0.00103084	-0.00105432	-0.00116667
457	-0.000196735	-3.9797e-05	-0.000761768	-0.000643995	-0.000830659	-0.00104052	-0.000984143	-0.000889178	-0.00098513	-0.00106735
458	-0.000212036	-7.53669e-05	-0.000701552	-0.000586917	-0.000766803	-0.000960474	-0.000928062	-0.000867277	-0.000950805	-0.00101799
459	-0.000114654	0.000112584	-0.000527922	-0.00052328	-0.000652192	-0.000919913	-0.000834655	-0.000719916	-0.000860461	-0.000953951
460	-4.92431e-06	0.00019906	-0.000482426	-0.000362312	-0.000562862	-0.000810787	-0.00070893	-0.000604876	-0.000740368	-0.00078942
461	7.91987e-05	0.000283823	-0.000400633	-0.000337208	-0.000531306	-0.000763315	-0.000686026	-0.000587987	-0.000665196	-0.000805803
462	0.000130935	0.000342249	-0.000272696	-0.000227242	-0.00042113	-0.000628108	-0.00054838	-0.000515497	-0.00061858	-0.000652294
463	0.000252188	0.00038888	-0.000179905	-0.000226746	-0.000386449	-0.000561396	-0.000536267	-0.000402006	-0.000490695	-0.000596297
464	0.0002757	0.000427698	-0.00018935	-9.41173e-05	-0.00032986	-0.000531255	-0.000481532	-0.000387997	-0.000442521	-0.000553176
465	0.000334071	0.000503844	-0.00012804	-8.05965e-05	-0.000268509	-0.000450462	-0.000419944	-0.000354063	-0.000406068	-0.000529263
466	0.00030964	0.000485203	-0.000189923	-9.77586e-05	-0.000259836	-0.000550725	-0.000463183	-0.000360312	-0.00047138	-0.000515375
467	0.000362919	0.000464114	-0.0001165	-3.92466e-05	-0.000231093	-0.000492379	-0.000410751	-0.000333453	-0.000429665	-0.000471788
468	0.000420479	0.000549158	-4.49586e-05	1.87604e-05	-0.00015952	-0.000371211	-0.000358172	-0.000251867	-0.000324189	-0.000403857
469	0.000512274	0.000676329	-2.1029e-05	5.34697e-05	-5.06863e-05	-0.000300071	-0.000247162	-8.68653e-05	-0.000249089	-0.000359393
470	0.000538001	0.000715775	0.000146582	0.000183522	1.65532e-05	-0.000227278	-0.000163591	-7.90885e-05	-0.000250645	-0.000260377
471	0.00061842	0.000767853	0.000149772	0.000226228	6.83373e-05	-0.000137923	-6.30031e-05	-3.84882e-05	-0.000133525	-0.000314595
472	0.000689515	0.000874921	0.000286749	0.000342051	0.000140219	-2.86006e-05	2.88349e-05	6.94199e-05	1.22261e-05	-0.000159852
473	0.000785566	0.000933165	0.00038904	0.000324135	0.000232336	-1.215e-05	1.11306e-05	0.000136156	6.18767e-06	-5.80647e-05
474	0.000836657	0.00101295	0.000420862	0.000502652	0.000267667	2.80697e-05	0.000128272	0.000178358	0.000160607	5.8277e-06
475	0.000859284	0.00103296	0.00048755	0.000473794	0.000272404	9.54824e-05	0.000125393	0.000268002	0.000162524	4.54555e-05
476	0.000938968	0.00110302	0.000502531	0.000520396	0.00035262	0.000233866	0.000211514	0.000342182	0.000260869	0.000135912
477	0.000997353	0.00117727	0.000588403	0.000636116	0.000480872	0.000282659	0.000291215	0.000424669	0.000299177	0.000230388
478	0.00113798	0.00125589	0.000652037	0.000767975	0.00056795	0.000314851	0.000381475	0.000417536	0.000329639	0.0002561
479	0.0010731	0.00126826	0.000705027	0.000747701	0.00061306	0.00031448	0.000421024	0.000493603	0.000368689	0.000333077
480	0.00100894	0.00121076	0.000605484	0.000692796	0.000493698	0.000288512	0.00030503	0.000389311	0.000367201	0.000250088
481	0.00110728	0.00127752	0.000683001	0.000699485	0.000569464	0.000335608	0.000377006	0.000517408	0.000419844	0.000293866
482	0.0011487	0.00135019	0.000754231	0.000791463	0.000633648	0.000390162	0.000440223	0.000597272	0.000422464	0.000365282
483	0.00118146	0.00128665	0.000731083	0.000784704	0.000598568	0.00040465	0.000432107	0.000546851	0.000481979	0.000340541
484	0.00121024	0.00128762	0.000775922	0.000870207	0.000711558	0.000411904	0.000457766	0.000590631	0.000522684	0.000407352
485	0.0012695	0.00140962	0.000831607	0.000877664	0.000734854	0.000504156	0.000528006	0.000668567	0.000603626	0.000415592
486	0.0013372	0.00150594	0.000870729	0.000882961	0.000684911	0.000562564	0.000620863	0.000737336	0.000583646	0.000471421
487	0.00140278	0.00154699	0.000901198	0.000995204	0.000770922	0.000642963	0.000686568	0.000765228	0.00066964	0.000592285
488	0.00140802	0.00165572	0.000939269	0.00100767	0.000842353	0.000629978	0.000691699	0.000758529	0.000763677	0.000591723
489	0.00147235	0.00165871	0.00100081	0.0010716	0.000939593	0.000726877	0.000753857	0.000869369	0.000733659	0.000626895
490	0.00152617	0.00165374	0.00109571	0.00116567	0.000928088	0.000752466	0.000841828	0.000924671	0.000858068	0.000673913
491	0.00155154	0.00169386	0.00115029	0.00119355	0.000956898	0.000767552	0.000838894	0.000971459	0.000817802	0.000733941
492	0.00159338	0.00174767	0.00118773	0.00124234	0.00107174	0.000867194	0.000934095	0.00101492	0.000868778	0.000805056
493	0.00162893	0.00172523	0.00117514	0.00126811	0.00113243	0.000901509	0.000988919	0.000944295	0.000894923	0.000817187
494	0.00166493	0.00181279	0.00125725	0.00131817	0.00107902	0.000884631	0.000938557	0.00107382	0.000928504	0.000840713
495	0.00166809	0.00184132	0.00128047	0.00132325	0.00111734	0.000943871	0.000972497	0.00108152	0.000992308	0.000833943
496	0.00175177	0.00190185	0.0013214	0.00139323	0.00115716	0.00097001	0.00100042	0.00115701	0.00106997	0.00093465
497	0.00179839	0.001974	0.0013311	0.00145702	0.00121274	0.000993769	0.00107406	0.00117206	0.00105722	0.000920474
498	0.00179563	0.00200161	0.00138684	0.00147569	0.00126422	0.00109169	0.00112978	0.0013051	0.00109719	0.00103522
499	0.00190034	0.0020807	0.00149507	0.00152963	0.00134242	0.00116417	0.00116129	0.00128305	0.00121223	0.00109213
500	0.00160819	0.00183817	0.00121256	0.00127403	0.00114927	0.000874014	0.000940682	0.0010357	0.000971493	0.000785916
Pyridine Guest (Replicate 1)					Concentration of macrocycle = 10.4 µM in THF (200 ppm water (11.1 mM), 3.00 mL total volume); concentration of pyridine guest solution = 7.45 mM in THF (200 ppm water, 11.1 mM). A total of 205 µL of pyridine guest solution was added (49.0 equivalents w.r.t. macrocycle and 73 equivalents of water).
	before each spectrum added…
Guest aliquot added:	(+0 µM)	(+5 µM)	(+5 µM)	(+5 µM)	(+10 µM)	(+10 µM)	(+10 µM)	(+20 µM)	(+40 µM)	(+50 µM)	(+50 µM)																[Macro]	[Pyridine]	[Guest]/[Host]	A295
Wavelength (nm)	Abs (1)	Abs (2)	Abs (3)	Abs (4)	Abs (5)	Abs (6)	Abs (7)	Abs (8)	Abs (9)	Abs (10)	Abs (11)																1.04e-05	0	0	0.53922
250	0.499849	0.499169	0.503908	0.518121	0.556494	0.59995	0.645531	0.748546	0.951116	1.19714	1.43374																1.03827e-05	1.2396e-05	1.19391	0.540032
251	0.50283	0.503899	0.510424	0.526105	0.56632	0.61134	0.659058	0.764263	0.972029	1.22432	1.46628																1.03654e-05	2.47508e-05	2.38782	0.544708
252	0.508344	0.510655	0.518364	0.534963	0.576047	0.621538	0.669798	0.774799	0.982963	1.23557	1.4779																1.03483e-05	3.70647e-05	3.58173	0.551072
253	0.515983	0.519188	0.527891	0.544913	0.585995	0.631481	0.679286	0.783173	0.987656	1.23583	1.47442																1.0314e-05	6.15702e-05	5.96955	0.554965
254	0.52588	0.529794	0.539261	0.556767	0.597725	0.642653	0.690414	0.791982	0.993483	1.23688	1.47052																1.02801e-05	8.59143e-05	8.35737	0.558617
255	0.537316	0.542284	0.552664	0.570914	0.612243	0.657433	0.70504	0.806514	1.00586	1.24761	1.47991																1.02463e-05	0.000110099	10.7452	0.563663
256	0.550251	0.556491	0.567986	0.586956	0.629015	0.674734	0.723111	0.823996	1.02362	1.26503	1.49667																1.01794e-05	0.000157993	15.5208	0.563951
257	0.564242	0.571014	0.583592	0.603099	0.645086	0.690956	0.738907	0.83833	1.03514	1.27277	1.5005																1.00483e-05	0.000251932	25.0721	0.562625
258	0.578448	0.585372	0.597962	0.617485	0.658309	0.702526	0.749049	0.844778	1.03337	1.26044	1.47828																9.88906e-06	0.000366006	37.0112	0.555559
259	0.592928	0.599489	0.611909	0.630803	0.669474	0.711234	0.755456	0.84499	1.02205	1.23378	1.43721																9.73479e-06	0.000476521	48.9503	0.549723
260	0.606512	0.613161	0.625026	0.643289	0.679554	0.719081	0.760753	0.844433	1.00931	1.20664	1.39567
261	0.619417	0.625921	0.637615	0.655365	0.69039	0.727805	0.767693	0.846888	1.00242	1.18831	1.36715
262	0.631143	0.637562	0.649595	0.667292	0.701296	0.737723	0.776586	0.852323	1.00168	1.17986	1.35132
263	0.641374	0.647985	0.660126	0.677781	0.711029	0.746473	0.784203	0.856938	1.00062	1.17128	1.33547
264	0.649568	0.65625	0.668269	0.685668	0.717143	0.751164	0.787161	0.855775	0.990737	1.15059	1.30416
265	0.655659	0.661727	0.673178	0.689623	0.719036	0.750096	0.783663	0.846362	0.969503	1.11444	1.25332
266	0.659266	0.664355	0.675111	0.690328	0.716862	0.745253	0.77576	0.83162	0.941178	1.06953	1.19278
267	0.660303	0.664433	0.674034	0.688243	0.712056	0.737198	0.764649	0.813963	0.909935	1.0213	1.12867
268	0.658246	0.661769	0.67044	0.683559	0.704643	0.727409	0.751755	0.794747	0.878509	0.974839	1.06771
269	0.653996	0.656579	0.664753	0.676835	0.695765	0.715715	0.737718	0.775543	0.848336	0.93154	1.01218
270	0.647074	0.649352	0.65675	0.668074	0.684963	0.702834	0.722807	0.75544	0.818605	0.890429	0.959623
271	0.638527	0.640372	0.647324	0.657977	0.672954	0.689105	0.706977	0.73583	0.790816	0.852493	0.912184
272	0.628724	0.630201	0.636559	0.646509	0.660077	0.674421	0.690745	0.715902	0.763713	0.816566	0.868083
273	0.61777	0.619016	0.624975	0.634424	0.646645	0.65967	0.674544	0.696492	0.738242	0.78342	0.827561
274	0.606568	0.607515	0.61331	0.622185	0.633602	0.645173	0.658641	0.677804	0.714113	0.752707	0.790744
275	0.595321	0.596179	0.601509	0.610161	0.620435	0.631102	0.643455	0.660092	0.691576	0.724333	0.756715
276	0.584618	0.585331	0.590643	0.598876	0.608231	0.617842	0.629214	0.64367	0.670776	0.698228	0.725541
277	0.575099	0.575616	0.580739	0.588613	0.597222	0.606097	0.616488	0.629189	0.652422	0.675218	0.69807
278	0.566535	0.567045	0.571844	0.579443	0.587353	0.595361	0.605134	0.615916	0.635564	0.654436	0.673162
279	0.559015	0.55954	0.564231	0.571603	0.579062	0.58633	0.595358	0.604523	0.62132	0.636357	0.651464
280	0.553365	0.553631	0.558365	0.565517	0.572247	0.578906	0.587488	0.595406	0.60941	0.621035	0.632977
281	0.548803	0.549262	0.553899	0.560976	0.56725	0.573253	0.581209	0.587923	0.599488	0.608143	0.617367
282	0.545579	0.54595	0.550382	0.557319	0.563417	0.568997	0.576435	0.581949	0.591693	0.597663	0.604472
283	0.543563	0.543948	0.548502	0.555383	0.560638	0.566181	0.573072	0.577905	0.585475	0.589288	0.593781
284	0.542411	0.54284	0.547371	0.554079	0.559478	0.564503	0.570906	0.57491	0.581064	0.582842	0.585508
285	0.541601	0.542268	0.546644	0.553422	0.558451	0.563307	0.569732	0.572822	0.577628	0.577756	0.578901
286	0.541177	0.541716	0.546059	0.552576	0.557398	0.562111	0.568233	0.570676	0.574265	0.573056	0.57253
287	0.540467	0.541087	0.545573	0.551987	0.556591	0.560986	0.566965	0.568874	0.571278	0.568741	0.567229
288	0.540059	0.540751	0.545163	0.551631	0.555949	0.560238	0.565948	0.567422	0.569163	0.565486	0.562864
289	0.539937	0.540751	0.545137	0.551662	0.555935	0.559886	0.56539	0.566589	0.567439	0.562923	0.559518
290	0.540444	0.54114	0.545496	0.552029	0.556149	0.560053	0.565326	0.566274	0.566622	0.561214	0.557028
291	0.541224	0.541811	0.546219	0.552643	0.556891	0.560546	0.565952	0.566548	0.566184	0.560321	0.555715
292	0.541807	0.542525	0.546972	0.553395	0.557383	0.561337	0.566322	0.5669	0.566113	0.559782	0.554612
293	0.541786	0.542488	0.547117	0.553394	0.557416	0.561045	0.566233	0.566556	0.565745	0.559023	0.553488
294	0.540899	0.54162	0.546253	0.552678	0.556606	0.560286	0.565502	0.565607	0.564616	0.557548	0.551902
295	0.53922	0.540032	0.544708	0.551072	0.554965	0.558617	0.563663	0.563951	0.562625	0.555559	0.549723
296	0.536477	0.537463	0.541952	0.548443	0.552358	0.556066	0.561022	0.560979	0.560039	0.552912	0.546866
297	0.533228	0.534295	0.538773	0.545077	0.549124	0.552606	0.557696	0.55768	0.556234	0.549094	0.542933
298	0.529031	0.530119	0.534713	0.540904	0.544819	0.548368	0.553333	0.553211	0.551844	0.544614	0.538837
299	0.524392	0.525325	0.52994	0.536229	0.540211	0.543678	0.548702	0.548489	0.547177	0.540092	0.53387
300	0.51933	0.520396	0.524988	0.531185	0.535212	0.538588	0.543566	0.543306	0.542116	0.534843	0.528787
301	0.514233	0.51524	0.519757	0.525905	0.529758	0.53327	0.53824	0.538077	0.53696	0.529675	0.523628
302	0.508884	0.509902	0.514387	0.520469	0.524076	0.528116	0.532622	0.532519	0.53109	0.524193	0.518196
303	0.503083	0.504188	0.508594	0.514574	0.5185	0.521983	0.526637	0.526444	0.52536	0.518138	0.512348
304	0.49688	0.497893	0.502377	0.508391	0.512199	0.515688	0.520293	0.520157	0.518706	0.511771	0.506141
305	0.490061	0.491111	0.495485	0.501163	0.505243	0.50855	0.513062	0.512787	0.51158	0.504709	0.499137
306	0.482747	0.483676	0.488043	0.493806	0.497574	0.500977	0.505291	0.505145	0.503944	0.49712	0.491407
307	0.474736	0.475741	0.480131	0.485777	0.489463	0.4927	0.497308	0.497114	0.495616	0.489134	0.483461
308	0.466256	0.467394	0.471337	0.477084	0.480638	0.483899	0.488138	0.488231	0.486927	0.480218	0.474846
309	0.456788	0.45774	0.461671	0.467563	0.470964	0.474159	0.478342	0.478323	0.476957	0.470589	0.465191
310	0.446679	0.447549	0.451558	0.456961	0.460435	0.463462	0.467704	0.467473	0.466336	0.460065	0.454732
311	0.435637	0.436532	0.440328	0.44588	0.449093	0.452233	0.456447	0.455911	0.454935	0.44886	0.443686
312	0.42446	0.425339	0.42901	0.434336	0.437703	0.440549	0.444695	0.444391	0.443294	0.437229	0.432333
313	0.412573	0.413225	0.416856	0.421966	0.425236	0.428156	0.432243	0.431909	0.430751	0.424883	0.420069
314	0.399727	0.400422	0.404041	0.409158	0.412219	0.415001	0.418862	0.418355	0.417447	0.411871	0.407072
315	0.386633	0.387636	0.391053	0.395761	0.398822	0.40148	0.405277	0.404967	0.404053	0.39842	0.393923
316	0.373442	0.374052	0.377241	0.382079	0.384946	0.387585	0.391289	0.390869	0.390044	0.384693	0.380306
317	0.35966	0.360409	0.363629	0.368229	0.370858	0.373386	0.37694	0.376581	0.375796	0.370694	0.366295
318	0.345709	0.346279	0.349502	0.353702	0.35653	0.358928	0.362222	0.362072	0.361214	0.356301	0.352228
319	0.331445	0.332129	0.334749	0.339229	0.341591	0.344179	0.347378	0.347126	0.346231	0.341589	0.337469
320	0.317181	0.317557	0.320618	0.324694	0.326912	0.329306	0.332533	0.332152	0.331411	0.326985	0.323019
321	0.303093	0.303294	0.305926	0.309912	0.312411	0.314739	0.317619	0.317427	0.316688	0.312168	0.308546
322	0.288751	0.288937	0.291471	0.295594	0.297589	0.299811	0.302457	0.302232	0.301854	0.297377	0.293976
323	0.274631	0.274796	0.277197	0.28086	0.282897	0.285064	0.287862	0.287479	0.287004	0.28275	0.27952
324	0.259538	0.259822	0.261937	0.265736	0.267561	0.269578	0.271912	0.271951	0.271415	0.267456	0.264283
325	0.245946	0.245991	0.248172	0.251728	0.253643	0.255421	0.257795	0.257752	0.257306	0.253573	0.250587
326	0.232233	0.232137	0.234305	0.23768	0.239516	0.241254	0.243458	0.243241	0.242791	0.239473	0.236452
327	0.21879	0.218977	0.220605	0.224039	0.22575	0.227253	0.229322	0.229283	0.228826	0.225539	0.222849
328	0.205405	0.205331	0.20714	0.21027	0.211744	0.213435	0.215354	0.215215	0.214988	0.211863	0.209287
329	0.192055	0.19196	0.193606	0.196552	0.19812	0.199445	0.20145	0.201497	0.20095	0.198026	0.1957
330	0.179102	0.179041	0.180402	0.183349	0.184762	0.18619	0.18789	0.187608	0.187498	0.184767	0.182387
331	0.166834	0.166739	0.168116	0.170964	0.172106	0.173522	0.175113	0.174766	0.174652	0.172051	0.170099
332	0.154973	0.154817	0.156028	0.158715	0.159929	0.161178	0.162757	0.162772	0.162423	0.159952	0.157861
333	0.143476	0.143072	0.144405	0.14692	0.148034	0.149198	0.150539	0.150184	0.150154	0.148079	0.146153
334	0.132528	0.132217	0.133271	0.135648	0.13669	0.137942	0.139103	0.139178	0.138838	0.136769	0.135066
335	0.121824	0.121421	0.12252	0.124969	0.125771	0.126838	0.127867	0.127948	0.12773	0.125939	0.124295
336	0.111873	0.111645	0.112733	0.115056	0.115608	0.116777	0.117688	0.117678	0.117667	0.115898	0.114232
337	0.103021	0.102368	0.103411	0.10539	0.10608	0.107083	0.10819	0.107937	0.107908	0.106237	0.104887
338	0.0941932	0.0938703	0.0945182	0.0965992	0.097269	0.0982684	0.0991336	0.098967	0.0992234	0.0974773	0.0960974
339	0.0861863	0.085543	0.0865464	0.0884466	0.0890006	0.0898793	0.0905694	0.0906011	0.0905715	0.0893135	0.0879406
340	0.0806919	0.0803457	0.0810857	0.0828187	0.0835615	0.0843834	0.0849761	0.0848004	0.0849585	0.0834196	0.0823176
341	0.0742195	0.0734183	0.074169	0.0759401	0.0766097	0.0773587	0.0779325	0.0778566	0.0781014	0.0766154	0.0756732
342	0.0680902	0.0673864	0.067986	0.0698037	0.0703487	0.0710671	0.0715568	0.0716851	0.0717529	0.0705343	0.0695726
343	0.0623443	0.0618028	0.0624364	0.0639431	0.0644482	0.0653636	0.0658705	0.0656098	0.0658458	0.0648324	0.0635893
344	0.0577495	0.0570595	0.0574684	0.0592413	0.0595676	0.0601962	0.0606871	0.0606878	0.0607834	0.0597905	0.0587819
345	0.053028	0.0526006	0.0529869	0.0546682	0.0548652	0.0555892	0.055916	0.0559062	0.0562087	0.0551185	0.0543453
346	0.0490103	0.0481625	0.0487723	0.0503563	0.0506956	0.0513337	0.0517105	0.0515957	0.05181	0.0509661	0.0499489
347	0.0454369	0.04464	0.0450941	0.0467401	0.0469393	0.0475777	0.0478608	0.0478594	0.048029	0.0472121	0.0464424
348	0.041883	0.0414779	0.0417451	0.0432963	0.0432911	0.044184	0.0445335	0.0443787	0.0443582	0.0438698	0.0429898
349	0.0388604	0.0383909	0.0385571	0.0401275	0.0403793	0.0409947	0.0414191	0.0412006	0.0413937	0.040829	0.0398621
350	0.036114	0.0357945	0.0357896	0.0372974	0.0377261	0.0379972	0.0385295	0.0385708	0.0384719	0.0378108	0.0371054
351	0.0337815	0.0332296	0.0334994	0.0347849	0.0348048	0.0355699	0.0359389	0.0358236	0.0361102	0.0352418	0.0346743
352	0.0316832	0.0309685	0.0311648	0.0325566	0.0328731	0.0332497	0.03348	0.03336	0.0337891	0.033173	0.0324605
353	0.0295517	0.0290674	0.0291856	0.0306583	0.0306961	0.0312492	0.0316251	0.0314437	0.0317655	0.031186	0.0305462
354	0.0280612	0.0274716	0.027761	0.0288612	0.0291102	0.0296224	0.0297836	0.0296256	0.0298447	0.0293278	0.028855
355	0.0263605	0.0257337	0.0257635	0.0272579	0.0274118	0.0278602	0.028051	0.0279987	0.0282412	0.0276851	0.0271086
356	0.0246451	0.0242114	0.0242962	0.0255389	0.0256051	0.0264015	0.0264731	0.0264776	0.0265491	0.0260668	0.025573
357	0.0232345	0.0226849	0.022906	0.0241766	0.0240664	0.0247644	0.0248425	0.0247746	0.0250943	0.0246061	0.0239901
358	0.0219841	0.0212971	0.0216156	0.0226855	0.0230175	0.02334	0.0233232	0.0234378	0.0234759	0.0231797	0.0225901
359	0.0207002	0.0198056	0.0203459	0.0213144	0.0214362	0.0218182	0.022083	0.0221792	0.0223008	0.0220022	0.0212713
360	0.0194788	0.0188219	0.0191006	0.0200772	0.0203097	0.0207633	0.0208187	0.0208277	0.0210735	0.0206697	0.0200907
361	0.0183794	0.0177126	0.0179388	0.0189933	0.0190177	0.0195966	0.0195994	0.0198237	0.0199727	0.0193918	0.0190415
362	0.0172159	0.0164182	0.0166207	0.0178587	0.0179868	0.018458	0.0186021	0.0186069	0.0189658	0.0183232	0.0179889
363	0.0160781	0.0150112	0.0150481	0.0167102	0.0167543	0.0172945	0.0174128	0.017243	0.0175655	0.0172108	0.0167497
364	0.0145398	0.0140046	0.0141061	0.0151879	0.0152681	0.0155059	0.0159923	0.0158489	0.0160219	0.0155496	0.0151731
365	0.013673	0.0130025	0.0131982	0.0140812	0.0143696	0.0147406	0.0147222	0.0147397	0.015133	0.0145361	0.0143029
366	0.0127225	0.0121397	0.0124157	0.0134603	0.0133425	0.0139618	0.0139049	0.0137857	0.0142029	0.0137966	0.0134319
367	0.0121075	0.0115088	0.0116252	0.0127652	0.012603	0.0131307	0.0131604	0.0131469	0.0132149	0.0130501	0.0128223
368	0.011541	0.0107985	0.0108714	0.0119272	0.0122469	0.0125265	0.0126426	0.0125821	0.0127121	0.0122743	0.0122451
369	0.0106643	0.0102211	0.010152	0.0111581	0.0115586	0.011791	0.0118626	0.011808	0.0120011	0.0116178	0.0112985
370	0.0100015	0.00926766	0.00946057	0.0107001	0.0105691	0.0109465	0.0110366	0.011024	0.0112822	0.0109495	0.0106195
371	0.00933226	0.00852331	0.00868793	0.00978672	0.0101099	0.0102773	0.0102676	0.0102939	0.0106958	0.0103371	0.00995163
372	0.0087255	0.0082992	0.00835438	0.0094008	0.00936661	0.00978662	0.00974578	0.00972514	0.0103122	0.00959778	0.00928941
373	0.00821895	0.00754549	0.00746971	0.00885094	0.00879587	0.00906922	0.00896311	0.00909301	0.00918712	0.0090708	0.00866865
374	0.00744203	0.00679686	0.00695134	0.00805594	0.00804912	0.00834254	0.00839552	0.00837949	0.00862935	0.00831059	0.00802739
375	0.00688908	0.00621664	0.0062013	0.00707171	0.00734744	0.00760256	0.00766035	0.00754442	0.00781612	0.00762606	0.0072959
376	0.00613233	0.0053982	0.00575049	0.00656738	0.00634989	0.00698152	0.00670429	0.00683926	0.00724253	0.00703155	0.00667941
377	0.00556524	0.00478669	0.00498648	0.00577474	0.00592096	0.00617652	0.00634993	0.00612743	0.00647814	0.00622485	0.00602038
378	0.00479724	0.00415484	0.00405056	0.00528868	0.00529552	0.00564575	0.00551891	0.00548501	0.00570175	0.00558977	0.00518816
379	0.00426164	0.00344789	0.00382831	0.0043932	0.00460484	0.00506312	0.00481552	0.00509374	0.0051375	0.00504655	0.00475062
380	0.00369634	0.00302417	0.00309052	0.00411333	0.00408029	0.00449368	0.00442107	0.00433028	0.00476602	0.00469819	0.00436663
381	0.00320992	0.00272954	0.00263471	0.00367456	0.00377384	0.00407241	0.00412361	0.00418757	0.00430713	0.00422149	0.00404426
382	0.00331581	0.00256345	0.00249908	0.00341267	0.00350156	0.0037955	0.00368498	0.0036706	0.00385952	0.00377553	0.00356669
383	0.00246202	0.00196611	0.00193572	0.00302753	0.00282491	0.00326721	0.00325511	0.00327786	0.00333317	0.00328962	0.00290771
384	0.0024788	0.00164354	0.00158875	0.00236677	0.00266965	0.00285914	0.00295494	0.00285929	0.00340062	0.00287525	0.00267843
385	0.00182582	0.000939763	0.00127007	0.00217882	0.00197739	0.00225309	0.0022606	0.00240586	0.00267963	0.00237995	0.00214124
386	0.00139782	0.000457972	0.00073773	0.00153189	0.00168731	0.00169072	0.00210519	0.0019438	0.00222104	0.00182367	0.00170849
387	0.0010216	0.000436822	0.000270747	0.00114527	0.00111248	0.001339	0.00139918	0.00145411	0.00164448	0.00152587	0.00137467
388	0.000833716	1.27672e-05	-1.23131e-05	0.000784907	0.000856598	0.00112509	0.00110184	0.00112329	0.00130811	0.00144527	0.000917158
389	0.000369961	1.38602e-05	-0.000242043	0.000589287	0.000619295	0.00101704	0.000753782	0.000809827	0.0012078	0.000908997	0.000848893
390	-5.77722e-06	-0.000767293	-0.000599574	0.000270054	0.000476123	0.000788237	0.000530939	0.000502182	0.000919894	0.000706066	0.000454658
391	-0.000404222	-0.000906863	-0.000970062	-0.000141259	-8.03299e-05	-0.000104663	-7.35483e-05	-9.55382e-05	0.00035371	0.000162578	-0.000140512
392	-0.000603889	-0.00109522	-0.00134795	-0.000376368	-0.000337405	-0.000223289	-8.79545e-05	-0.000162381	0.000239322	-0.000144486	8.12739e-06
393	-0.000867743	-0.00134792	-0.00132301	-0.000674703	-0.000651052	-0.000313922	-0.000344618	-0.000288856	3.62881e-06	-0.000220875	-0.000470316
394	-0.0010153	-0.00140105	-0.0016542	-0.00093321	-0.000761468	-0.000450502	-0.00049548	-0.000758133	-0.000105757	-0.000346081	-0.000520234
395	-0.00115876	-0.00173085	-0.00168492	-0.000827069	-0.000837968	-0.00064176	-0.000664461	-0.000528682	-0.000329241	-0.000330437	-0.000860161
396	-0.00130683	-0.00176484	-0.00169452	-0.000985001	-0.000958735	-0.000715046	-0.000848677	-0.000877836	-0.000662826	-0.000819117	-0.000992911
397	-0.00125323	-0.00170677	-0.00213781	-0.00126029	-0.001486	-0.00105858	-0.000897435	-0.000914055	-0.000757035	-0.000911716	-0.000811538
398	-0.00145453	-0.00211611	-0.00223116	-0.00136149	-0.00140935	-0.00112944	-0.00150323	-0.00117251	-0.000866512	-0.00107751	-0.000971454
399	-0.00158994	-0.00239871	-0.00212365	-0.00135213	-0.00148047	-0.00108739	-0.00121734	-0.00139046	-0.000934099	-0.00115667	-0.00131286
400	-0.00125392	-0.00194299	-0.00207905	-0.00133459	-0.00127778	-0.0011434	-0.000865604	-0.000885157	-0.00073572	-0.000903168	-0.000993209
401	-0.00146665	-0.00189403	-0.001817	-0.000926372	-0.00126485	-0.000765667	-0.000978551	-0.000725904	-0.000756112	-0.000781342	-0.000938907
402	-0.00131278	-0.00182848	-0.0021227	-0.00113486	-0.00124742	-0.000930053	-0.00102675	-0.000946867	-0.000678207	-0.000783372	-0.00108563
403	-0.00136944	-0.00201059	-0.00200131	-0.00131074	-0.00127749	-0.00109179	-0.00131173	-0.00103678	-0.00079833	-0.00126098	-0.00102684
404	-0.0015596	-0.00207983	-0.0020125	-0.00141417	-0.00130379	-0.00108035	-0.00120511	-0.00110024	-0.000907742	-0.000836789	-0.00123504
405	-0.00168249	-0.00214421	-0.00233451	-0.00129658	-0.00125925	-0.000979821	-0.00117448	-0.00126363	-0.0010515	-0.00117712	-0.00118627
406	-0.00116817	-0.00216752	-0.0019645	-0.00125999	-0.0013182	-0.000981371	-0.000951524	-0.000865602	-0.000751295	-0.00105881	-0.00103748
407	-0.000890478	-0.00159656	-0.00151564	-0.000898538	-0.000891224	-0.000696403	-0.000757621	-0.000773645	-0.000552282	-0.000537045	-0.000589623
408	-0.000925038	-0.00161046	-0.00131737	-0.000767706	-0.000975828	-0.000346819	-0.000881109	-0.000677419	-0.000246328	-0.000434885	-0.000607277
409	-0.00106393	-0.00160069	-0.00152406	-0.00074743	-0.000647899	-0.000540926	-0.000721653	-0.000752605	-0.000172511	-0.000375759	-0.000453545
410	-0.000964205	-0.00148915	-0.0013399	-0.000856014	-0.000747248	-0.000770188	-0.000497269	-0.000733315	-0.000368587	-0.000439158	-0.000834522
411	-0.000635818	-0.00116306	-0.00138741	-0.00058136	-0.000697337	-0.000418988	-0.000539192	-0.00014838	-0.00022128	-0.000477999	-0.000405542
412	-0.000713784	-0.00126096	-0.00125773	-0.000536959	-0.000912077	-0.000559515	-0.000812917	-0.000619358	-0.000301575	-0.000564742	-0.000392786
413	-0.00100618	-0.00144936	-0.00146744	-0.000666738	-0.000571055	-0.000330757	-0.000647225	-0.000593609	-0.000202957	-0.000110609	-0.000354469
414	-0.000431583	-0.00110558	-0.00130849	-0.000518424	-0.000306617	-0.0003245	-0.000273888	-0.000497214	-0.00021161	-0.000206678	-0.000405338
415	-0.000271007	-0.000601066	-0.000876797	-0.00012118	-0.000122326	9.1868e-05	0.000160232	6.01584e-05	0.000177935	8.51371e-05	0.000121037
416	-9.90302e-05	-0.000729776	-0.000719524	-0.000192569	-0.000164764	2.4291e-05	-0.000113234	1.25755e-05	0.000327213	0.000145254	9.94775e-05
417	-0.000137695	-0.000702924	-0.000905892	-0.000232674	-0.000353287	9.69569e-05	-0.000240746	0.000154506	0.000352345	0.000358782	0.000338175
418	-0.000484876	-0.000619843	-0.000835025	4.14676e-05	-3.63491e-05	1.98409e-06	-0.00017445	0.000282288	0.00026009	0.000266525	0.000436956
419	-0.000242729	-0.000851196	-0.00096436	-4.86335e-05	0.000128847	1.58192e-05	0.00014231	2.50915e-05	0.000229984	0.000261357	-4.90321e-05
420	-0.000540592	-0.00115673	-0.00140571	-0.000615822	-0.000492987	-0.000195434	-0.000354773	-0.000354773	-6.21573e-05	-0.000265893	-0.000136975
421	-0.000306857	-0.000806756	-0.00101953	-0.000318016	-0.000448323	3.21071e-05	-0.000337894	-0.000119541	-0.000140075	-0.000336947	-0.000378691
422	-0.000622566	-0.000860407	-0.000818761	-0.00034464	-0.000440025	2.15587e-05	-0.000494556	3.86602e-05	0.000128318	0.000153304	-4.8156e-06
423	-0.000357642	-0.000936377	-0.000846769	-0.000251417	6.7867e-05	0.000260302	-0.000390969	-8.04643e-05	0.000439198	0.000339187	0.000223235
424	-0.00044289	-0.000912114	-0.000539146	-2.18506e-05	2.14234e-05	-6.74518e-06	0.000257163	0.000243894	0.000366176	0.000449364	-6.94565e-05
425	0.000215835	-0.000437875	-0.000715238	0.00040514	9.39161e-05	0.000349412	0.000408383	0.000288155	8.19508e-05	0.000200524	0.000156392
426	0.000703166	6.17337e-05	-7.69205e-05	0.000533509	0.000245613	0.000533958	0.000410664	0.000558762	0.00070716	0.000527521	0.000660933
427	0.000119866	-0.00047291	-0.000325305	0.000366549	0.000293218	0.000474026	0.000155169	0.000453915	0.000877281	0.000690459	0.000741788
428	-4.19437e-05	-0.000428669	-0.000542097	0.000164866	0.000446028	0.000317297	0.000200974	0.000261925	0.000745803	0.000511256	0.000590672
429	0.000427978	-0.000403584	-0.000587181	0.000449931	0.000163239	0.00029863	0.000678256	0.000651599	0.000532113	0.000571539	0.000236789
430	0.000852204	-0.000159121	-9.9918e-05	0.00024051	0.000468313	0.000707773	0.000793767	0.000814094	0.000883874	0.000494264	0.000593093
431	0.000646205	0.00041265	0.000236085	0.000801165	0.000619993	0.00113665	0.000818147	0.000993907	0.00116214	0.00115389	0.00107107
432	0.000733631	0.000423089	0.000366865	0.00101762	0.000840092	0.00143661	0.000646015	0.00121807	0.00146437	0.00157757	0.0013733
433	0.000771113	0.000377987	0.000641495	0.000928696	0.000967364	0.000996692	0.00102847	0.00100773	0.00164678	0.00112947	0.00133589
434	0.000538976	-3.51187e-05	-0.000190205	0.000332042	0.000663474	0.000728384	0.000878063	0.000892849	0.0011308	0.00121097	0.000656035
435	0.00412825	0.00365034	0.0036323	0.00446527	0.00437578	0.00447295	0.00440964	0.00453473	0.00457257	0.00480568	0.00475784
436	0.00418493	0.00377119	0.0036759	0.00456011	0.00443982	0.00459881	0.00447587	0.00463664	0.00465515	0.00490703	0.00476487
437	0.00427107	0.00384048	0.00374009	0.00463531	0.00450953	0.00465042	0.00453041	0.00468004	0.00473337	0.00494187	0.00484397
438	0.00435979	0.00387388	0.00383024	0.0047332	0.00459387	0.00469934	0.00466537	0.00479729	0.00482535	0.00504565	0.00496781
439	0.00434064	0.003927	0.00392463	0.00470363	0.00468403	0.00477825	0.00473658	0.00483207	0.00483769	0.00509139	0.00501585
440	0.00430431	0.00395842	0.00384875	0.00480189	0.00471968	0.00478571	0.00473286	0.00490737	0.00492093	0.00515379	0.00505286
441	0.00446277	0.00402684	0.0039347	0.00478503	0.00473538	0.0048225	0.00472384	0.0048616	0.00493292	0.00518294	0.00507668
442	0.00449318	0.00411454	0.0039909	0.00488796	0.00482262	0.00488491	0.00482716	0.00494769	0.00498615	0.00518647	0.0051116
443	0.00458727	0.00418844	0.00410653	0.00503223	0.00491916	0.0050499	0.00495956	0.00507483	0.00508701	0.00532307	0.00523293
444	0.00465232	0.0043239	0.00412207	0.00503814	0.00496627	0.00506052	0.005019	0.0051697	0.00523975	0.00538184	0.00535664
445	0.00478214	0.00444268	0.00427439	0.00516554	0.00504768	0.00516743	0.00507692	0.00526682	0.00527883	0.00550965	0.00540919
446	0.00482452	0.00447373	0.00438578	0.00529497	0.00511151	0.00521666	0.00511199	0.00529056	0.00535639	0.00557915	0.00549428
447	0.0047804	0.00438762	0.00436652	0.00520308	0.00513162	0.00522175	0.0050795	0.00530031	0.00533681	0.00562674	0.00555034
448	0.00488626	0.00451429	0.00439766	0.00536292	0.00522252	0.00528615	0.00524459	0.00534286	0.00538068	0.00560223	0.00556237
449	0.00493841	0.00462025	0.00451411	0.00539714	0.00527273	0.00540494	0.00530418	0.00547084	0.00548069	0.00576369	0.0056249
450	0.00508342	0.00471981	0.00461446	0.00549801	0.00544608	0.00548746	0.00542539	0.00554177	0.00561608	0.00584032	0.00570414
451	0.00515765	0.00481466	0.00474382	0.00561538	0.00554912	0.00553805	0.00547832	0.00564991	0.00571075	0.00594126	0.00587903
452	0.00525032	0.00490604	0.00484625	0.00572508	0.00557627	0.00570948	0.00551485	0.00576677	0.00573233	0.00605689	0.00590604
453	0.00531532	0.00491806	0.00487986	0.00574639	0.0056421	0.00573058	0.00559656	0.0057951	0.00581386	0.00606013	0.00599454
454	0.00532537	0.00504973	0.00497369	0.00581784	0.00574478	0.00583084	0.00574483	0.00589214	0.00598187	0.00618	0.00606704
455	0.00544368	0.00515275	0.00503132	0.00594734	0.00582449	0.00597621	0.00580134	0.00599554	0.00605014	0.00631739	0.00610654
456	0.00547741	0.00513394	0.00506711	0.00591537	0.00583511	0.00592813	0.00582091	0.00602486	0.00603713	0.00640074	0.00622609
457	0.00546591	0.00515714	0.00504399	0.0059541	0.00586225	0.00591209	0.00581475	0.00600687	0.00604364	0.00633118	0.00624143
458	0.00552505	0.00517874	0.00509563	0.0059694	0.00589523	0.00595409	0.00588177	0.00607564	0.00609561	0.00637105	0.00625916
459	0.00562093	0.00530886	0.00520122	0.00611001	0.00601702	0.00606604	0.00600487	0.00611314	0.00614377	0.00647108	0.00639777
460	0.00569527	0.00537574	0.00532831	0.00614845	0.00606296	0.00616561	0.00607617	0.00622136	0.0062743	0.00654008	0.00639662
461	0.00577389	0.00544034	0.00540076	0.00627573	0.00615781	0.00622211	0.00615041	0.0063449	0.00626357	0.00660434	0.00649529
462	0.00584764	0.00547352	0.00548901	0.00635516	0.00621948	0.00628654	0.00616456	0.00641759	0.00640416	0.00668365	0.00659461
463	0.00597236	0.00560543	0.00552906	0.00642685	0.00634311	0.00635362	0.0062794	0.00649407	0.00645809	0.00678344	0.00668702
464	0.00598312	0.0056626	0.00562186	0.00651349	0.00641779	0.0064858	0.00631263	0.00652897	0.00655814	0.00683375	0.00674661
465	0.00609969	0.00576202	0.00569588	0.00664057	0.00646503	0.00653676	0.00642814	0.00659139	0.00661576	0.00693572	0.00681951
466	0.00610673	0.00583132	0.00578026	0.00663561	0.00654214	0.00659104	0.00647562	0.00669016	0.00672063	0.00699639	0.00690678
467	0.00614023	0.00584025	0.00583912	0.00672189	0.00659478	0.00668323	0.00654877	0.00671997	0.00682621	0.00707254	0.00697907
468	0.0061403	0.00576314	0.00575877	0.00673381	0.00657483	0.0066502	0.00654486	0.00674479	0.00680229	0.0070553	0.00699217
469	0.00618005	0.00587696	0.00585049	0.00667352	0.00661806	0.00670552	0.00655843	0.00673232	0.00676947	0.00706693	0.0069791
470	0.00628233	0.00593916	0.00597427	0.00676356	0.00664774	0.00674412	0.00666161	0.00682605	0.0068602	0.00718395	0.00703041
471	0.00628723	0.00595222	0.00596937	0.00683903	0.00669349	0.00687265	0.00672732	0.0069052	0.00691728	0.00723973	0.00717308
472	0.00636459	0.00611615	0.00601675	0.0068996	0.00683723	0.00682007	0.00678344	0.00687031	0.00695606	0.00727059	0.00712991
473	0.00648763	0.00614363	0.00612074	0.00700857	0.00691138	0.00691411	0.00682023	0.00698999	0.00706026	0.00731667	0.00729244
474	0.00654465	0.00622956	0.00617272	0.00707506	0.00694218	0.00703014	0.00686362	0.00705766	0.00711027	0.00737629	0.00727566
475	0.0065507	0.00625138	0.0062396	0.00711237	0.00699249	0.00708806	0.00693623	0.00712093	0.00718829	0.00745205	0.00739152
476	0.00661941	0.00643691	0.00638849	0.00719545	0.00706808	0.00718902	0.00708624	0.00721004	0.00723299	0.00753168	0.00748772
477	0.00665038	0.00639045	0.00635154	0.00722294	0.00712924	0.00723348	0.0070461	0.00724633	0.00729497	0.00761215	0.00751012
478	0.00677736	0.00646929	0.00642969	0.00734949	0.00718978	0.00720148	0.00712293	0.00732671	0.00730378	0.00769087	0.00766178
479	0.00678669	0.00654318	0.00648385	0.00735718	0.00725114	0.00737672	0.00723675	0.00734524	0.00741281	0.00775598	0.00765758
480	0.00681995	0.00657752	0.00661627	0.00747859	0.00735466	0.00737876	0.00723588	0.00738476	0.00747286	0.00780714	0.00773962
481	0.00692057	0.00667343	0.0065941	0.00750331	0.00739301	0.00747873	0.00734007	0.00751746	0.00752395	0.00784761	0.00772175
482	0.00690915	0.00670008	0.00662515	0.0075599	0.00743435	0.00750441	0.00740503	0.00751998	0.00754611	0.0079124	0.00779725
483	0.00679217	0.00657348	0.00654981	0.00751094	0.00744458	0.00749598	0.00737804	0.00748019	0.00753584	0.00791268	0.00782555
484	0.00692387	0.00664124	0.00663982	0.00750056	0.00737722	0.00744743	0.00733102	0.00738997	0.00751263	0.00793334	0.00775274
485	0.00697497	0.00671477	0.00665253	0.00754431	0.00746811	0.00751662	0.00732846	0.0075219	0.00758084	0.00786545	0.0078247
486	0.00694255	0.00679564	0.00680229	0.00761765	0.00749418	0.00756083	0.00743018	0.00753626	0.00755586	0.00797546	0.00784166
487	0.00702236	0.00679359	0.00674305	0.00761626	0.00750711	0.00762894	0.00745469	0.00755044	0.00761654	0.00796961	0.00793212
488	0.00710547	0.00687907	0.00682553	0.00769002	0.00755994	0.007664	0.00751306	0.00762586	0.00771348	0.0080597	0.00796554
489	0.00713042	0.00690885	0.00683076	0.00773062	0.00758924	0.00772035	0.00756193	0.00768743	0.00774635	0.00810035	0.00798638
490	0.00717206	0.00700674	0.00692858	0.00779137	0.00766177	0.00772316	0.00761904	0.00774477	0.0078092	0.00814445	0.00805712
491	0.00723359	0.00700956	0.00695454	0.00786246	0.00779077	0.00779716	0.00764676	0.00775615	0.00785607	0.00818821	0.00806024
492	0.0072768	0.00705269	0.00700562	0.00787737	0.00778916	0.00781753	0.00771614	0.0078241	0.00783754	0.00824423	0.00814231
493	0.00733274	0.00713494	0.00709462	0.00789665	0.00780029	0.00791246	0.00769691	0.00788784	0.00787572	0.00827026	0.00816869
494	0.00734207	0.00712571	0.00710357	0.00795357	0.00784277	0.00790391	0.00780895	0.00792135	0.00793401	0.00833751	0.00824204
495	0.00739527	0.00716697	0.00713072	0.00800092	0.00784771	0.00791971	0.00785565	0.00795509	0.00802095	0.0083591	0.008343
496	0.00740462	0.00720861	0.00719531	0.00805524	0.00791843	0.0080205	0.00783349	0.00800567	0.00804336	0.00835267	0.00832687
497	0.00743795	0.00720763	0.00716158	0.00804459	0.00788429	0.00798812	0.00790654	0.00799145	0.00805794	0.0084103	0.00830829
498	0.00743083	0.00729267	0.00721028	0.00813088	0.00789607	0.00806602	0.00789246	0.00799062	0.00812545	0.00846432	0.00837266
499	0.00757826	0.00741948	0.00737204	0.00825774	0.00809918	0.00817443	0.00805002	0.00814856	0.00824006	0.00860278	0.00855614
500	0.00752743	0.00730023	0.00730811	0.00820996	0.00798899	0.00802584	0.00794308	0.00803678	0.00810006	0.00854115	0.00843746
Pyridine Guest (Replicate 2)					Concentration of macrocycle = 10.4 µM in THF (200 ppm water (11.1 mM), 3.00 mL total volume); concentration of pyridine guest solution = 7.45 mM in THF (200 ppm water, 11.1 mM). A total of 205 µL of pyridine guest solution was added (49.0 equivalents w.r.t. macrocycle and 73 equivalents of water).
	before each spectrum added…
Guest aliquot added:	(+0 µM)	(+5 µM)	(+5 µM)	(+5 µM)	(+10 µM)	(+10 µM)	(+10 µM)	(+20 µM)	(+40 µM)	(+50 µM)	(+50 µM)																[Macro]	[Pyridine]	[Guest]/[Host]	A295
Wavelength (nm)	Abs (1)	Abs (2)	Abs (3)	Abs (4)	Abs (5)	Abs (6)	Abs (7)	Abs (8)	Abs (9)	Abs (10)	Abs (11)																1.04e-05	0	0	0.534327
250	0.537274	0.534138	0.546909	0.566767	0.611074	0.657393	0.701338	0.797476	0.994339	1.22591	1.45551																1.03827e-05	1.2396e-05	1.19391	0.537895
251	0.535594	0.534474	0.548718	0.569701	0.615371	0.663318	0.708684	0.807366	1.00936	1.24792	1.48333																1.03654e-05	2.47508e-05	2.38782	0.542712
252	0.53698	0.537335	0.552518	0.573729	0.61998	0.668206	0.714257	0.813273	1.01579	1.2548	1.4915																1.03483e-05	3.70647e-05	3.58173	0.546802
253	0.54114	0.542721	0.558224	0.579758	0.625306	0.673315	0.718947	0.816531	1.016	1.25199	1.48474																1.0314e-05	6.15702e-05	5.96955	0.547925
254	0.547803	0.550516	0.566437	0.587915	0.632897	0.680363	0.725585	0.821605	1.01765	1.24959	1.4785																1.02801e-05	8.59143e-05	8.35737	0.551982
255	0.55646	0.560303	0.576867	0.598822	0.643898	0.691184	0.736695	0.831897	1.02709	1.25769	1.4852																1.02463e-05	0.000110099	10.7452	0.555195
256	0.566851	0.572321	0.589562	0.611975	0.657154	0.704893	0.751114	0.846172	1.04117	1.27245	1.49985																1.01794e-05	0.000157993	15.5208	0.554976
257	0.578476	0.585097	0.602859	0.625371	0.670054	0.717609	0.763518	0.857414	1.04978	1.27767	1.50193																1.00483e-05	0.000251932	25.0721	0.555077
258	0.590488	0.597603	0.615205	0.637278	0.680567	0.726432	0.770952	0.860923	1.04567	1.26408	1.47886																9.88906e-06	0.000366006	37.0112	0.552142
259	0.603437	0.610214	0.627136	0.648244	0.688894	0.732507	0.774428	0.859051	1.03219	1.23649	1.43685																9.73479e-06	0.000476521	48.9503	0.548016
260	0.615397	0.622237	0.63851	0.658559	0.696643	0.737647	0.777115	0.855808	1.01751	1.20803	1.39517
261	0.626564	0.633722	0.649596	0.668877	0.704901	0.743913	0.781625	0.856135	1.00854	1.18888	1.3656
262	0.63697	0.644365	0.660156	0.679022	0.713893	0.751788	0.788421	0.859874	1.00637	1.17942	1.34878
263	0.645641	0.653507	0.669088	0.687919	0.72149	0.758259	0.793866	0.862548	1.00359	1.1696	1.33235
264	0.652669	0.660561	0.67598	0.693984	0.725799	0.760882	0.794535	0.859273	0.992194	1.14816	1.30085
265	0.65762	0.665248	0.679712	0.69651	0.725885	0.758293	0.789341	0.848644	0.969657	1.11157	1.24993
266	0.660451	0.667271	0.68081	0.696215	0.722477	0.75201	0.780127	0.832841	0.940908	1.06666	1.18969
267	0.660648	0.666764	0.679091	0.69333	0.716516	0.742851	0.767823	0.814242	0.909018	1.01881	1.12582
268	0.658246	0.66357	0.674876	0.68763	0.708108	0.731585	0.754027	0.794434	0.877005	0.9724	1.06519
269	0.653081	0.658036	0.668302	0.680189	0.697948	0.719061	0.738974	0.774322	0.846343	0.929286	1.00966
270	0.645772	0.650489	0.659891	0.670551	0.686388	0.705041	0.722726	0.753451	0.816424	0.888031	0.957695
271	0.636819	0.641135	0.64999	0.659709	0.673592	0.690661	0.706465	0.733222	0.787804	0.849974	0.910234
272	0.626682	0.630439	0.638837	0.647821	0.660145	0.675466	0.689538	0.712895	0.760659	0.814517	0.866631
273	0.61586	0.619506	0.627129	0.63551	0.646402	0.660255	0.672896	0.693399	0.734852	0.781608	0.826355
274	0.604561	0.607974	0.615302	0.623086	0.632612	0.645282	0.656646	0.67473	0.710846	0.750827	0.789804
275	0.593115	0.596278	0.603354	0.610642	0.619164	0.630529	0.640869	0.65635	0.687857	0.722302	0.755601
276	0.582178	0.585334	0.592049	0.598804	0.606378	0.616863	0.626034	0.63965	0.667089	0.696509	0.724463
277	0.572848	0.575901	0.582104	0.588487	0.595267	0.604797	0.613143	0.624929	0.648682	0.673803	0.697641
278	0.564348	0.567197	0.57333	0.579383	0.585086	0.593977	0.601543	0.611572	0.631801	0.652984	0.672981
279	0.557125	0.559883	0.56572	0.571412	0.576634	0.584572	0.591767	0.600267	0.617469	0.635072	0.651587
280	0.551279	0.554232	0.559861	0.565262	0.569898	0.577305	0.583599	0.590911	0.605393	0.619961	0.633108
281	0.546929	0.549824	0.555235	0.560327	0.56441	0.571381	0.577151	0.583223	0.595681	0.607173	0.617841
282	0.543692	0.546522	0.551974	0.556885	0.560558	0.566862	0.572294	0.577346	0.587622	0.596806	0.604965
283	0.541434	0.544258	0.54956	0.554296	0.557475	0.563628	0.568543	0.57275	0.581176	0.588141	0.594289
284	0.539773	0.542791	0.547868	0.552522	0.555315	0.56094	0.565655	0.569074	0.575997	0.581263	0.585445
285	0.538624	0.541663	0.546606	0.551097	0.553727	0.559186	0.56347	0.566375	0.571821	0.57567	0.578428
286	0.537962	0.54106	0.545985	0.550351	0.552732	0.557813	0.561906	0.56409	0.568786	0.57091	0.572258
287	0.537274	0.540468	0.545459	0.549753	0.551835	0.556696	0.560662	0.562421	0.565703	0.5669	0.567054
288	0.537075	0.54001	0.544983	0.549269	0.551226	0.5558	0.559735	0.560949	0.56345	0.563616	0.56288
289	0.536921	0.540265	0.545116	0.549199	0.551085	0.555492	0.559089	0.559972	0.561868	0.561204	0.559414
290	0.537312	0.540509	0.545565	0.54953	0.551186	0.555451	0.559014	0.559532	0.560744	0.559353	0.55707
291	0.537752	0.54098	0.54592	0.549873	0.551381	0.555732	0.559243	0.559412	0.560198	0.55821	0.555318
292	0.538079	0.541376	0.546301	0.550281	0.551582	0.555895	0.559094	0.559357	0.559862	0.557435	0.554184
293	0.537799	0.541115	0.545984	0.550103	0.551276	0.555586	0.558891	0.558764	0.558776	0.556336	0.552672
294	0.536336	0.539979	0.545036	0.548845	0.550092	0.554199	0.557548	0.557466	0.557409	0.554535	0.550742
295	0.534327	0.537895	0.542712	0.546802	0.547925	0.551982	0.555195	0.554976	0.555077	0.552142	0.548016
296	0.531676	0.535114	0.539937	0.543951	0.545231	0.549335	0.552323	0.552269	0.551814	0.549076	0.545119
297	0.528048	0.53143	0.536306	0.540406	0.541445	0.545508	0.548543	0.548433	0.548044	0.545054	0.541054
298	0.523648	0.527299	0.532069	0.535864	0.536999	0.540864	0.544134	0.543843	0.543559	0.540453	0.536341
299	0.518658	0.52239	0.527193	0.530957	0.532099	0.536081	0.53911	0.538893	0.538415	0.535403	0.531552
300	0.513792	0.517265	0.521947	0.525817	0.526764	0.53064	0.53389	0.533395	0.533185	0.530054	0.526161
301	0.508258	0.511796	0.516536	0.520378	0.521318	0.525151	0.528247	0.527934	0.527715	0.524729	0.520516
302	0.502611	0.506439	0.511205	0.514724	0.515986	0.519366	0.522419	0.522234	0.521827	0.519074	0.515005
303	0.496672	0.50032	0.505045	0.508774	0.509629	0.513393	0.516347	0.516062	0.51568	0.512632	0.508885
304	0.490364	0.493857	0.498563	0.502182	0.50313	0.506783	0.509764	0.509346	0.509084	0.506245	0.502312
305	0.483529	0.487222	0.491652	0.494901	0.496056	0.499605	0.502695	0.502332	0.501952	0.49895	0.495359
306	0.476037	0.479469	0.483844	0.487568	0.488541	0.491985	0.494765	0.494366	0.494182	0.491305	0.487717
307	0.468263	0.471925	0.476073	0.479424	0.480639	0.484011	0.48686	0.486396	0.486102	0.483321	0.479648
308	0.459817	0.463007	0.467422	0.470715	0.471618	0.475099	0.477821	0.477398	0.477162	0.474344	0.470918
309	0.450162	0.453529	0.457814	0.460855	0.461907	0.465141	0.467897	0.467568	0.467243	0.464513	0.461195
310	0.440078	0.443365	0.447425	0.450559	0.451479	0.45481	0.457467	0.456929	0.456727	0.454057	0.450598
311	0.429411	0.432274	0.436598	0.4396	0.440442	0.443634	0.446187	0.445863	0.44548	0.44301	0.439651
312	0.418417	0.421571	0.425482	0.428418	0.429073	0.432405	0.434797	0.434452	0.433976	0.431537	0.428273
313	0.406252	0.40928	0.413034	0.415958	0.416623	0.419835	0.422193	0.421718	0.421453	0.419162	0.41576
314	0.393551	0.39646	0.400307	0.403017	0.403763	0.406633	0.409139	0.408606	0.408438	0.406083	0.40305
315	0.380944	0.383743	0.387259	0.389987	0.390673	0.393552	0.395786	0.39547	0.395077	0.392733	0.389891
316	0.367606	0.370354	0.374035	0.376525	0.377098	0.379932	0.382007	0.381761	0.381321	0.379072	0.376319
317	0.354125	0.356717	0.360297	0.362733	0.363346	0.365983	0.368142	0.36769	0.367526	0.365275	0.362345
318	0.340639	0.342885	0.346305	0.348669	0.349164	0.35188	0.353734	0.353276	0.352941	0.351102	0.348511
319	0.326461	0.328765	0.331992	0.334293	0.334893	0.337356	0.33933	0.338732	0.338508	0.336424	0.333876
320	0.312676	0.314793	0.318	0.320199	0.320733	0.323011	0.32481	0.32434	0.324138	0.322133	0.319866
321	0.298712	0.300858	0.303868	0.305732	0.306281	0.308589	0.310282	0.30984	0.30963	0.307676	0.305448
322	0.284429	0.286365	0.289395	0.291326	0.291625	0.293827	0.295226	0.294907	0.294749	0.293041	0.290614
323	0.270589	0.272431	0.275182	0.277055	0.277488	0.279523	0.281004	0.280621	0.280421	0.278751	0.276473
324	0.255983	0.25783	0.260499	0.262074	0.262385	0.264391	0.265887	0.26565	0.265175	0.263728	0.261502
325	0.243	0.244694	0.247362	0.248928	0.249235	0.250901	0.252396	0.251944	0.251652	0.250143	0.248192
326	0.229409	0.230909	0.233345	0.234924	0.235126	0.236929	0.238033	0.237864	0.237529	0.236067	0.234434
327	0.215935	0.217446	0.219865	0.221268	0.221421	0.22316	0.224288	0.223852	0.223504	0.222084	0.220524
328	0.202743	0.204202	0.206421	0.207678	0.207956	0.209386	0.210374	0.210086	0.209876	0.208455	0.206924
329	0.189924	0.191156	0.193296	0.194483	0.194712	0.19613	0.197143	0.196845	0.196413	0.1953	0.193707
330	0.177533	0.178364	0.180528	0.181775	0.181694	0.183157	0.184167	0.183647	0.183346	0.182229	0.180684
331	0.165252	0.166374	0.16828	0.169162	0.169468	0.170602	0.171429	0.171108	0.170716	0.16972	0.168447
332	0.153376	0.154187	0.156284	0.157082	0.157248	0.158413	0.159202	0.158831	0.158502	0.157604	0.15638
333	0.142286	0.142934	0.1448	0.145613	0.145519	0.146778	0.147407	0.147125	0.146567	0.145757	0.144661
334	0.131427	0.132204	0.133872	0.134519	0.134507	0.135563	0.136285	0.135973	0.135466	0.134711	0.133598
335	0.121027	0.121781	0.123416	0.123958	0.123955	0.124939	0.125433	0.125199	0.124808	0.123919	0.123085
336	0.111306	0.111697	0.113562	0.114147	0.114038	0.114995	0.115566	0.115061	0.114694	0.113856	0.113127
337	0.102249	0.10294	0.104123	0.104831	0.104871	0.10558	0.106041	0.105868	0.105274	0.104645	0.103751
338	0.0937232	0.0942954	0.0957001	0.0961867	0.0960993	0.0967779	0.0971346	0.0969038	0.0963781	0.0958842	0.0951511
339	0.0860211	0.0861488	0.0877386	0.0881186	0.0879415	0.0886539	0.0890065	0.0887027	0.0881508	0.0876155	0.0870052
340	0.0812948	0.0816065	0.082934	0.0831921	0.0830724	0.0836834	0.0839402	0.0838294	0.0832774	0.0827484	0.08213
341	0.0745458	0.0748671	0.0760607	0.0765004	0.0762324	0.0769449	0.0772319	0.0768418	0.0764153	0.075837	0.0752653
342	0.0685714	0.0688667	0.0700075	0.0702834	0.0701124	0.0706358	0.070973	0.0706187	0.0701122	0.0695997	0.0690066
343	0.0629366	0.0628961	0.0642667	0.0643911	0.06434	0.0647514	0.0649041	0.0646604	0.0643329	0.0640287	0.0631734
344	0.0578483	0.0579825	0.0591563	0.0592546	0.0591124	0.0598045	0.059695	0.059369	0.0588891	0.0586531	0.0579201
345	0.0533517	0.0534288	0.0546163	0.0546288	0.0545899	0.0550809	0.0551595	0.0547648	0.0541054	0.0539846	0.0536027
346	0.0494496	0.0495907	0.0506972	0.0507162	0.0502462	0.0508646	0.0510612	0.0507276	0.0502418	0.0500527	0.0494007
347	0.0456854	0.0456985	0.0465504	0.0468426	0.04665	0.0470523	0.0471508	0.0467807	0.0462709	0.0458437	0.0455687
348	0.042346	0.0423273	0.0434551	0.043333	0.0433059	0.0437277	0.0435929	0.0434555	0.0429294	0.0426327	0.0422188
349	0.0392243	0.039411	0.0401487	0.0405218	0.0401289	0.0404563	0.0405187	0.0401826	0.0398914	0.0394942	0.0391579
350	0.036615	0.0365938	0.0376154	0.0375501	0.037501	0.03766	0.0375387	0.0373285	0.0370757	0.0366185	0.0364888
351	0.0342177	0.0343043	0.0351865	0.0351166	0.0348391	0.0353747	0.0352967	0.0349294	0.0344566	0.0341642	0.0339985
352	0.032107	0.0321229	0.0329205	0.0331507	0.0327655	0.0330689	0.03305	0.0326869	0.0322072	0.0320351	0.0316914
353	0.0302203	0.0300713	0.0307691	0.0310093	0.0307885	0.030991	0.0308487	0.0306457	0.0302409	0.030177	0.0298052
354	0.0282852	0.0283736	0.0291639	0.029125	0.0289758	0.0293288	0.0292314	0.0289567	0.0283103	0.0280483	0.0280409
355	0.0266019	0.0265353	0.0275977	0.0273144	0.0270415	0.0274957	0.0272304	0.027035	0.0266045	0.0262497	0.0261375
356	0.0249169	0.0249264	0.0258968	0.0256495	0.0253791	0.0256184	0.0256388	0.0251856	0.0249146	0.0247632	0.0243905
357	0.0234183	0.0233767	0.0244323	0.0241588	0.0241217	0.0242287	0.0241596	0.0240027	0.0234666	0.0232666	0.0230009
358	0.0222442	0.0223057	0.0230964	0.0229723	0.0226512	0.0230435	0.0228491	0.0224908	0.0219628	0.0220668	0.0218397
359	0.0209522	0.0209718	0.0217585	0.0216715	0.0213695	0.0216087	0.0214587	0.0211419	0.0206925	0.0203762	0.0204236
360	0.0196272	0.0196665	0.0204774	0.0203677	0.0200113	0.0203925	0.0202137	0.0201201	0.0195433	0.0191783	0.0194172
361	0.0185592	0.0183837	0.0193499	0.0192277	0.0190551	0.0192396	0.0190834	0.0188534	0.0182613	0.0181229	0.0180744
362	0.0174266	0.0174718	0.0181651	0.0182118	0.0177872	0.017902	0.0177646	0.0175527	0.0169283	0.0170677	0.016741
363	0.0165632	0.0162063	0.0171315	0.0170644	0.0168498	0.0169279	0.0166134	0.0165597	0.0159115	0.015954	0.0158311
364	0.0156033	0.0154878	0.0162844	0.0159981	0.0160565	0.0159858	0.0158508	0.0154686	0.0151003	0.0150345	0.0150105
365	0.0146221	0.0146456	0.0153442	0.0152734	0.0150484	0.0150361	0.0148331	0.0149968	0.0144156	0.0142325	0.0141302
366	0.0137931	0.0136512	0.0142973	0.0143221	0.0139975	0.014253	0.0140876	0.0136903	0.0133458	0.0132007	0.0131643
367	0.0130079	0.012771	0.0136234	0.0135426	0.0132442	0.0135582	0.0131996	0.0130789	0.0124014	0.0122813	0.012239
368	0.0124256	0.0117754	0.0127151	0.0126194	0.0124798	0.0124938	0.0124373	0.0120217	0.0116003	0.0115638	0.0114258
369	0.0115713	0.0112149	0.0121277	0.0119701	0.0115497	0.0117644	0.0115707	0.0112733	0.0108842	0.0108896	0.0107196
370	0.0106935	0.0105012	0.0110295	0.0110674	0.0109162	0.0109129	0.0107081	0.0107697	0.0100617	0.0101657	0.0101461
371	0.0102055	0.00996818	0.0109616	0.0105956	0.0102495	0.0105934	0.0102433	0.0101763	0.00947227	0.00941897	0.00924789
372	0.00968999	0.00924543	0.01005	0.00997725	0.00966745	0.0096855	0.00972174	0.00926321	0.0089728	0.00877826	0.00861638
373	0.00872127	0.00847198	0.00928738	0.00902991	0.00900585	0.00903879	0.0089489	0.00849922	0.00813664	0.00804332	0.00787507
374	0.00802831	0.00784931	0.0086847	0.00826989	0.00819798	0.00813841	0.00806717	0.00766838	0.00714244	0.00713317	0.00720761
375	0.00725865	0.00694245	0.00779006	0.00773256	0.0072268	0.00738403	0.0071154	0.00706623	0.0064221	0.00646273	0.00635134
376	0.00640451	0.00621123	0.00705603	0.00710676	0.00660895	0.00656294	0.0064981	0.00647026	0.0057401	0.00584077	0.00578175
377	0.00594416	0.00544078	0.00660941	0.00624554	0.00604949	0.00608537	0.00584722	0.00553159	0.00514594	0.0049989	0.00505914
378	0.00529646	0.00506971	0.00572363	0.00538888	0.00528811	0.00531866	0.00514952	0.00477644	0.00432938	0.00434721	0.00436044
379	0.00470973	0.00441208	0.00507994	0.00496921	0.00477168	0.00460552	0.0046577	0.00442752	0.00374873	0.00394377	0.00386574
380	0.00421144	0.00389702	0.00471202	0.00463501	0.00430581	0.00451242	0.00400904	0.00391298	0.00316928	0.00348745	0.0036572
381	0.00378601	0.00365661	0.00435175	0.00428423	0.00386896	0.00405307	0.00385932	0.00331288	0.00311205	0.00308699	0.00293114
382	0.00336318	0.00311395	0.00394717	0.00344106	0.00338542	0.00338733	0.00317468	0.00287048	0.00240651	0.00245533	0.00249772
383	0.00291847	0.00278107	0.00367346	0.00309428	0.00292878	0.00292213	0.00263336	0.00257758	0.00189883	0.00196353	0.00205909
384	0.00278171	0.00243448	0.00328855	0.00307484	0.00266426	0.00259046	0.00241204	0.00217939	0.00172138	0.00187544	0.00186107
385	0.00225642	0.00220845	0.00260852	0.00258524	0.00228397	0.00231113	0.00219578	0.00204548	0.00154696	0.00145746	0.00132188
386	0.00207653	0.00166463	0.00258594	0.00198808	0.00207434	0.00184481	0.00176284	0.00150618	0.000906733	0.00126661	0.000970012
387	0.00147828	0.00134574	0.00192767	0.00178559	0.00153035	0.00154728	0.00133786	0.00124939	0.0006963	0.000782714	0.000771832
388	0.00102561	0.000882657	0.00160178	0.00151488	0.00118005	0.00105007	0.000725857	0.000674899	0.000120742	0.000123167	0.000281146
389	0.000742959	0.000416037	0.00129578	0.000872322	0.000624322	0.000781005	0.000606641	0.000472845	-0.000125088	-1.77734e-05	-0.000262912
390	0.000356716	0.000148195	0.000850561	0.000564371	0.000335116	0.000424191	0.00018468	-0.000133241	-0.000548134	-0.000394669	-0.000317576
391	0.000175666	-3.54325e-06	0.000490561	6.90236e-05	3.77834e-05	0.000385828	-0.000105241	-0.000385617	-0.00100633	-0.00103783	-0.0011267
392	-9.29411e-05	-0.000387975	0.000355249	-5.04575e-05	-0.000170865	-0.000344746	-0.000355408	-0.000834341	-0.00147761	-0.0012883	-0.00156948
393	-0.000454778	-0.000774488	3.34023e-05	-0.000277475	-0.000599696	-0.000624837	-0.000849487	-0.00121073	-0.00260609	-0.00166531	-0.00240246
394	-0.000850116	-0.00120711	-0.000329532	-0.000439991	-0.00100472	-0.000793178	-0.00109821	-0.00187642	-0.00306095	-0.00232728	-0.00277876
395	-0.000750156	-0.00124688	-0.000491249	-0.000670878	-0.00120083	-0.00102468	-0.00128446	-0.00261302	-0.00293125	-0.00292749	-0.00308016
396	-0.000838664	-0.00131796	-0.00039884	-0.00102864	-0.000979377	-0.00111917	-0.00128837	-0.00272467	-0.00304532	-0.002962	-0.00294919
397	-0.00121119	-0.00182655	-0.00075752	-0.00131277	-0.00111511	-0.00140895	-0.00162861	-0.00268955	-0.00333139	-0.00306064	-0.00319171
398	-0.00158359	-0.00234369	-0.00123495	-0.00130621	-0.00180296	-0.00176831	-0.00175005	-0.00302431	-0.00378056	-0.00334824	-0.00363589
399	-0.00153224	-0.00236737	-0.00115563	-0.00138866	-0.00182616	-0.00184761	-0.00190334	-0.00322988	-0.00370395	-0.00357301	-0.00345996
400	-0.00135776	-0.00239999	-0.000905696	-0.00149262	-0.00152596	-0.00152659	-0.00171709	-0.00307357	-0.00356491	-0.00348138	-0.00344661
401	-0.00135466	-0.00270567	-0.000772622	-0.00109269	-0.00132087	-0.00130705	-0.00163144	-0.00336802	-0.0032733	-0.0032197	-0.00304706
402	-0.00142716	-0.00278181	-0.00105026	-0.00135194	-0.00128875	-0.0013664	-0.00145954	-0.0031629	-0.00350739	-0.00330232	-0.00319669
403	-0.00140798	-0.00270817	-0.000736929	-0.00132088	-0.00152206	-0.00152999	-0.00183806	-0.00310494	-0.00342969	-0.00320321	-0.00338183
404	-0.001469	-0.00278864	-0.00102395	-0.00101722	-0.00145716	-0.00163777	-0.00194596	-0.003229	-0.00346314	-0.00345607	-0.00355538
405	-0.00133942	-0.00184647	-0.0009603	-0.00123514	-0.00149222	-0.001634	-0.00179264	-0.00226258	-0.00355499	-0.0033298	-0.00315789
406	-0.00125026	-0.00175664	-0.00102942	-0.00145837	-0.00131858	-0.0014415	-0.00169405	-0.00216264	-0.00351278	-0.00361236	-0.00323006
407	-0.00117949	-0.00110135	-0.000605517	-0.00110943	-0.00132904	-0.000960473	-0.00126051	-0.00214068	-0.0031658	-0.0030636	-0.00306206
408	-0.00126505	-0.00136141	-0.000591716	-0.000713259	-0.00113366	-0.00137523	-0.00115271	-0.00238411	-0.00318516	-0.00297006	-0.00311097
409	-0.000882029	-0.00153157	-0.000484844	-0.000766368	-0.000914578	-0.00104707	-0.00137358	-0.00227023	-0.00290815	-0.00286859	-0.0029852
410	-0.000931818	-0.00135183	-0.000504743	-0.000868022	-0.00086212	-0.000889401	-0.00134927	-0.00181625	-0.00302892	-0.00296949	-0.0030217
411	-0.000871314	-0.000952281	-0.000554791	-0.000835759	-0.000693605	-0.000937288	-0.00129058	-0.00176614	-0.00321205	-0.00289799	-0.00258977
412	-0.00102141	-0.00128718	-0.000385283	-0.000827506	-0.00113827	-0.00129767	-0.00119748	-0.00225867	-0.00312728	-0.00278884	-0.00281455
413	-0.0011655	-0.00137111	-0.000596828	-0.000528963	-0.00117405	-0.00100228	-0.00152191	-0.00202434	-0.00296865	-0.00280433	-0.00306677
414	-0.000717662	-0.00122574	-0.000674794	-0.000888172	-0.000963125	-0.00106354	-0.00117819	-0.00203009	-0.0027704	-0.00307983	-0.00305669
415	-0.000764392	-0.00102867	-0.000393978	-0.000703776	-0.00103809	-0.000779388	-0.00097307	-0.00236875	-0.00292362	-0.00294927	-0.00257845
416	-0.00109415	-0.00139356	-0.000472214	-0.000849486	-0.00122231	-0.00107133	-0.00136511	-0.00219098	-0.00292264	-0.00272943	-0.00276959
417	-0.00101646	-0.00107259	-0.000444054	-0.000632734	-0.000979327	-0.00123001	-0.0011216	-0.00240404	-0.00287392	-0.00254481	-0.00267519
418	-0.00107183	-0.00138709	-0.000612961	-0.000757344	-0.00109988	-0.00114567	-0.00120977	-0.00245401	-0.00303459	-0.0028754	-0.00295922
419	-0.000817201	-0.00115259	-0.000472535	-0.000546786	-0.000679088	-0.0010013	-0.00124073	-0.0024566	-0.00277905	-0.00251556	-0.0027921
420	-0.000772103	-0.00120095	-0.000357091	-0.000669527	-0.000958127	-0.000882973	-0.00128818	-0.00249072	-0.00278117	-0.00295027	-0.00251736
421	-0.000953929	-0.000978737	-0.000260431	-0.000981784	-0.000812498	-0.00124042	-0.000995276	-0.0020848	-0.00280325	-0.00223784	-0.00303741
422	-0.000945115	-0.00125446	-0.000234361	-0.000496753	-0.00103071	-0.00104565	-0.00120464	-0.00223999	-0.00317709	-0.00248396	-0.00268675
423	-0.000636559	-0.00111854	-0.000362239	-0.000428718	-0.000926219	-0.000766757	-0.00120664	-0.00161477	-0.00247381	-0.00242973	-0.00175243
424	-7.99296e-05	-0.000682959	0.000175652	3.45901e-05	-0.00026051	-0.00027334	-0.000567736	-0.00100485	-0.00211957	-0.00140225	-0.00108763
425	-0.000363602	-0.000644046	0.000338296	-0.000261764	-2.67588e-05	-0.000412357	-0.000608917	-0.000939966	-0.00237124	-0.00156086	-0.00103835
426	-0.000644397	-0.000512143	0.000297063	-0.000350361	-0.000476714	-0.000560927	-0.000554393	-0.000658718	-0.00253659	-0.00098715	-0.000879137
427	-0.000487507	-0.000603414	4.1188e-05	0.000131971	-0.00052976	-0.000420465	-0.000606559	-0.000672894	-0.00246438	-0.000902974	-0.00124889
428	-0.000181463	-0.000882486	7.43449e-05	-0.000154005	-0.000591461	-0.000272975	-0.000569159	-0.000842457	-0.00203181	-0.0017181	-0.00154139
429	-0.000274715	-0.000494837	0.000396976	-0.000116666	-0.000351103	-2.97712e-05	-0.000194633	-0.000978421	-0.00196964	-0.00161033	-0.00124396
430	-0.000569245	-0.000333007	0.000387334	-0.000241478	-0.000614008	-0.000263418	-0.000324776	-0.00123526	-0.00215043	-0.00170873	-0.00106181
431	-0.00089387	-0.000538729	0.000506845	9.15245e-05	-0.000929406	-0.00050437	-0.000243287	-0.000937673	-0.00196098	-0.00155076	-0.00144947
432	-0.00109965	-0.000113339	0.000834859	0.000674289	-0.00109226	4.31461e-05	-0.000193859	-0.00129433	-0.00179474	-0.00149172	-0.00177583
433	-0.000667232	-0.000239592	0.000635554	0.00075749	-0.000686722	0.000243258	-0.000281999	-0.00124692	-0.00148513	-0.00152669	-0.00152529
434	-0.000584458	-0.00051672	3.07245e-05	-0.000126136	-0.000778274	-0.000103275	-0.000575847	-0.00156242	-0.00170208	-0.00217861	-0.00175892
435	0.00321589	0.00279229	0.0037708	0.00342105	0.00331758	0.00320565	0.00280705	0.00276975	0.00214602	0.00236247	0.00227453
436	0.00322451	0.00274524	0.00376524	0.0033418	0.00324566	0.00315861	0.00281127	0.00272723	0.00208747	0.00228424	0.00222603
437	0.00320258	0.00284876	0.00381311	0.00348642	0.00337539	0.00324508	0.00284876	0.00284628	0.00216532	0.00238264	0.00232996
438	0.00328193	0.00291284	0.00390952	0.00355719	0.00343399	0.00331386	0.0029353	0.00290447	0.00230486	0.0024299	0.00244109
439	0.00338084	0.00302764	0.00391572	0.00356538	0.00350232	0.00335354	0.00302438	0.00291994	0.00232487	0.00250388	0.00242643
440	0.00337703	0.00301461	0.00399519	0.00365399	0.00345964	0.00335943	0.00302397	0.00304394	0.00235546	0.00258451	0.00252008
441	0.00345482	0.00308926	0.00404175	0.00363892	0.00355554	0.00340625	0.00307576	0.0030285	0.00236304	0.00261231	0.0024961
442	0.00339624	0.00303239	0.00404801	0.00361948	0.00355445	0.0034015	0.00306942	0.00303848	0.00236408	0.00255912	0.0025308
443	0.00351376	0.0031751	0.00409019	0.00375129	0.00359463	0.0035223	0.00318036	0.00315258	0.00243969	0.00267397	0.0026711
444	0.00358421	0.00322242	0.00413385	0.00379232	0.00361187	0.00363573	0.00326609	0.00315809	0.00252547	0.00271313	0.00270641
445	0.00369128	0.00331924	0.00427993	0.00396678	0.00382488	0.00370864	0.00335253	0.00321942	0.00260722	0.00287445	0.00279962
446	0.00378784	0.00348019	0.00437851	0.00403946	0.00386416	0.00374495	0.00336562	0.00340159	0.00271613	0.00291583	0.00291081
447	0.00382538	0.00340363	0.00439321	0.00410194	0.00393598	0.0038528	0.00344976	0.00350501	0.0027729	0.00299182	0.00298344
448	0.00390805	0.00343237	0.00446594	0.00411249	0.00396028	0.00392093	0.00350186	0.00355863	0.00277922	0.00300838	0.00302475
449	0.00388259	0.0035383	0.00449634	0.00404639	0.00403311	0.00386883	0.0035564	0.00351523	0.00283408	0.00302986	0.00304224
450	0.00389122	0.00361267	0.00451346	0.00414334	0.00404846	0.00392299	0.00359418	0.00355809	0.00285914	0.00306577	0.00305515
451	0.00398436	0.00358951	0.00451599	0.00428685	0.00409739	0.00400833	0.00366565	0.00361028	0.00291647	0.00315713	0.00312765
452	0.00409253	0.00367942	0.00468612	0.00426675	0.00421736	0.00409155	0.00367454	0.00368976	0.00299502	0.00323519	0.00321668
453	0.00413313	0.00378835	0.00468914	0.00436941	0.0042712	0.00414421	0.00380436	0.00377898	0.00310449	0.00329369	0.00331723
454	0.00425199	0.00389119	0.00484508	0.00452238	0.00433566	0.00423768	0.00389939	0.00383956	0.00321034	0.00339118	0.00338714
455	0.00427966	0.00390751	0.00485212	0.00456191	0.00442179	0.00434473	0.00393206	0.00389707	0.00326833	0.00349162	0.00345149
456	0.00441155	0.00400407	0.00500714	0.00462106	0.00448587	0.00446711	0.00402701	0.00400173	0.00333093	0.00364615	0.0035947
457	0.00448899	0.00402885	0.00498594	0.00470294	0.00459945	0.0044606	0.00408631	0.00404916	0.00344881	0.00359497	0.00357098
458	0.00446122	0.00404328	0.00508159	0.00474625	0.00459691	0.00452168	0.0041049	0.00410827	0.00340974	0.00362766	0.00361059
459	0.00452235	0.00423965	0.00512117	0.00475829	0.00467741	0.00452987	0.0042121	0.00420346	0.00350367	0.00375317	0.00372849
[truncated: 1,786 more rows]
[truncated: 1 more columns]

## Sheet: CHCl3 Fit1
FIT AT 295 nm				CHCl3	Replicate 1
Known species Present	Molar absorbtivity
H	51002.1	M-1	A is at 295 nm	0.530421	at concentration of	1.04e-05	M	epsilon	51002.1
G	0	M-1
Fit to absorbance at 295 nm		Using: -(b2+4ac)0.5 term
Optimised variables:	Equilibrium const. K		2.96166	M-1				a = K
	molar absorbtivity of H.G, eHG		58288.3	M-1 cm-1			x = [H.G]	b = (- K[HTOT] - K[GTOT] -1)
								c = K[HTOT][GTOT]
			Baseline corrected
	[GTOT] (M)	[HTOT] (M)	A295 Obs	A295 Calc	(Obs-Calc)2	Calc [G]	Calc [H]	Calc [H.G]	a	b	c
	0	1.04e-05	0.530421	0.530421	0	0	1.04e-05	0	2.96166	-1.00003	0
	0.0207692	1.03827e-05	0.533735	0.533922	3.51608e-08	0.0207686	9.78107e-06	6.0163e-07	2.96166	-1.06154	6.38654e-07
	0.0414694	1.03654e-05	0.538216	0.53692	1.67832e-06	0.0414683	9.23166e-06	1.13379e-06	2.96166	-1.12285	1.27307e-06
	0.062101	1.03483e-05	0.540095	0.539496	3.59317e-07	0.0620994	8.74069e-06	1.60757e-06	2.96166	-1.18395	1.90327e-06
	0.10316	1.0314e-05	0.542056	0.543625	2.45917e-06	0.103157	7.90036e-06	2.41369e-06	2.96166	-1.30555	3.15119e-06
	0.143947	1.02801e-05	0.545673	0.546693	1.0404e-06	0.143944	7.20743e-06	3.07263e-06	2.96166	-1.42635	4.38264e-06
	0.184468	1.02463e-05	0.550566	0.548959	2.58222e-06	0.184464	6.62625e-06	3.62005e-06	2.96166	-1.54636	5.59787e-06
	0.264714	1.01794e-05	0.551495	0.551767	7.40901e-08	0.26471	5.70603e-06	4.47342e-06	2.96166	-1.78402	7.98063e-06
		Values	2.96166	58288.3	8.22868e-06
		Stand Dev.	0.697818	1135.34
		Quality of fit	0.979729	0.00117109

## Sheet: CHCl3 Fit2
FIT AT 295 nm				CHCl3	Replicate 2
Known species Present	Molar absorbtivity
H	51098.5	M-1	A is at 295 nm	0.551864	at concentration of	1.08e-05	M	epsilon	51098.5
G	0	M-1
Fit to absorbance at 295 nm		Using: -(b2+4ac)0.5 term
Optimised variables:	Equilibrium const. K		4.21956	M-1				a = K
	molar absorbtivity of H.G, eHG		59229.3	M-1 cm-1			x = [H.G]	b = (- K[HTOT] - K[GTOT] -1)
								c = K[HTOT][GTOT]
			Baseline corrected
	[GTOT] (M)	[HTOT] (M)	A295 Obs	A295 Calc	(Obs-Calc)2	Calc [G]	Calc [H]	Calc [H.G]	a	b	c
	0	1.08e-05	0.551864	0.551864	0	0	1.08e-05	0	4.21956	-1.00005	0
	0.0207692	1.0782e-05	0.555447	0.558009	6.5612e-06	0.0207684	9.91329e-06	8.68735e-07	4.21956	-1.08768	9.44905e-07
	0.0414694	1.07641e-05	0.562126	0.563064	8.78685e-07	0.0414678	9.16114e-06	1.60298e-06	4.21956	-1.17503	1.88354e-06
	0.062101	1.07463e-05	0.568125	0.56726	7.49091e-07	0.0620988	8.51507e-06	2.2312e-06	4.21956	-1.26208	2.81594e-06
	0.10316	1.07107e-05	0.574504	0.573714	6.24587e-07	0.103156	7.46251e-06	3.24824e-06	4.21956	-1.43533	4.66226e-06
	0.143947	1.06755e-05	0.57775	0.578299	3.00654e-07	0.143943	6.64153e-06	4.03392e-06	4.21956	-1.60744	6.48422e-06
	0.184468	1.06404e-05	0.581743	0.581574	2.85099e-08	0.184463	5.98329e-06	4.65711e-06	4.21956	-1.77842	8.28219e-06
	0.264714	1.0571e-05	0.586631	0.58551	1.25695e-06	0.264709	4.99347e-06	5.57749e-06	4.21956	-2.11702	1.18075e-05
	0.422107	1.04348e-05	0.586701	0.587538	7.00041e-07	0.4221	3.75206e-06	6.68272e-06	4.21956	-2.78115	1.85855e-05
		Values	4.21956	59229.3	1.10997e-05
		Stand Dev.	0.412682	417.914
		Quality of fit	0.991282	0.00125924

## Sheet: DMF Fit1
FIT AT 295 nm				DMF	Replicate 1	(wetter)
Known species Present	Molar absorbtivity
H	51894.5	M-1	A is at 295 nm	0.539703	at concentration of	1.04e-05	M	epsilon	51894.5
G	0	M-1
Fit to absorbance at 295 nm		Using: -(b2+4ac)0.5 term
	Equilibrium const. K		3.17136	M-1				a = K
	molar absorbtivity of H.G, eHG		60525.6	M-1 cm-1			x = [H.G]	b = (- K[HTOT] - K[GTOT] -1)
								c = K[HTOT][GTOT]
			Baseline corrected
	[GTOT] (M)	[HTOT] (M)	A295 Obs	A295 Calc	(Obs-Calc)2	Calc [G]	Calc [H]	Calc [H.G]	a	b	c
	0	1.04e-05	0.539703	0.539703	0	0	1.04e-05	0	3.17136	-1.00003	0
	0.0215797	1.03827e-05	0.544844	0.544545	8.93349e-08	0.0215791	9.71767e-06	6.65028e-07	3.17136	-1.06847	7.10561e-07
	0.0430878	1.03654e-05	0.547168	0.548665	2.24197e-06	0.0430865	9.11935e-06	1.24609e-06	3.17136	-1.13668	1.4164e-06
	0.0645245	1.03483e-05	0.549223	0.55219	8.7975e-06	0.0645227	8.59044e-06	1.75782e-06	3.17136	-1.20466	2.11757e-06
	0.107185	1.0314e-05	0.558531	0.557826	4.98109e-07	0.107183	7.69754e-06	2.61651e-06	3.17136	-1.33996	3.50598e-06
	0.149565	1.02801e-05	0.564552	0.562024	6.38849e-06	0.149562	6.97278e-06	3.30728e-06	3.17136	-1.47436	4.87608e-06
	0.191666	1.02463e-05	0.566661	0.56516	2.25385e-06	0.191662	6.37275e-06	3.87355e-06	3.17136	-1.60787	6.22814e-06
	0.275045	1.01794e-05	0.567262	0.56919	3.71448e-06	0.27504	5.43701e-06	4.74243e-06	3.17136	-1.8723	8.87918e-06
		Values	3.17136	60525.6	2.39837e-05
		Stand Dev.	0.958602	1671.67
		Quality of fit	0.969149	0.00199932

## Sheet: DMF Fit2
FIT AT 295 nm				DMF	Replicate 2	(wetter)
Known species Present	Molar absorbtivity
H	53175.1	M-1	A is at 295 nm	0.553021	at concentration of	1.04e-05	M	epsilon	53175.1
G	0	M-1
Fit to absorbance at 295 nm		Using: -(b2+4ac)0.5 term
Optimised variables:	Equilibrium const. K		3.60206	M-1				a = K
	molar absorbtivity of H.G, eHG		60364.7	M-1 cm-1			x = [H.G]	b = (- K[HTOT] - K[GTOT] -1)
								c = K[HTOT][GTOT]
			Baseline corrected
	[GTOT] (M)	[HTOT] (M)	A295 Obs	A295 Calc	(Obs-Calc)2	Calc [G]	Calc [H]	Calc [H.G]	a	b	c
	0	1.04e-05	0.553021	0.553021	0	0	1.04e-05	0	3.60206	-1.00004	0
	0.0215797	1.03827e-05	0.556192	0.557485	1.67057e-06	0.021579	9.63387e-06	7.4883e-07	3.60206	-1.07777	8.07063e-07
	0.0430878	1.03654e-05	0.560031	0.561196	1.35625e-06	0.0430864	8.97286e-06	1.39259e-06	3.60206	-1.15524	1.60877e-06
	0.0645245	1.03483e-05	0.566229	0.5643	3.72073e-06	0.0645225	8.39674e-06	1.95152e-06	3.60206	-1.23246	2.40516e-06
	0.107185	1.0314e-05	0.56769	0.569105	2.00444e-06	0.107182	7.44118e-06	2.87287e-06	3.60206	-1.38613	3.98213e-06
	0.149565	1.02801e-05	0.572001	0.57252	2.69168e-07	0.149561	6.68088e-06	3.59919e-06	3.60206	-1.53878	5.53831e-06
	0.191666	1.02463e-05	0.575744	0.574935	6.54992e-07	0.191662	6.06154e-06	4.18476e-06	3.60206	-1.69043	7.07399e-06
	0.275045	1.01794e-05	0.579191	0.577715	2.17731e-06	0.27504	5.11347e-06	5.06597e-06	3.60206	-1.99077	1.00851e-05
	0.43858	1.00483e-05	0.577568	0.578559	9.83398e-07	0.438573	3.89504e-06	6.15327e-06	3.60206	-2.57983	1.58742e-05
		Values	3.60206	60364.7	1.28369e-05
		Stand Dev.	0.485749	530.527
		Quality of fit	0.98119	0.00135419

## Sheet: DMF Fit3
FIT AT 295 nm				DMF	Replicate 3	(drier)
Known species Present	Molar absorbtivity
H	50235.3	M-1	A is at 295 nm	0.542541	at concentration of	1.08e-05	M	epsilon	50235.3
G	0	M-1
Fit to absorbance at 295 nm		Using: -(b2+4ac)0.5 term
Optimised variables:	Equilibrium const. K		6.97113	M-1				a = K
	molar absorbtivity of H.G, eHG		55042.6	M-1 cm-1			x = [H.G]	b = (- K[HTOT] - K[GTOT] -1)
								c = K[HTOT][GTOT]
			Baseline corrected
	[GTOT] (M)	[HTOT] (M)	A295 Obs	A295 Calc	(Obs-Calc)2	Calc [G]	Calc [H]	Calc [H.G]	a	b	c
	0	1.08e-05	0.542541	0.542541	0	0	1.08e-05	0	6.97113	-1.00008	0
	0.0215797	1.0782e-05	0.548452	0.548416	1.29189e-09	0.0215783	9.37221e-06	1.40982e-06	6.97113	-1.15051	1.622e-06
	0.0430878	1.07641e-05	0.5531	0.552691	1.67385e-07	0.0430853	8.27784e-06	2.48628e-06	6.97113	-1.30045	3.23322e-06
	0.0645245	1.07463e-05	0.556036	0.555869	2.7713e-08	0.0645212	7.41232e-06	3.33395e-06	6.97113	-1.44988	4.83376e-06
	0.107185	1.07107e-05	0.557553	0.560077	6.36983e-06	0.107181	6.13034e-06	4.58041e-06	6.97113	-1.74728	8.0031e-06
	0.149565	1.06755e-05	0.564383	0.56248	3.62307e-06	0.14956	5.22641e-06	5.44905e-06	6.97113	-2.04271	1.11306e-05
	0.191666	1.06404e-05	0.564214	0.563779	1.8948e-07	0.19166	4.55479e-06	6.0856e-06	6.97113	-2.3362	1.4217e-05
	0.275045	1.0571e-05	0.564369	0.564434	4.18482e-09	0.275038	3.62351e-06	6.94745e-06	6.97113	-2.91745	2.02685e-05
	0.43858	1.04348e-05	0.56166	0.561994	1.11773e-07	0.438572	2.57183e-06	7.86295e-06	6.97113	-4.05747	3.19032e-05
		Values	6.97113	55042.6	1.04947e-05
		Stand Dev.	0.818323	244.189
		Quality of fit	0.978076	0.00122444

## Sheet: DMF Fit4
FIT AT 295 nm				DMF	Replicate 4	(drier)
Known species Present	Molar absorbtivity
H	51107.6	M-1	A is at 295 nm	0.551962	at concentration of	1.08e-05	M	epsilon	51107.6
G	0	M-1
Fit to absorbance at 295 nm		Using: -(b2+4ac)0.5 term
Optimised variables:	Equilibrium const. K		7.76933	M-1				a = K
	molar absorbtivity of H.G, eHG		56210.7	M-1 cm-1			x = [H.G]	b = (- K[HTOT] - K[GTOT] -1)
								c = K[HTOT][GTOT]
			Baseline corrected
	[GTOT] (M)	[HTOT] (M)	A295 Obs	A295 Calc	(Obs-Calc)2	Calc [G]	Calc [H]	Calc [H.G]	a	b	c
	0	1.08e-05	0.551962	0.551962	0	0	1.08e-05	0	7.76933	-1.00008	0
	0.0215797	1.0782e-05	0.557125	0.558943	3.30682e-06	0.0215782	9.23397e-06	1.54806e-06	7.76933	-1.16774	1.80772e-06
	0.0430878	1.07641e-05	0.565453	0.563904	2.3993e-06	0.0430851	8.06457e-06	2.69955e-06	7.76933	-1.33485	3.60343e-06
	0.0645245	1.07463e-05	0.567831	0.567527	9.26162e-08	0.0645209	7.15805e-06	3.58822e-06	7.76933	-1.5014	5.38724e-06
	0.107185	1.07107e-05	0.572381	0.572235	2.1427e-08	0.10718	5.84418e-06	4.86657e-06	7.76933	-1.83284	8.91946e-06
	0.149565	1.06755e-05	0.574285	0.574876	3.48793e-07	0.149559	4.93782e-06	5.73763e-06	7.76933	-2.1621	1.24051e-05
	0.191666	1.06404e-05	0.576351	0.576289	3.90197e-09	0.19166	4.27485e-06	6.36555e-06	7.76933	-2.4892	1.58448e-05
	0.275045	1.0571e-05	0.576417	0.577004	3.44689e-07	0.275038	3.36992e-06	7.20104e-06	7.76933	-3.137	2.25892e-05
	0.43858	1.04348e-05	0.574967	0.574464	2.5243e-07	0.438571	2.36756e-06	8.06723e-06	7.76933	-4.40755	3.55562e-05
		Values	7.76933	56210.7	6.76998e-06
		Stand Dev.	0.657309	179.308
		Quality of fit	0.989024	0.000983433

## Sheet: Pyridine Fit1
FIT AT 295 nm				Pyridine	Replicate 1
Known species Present	Molar absorbtivity
H	51848.1	M-1	A is at 295 nm	0.53922	at concentration of	1.04e-05	M	epsilon	51848.1
G	0	M-1
Fit to absorbance at 295 nm		Using: -(b2+4ac)0.5 term
Optimised variables:	Equilibrium const. K		7050.12	M-1				a = K
	molar absorbtivity of H.G, eHG		58613.9	M-1 cm-1			x = [H.G]	b = (- K[HTOT] - K[GTOT] -1)
								c = K[HTOT][GTOT]
			Baseline corrected
	[GTOT] (M)	[HTOT] (M)	A295 Obs	A295 Calc	(Obs-Calc)2	Calc [G]	Calc [H]	Calc [H.G]	a	b	c
	0	1.04e-05	0.53922	0.53922	0	0	1.04e-05	0	7050.12	-1.07332	0
	1.2396e-05	1.03827e-05	0.540032	0.543638	1.29996e-05	1.16104e-05	9.59712e-06	7.85572e-07	7050.12	-1.16059	9.07378e-07
	2.47508e-05	1.03654e-05	0.544708	0.547319	6.81944e-06	2.3289e-05	8.90357e-06	1.46188e-06	7050.12	-1.24757	1.80873e-06
	3.70647e-05	1.03483e-05	0.551072	0.550399	4.52748e-07	3.50158e-05	8.29942e-06	2.04884e-06	7050.12	-1.33427	2.70411e-06
	6.15702e-05	1.0314e-05	0.554965	0.555154	3.56534e-08	5.85565e-05	7.30028e-06	3.01377e-06	7050.12	-1.50679	4.4771e-06
	8.59143e-05	1.02801e-05	0.558617	0.558509	1.15793e-08	8.21442e-05	6.50997e-06	3.7701e-06	7050.12	-1.67818	6.2267e-06
	0.000110099	1.02463e-05	0.563663	0.560856	7.87653e-06	0.000105723	5.8706e-06	4.3757e-06	7050.12	-1.84844	7.95326e-06
	0.000157993	1.01794e-05	0.563951	0.563492	2.10309e-07	0.000152716	4.90182e-06	5.27762e-06	7050.12	-2.18564	1.13386e-05
	0.000251932	1.00483e-05	0.562625	0.564079	2.11486e-06	0.000245563	3.67902e-06	6.36929e-06	7050.12	-2.84699	1.78473e-05
		Values	7050.12	58613.9	3.05207e-05
		Stand Dev.	1562.56	776.011
		Quality of fit	0.954763	0.00208808

## Sheet: Pyridine Fit2
FIT AT 295 nm				Pyridine	Replicate 2
Known species Present	Molar absorbtivity
H	51377.6	M-1	A is at 295 nm	0.534327	at concentration of	1.04e-05	M	epsilon	51377.6
G	0	M-1
Fit to absorbance at 295 nm		Using: -(b2+4ac)0.5 term
Optimised variables:	Equilibrium const. K		8760.33	M-1				a = K
	molar absorbtivity of H.G, eHG		57002.4	M-1			x = [H.G]	b = (- K[HTOT] - K[GTOT] -1)
								c = K[HTOT][GTOT]
			Baseline corrected
	[GTOT] (M)	[HTOT] (M)	A295 Obs	A295 Calc	(Obs-Calc)2	Calc [G]	Calc [H]	Calc [H.G]	a	b	c
	0	1.04e-05	0.534327	0.534327	0	0	1.04e-05	0	8760.33	-1.09111	0
	1.2396e-05	1.03827e-05	0.537895	0.538762	7.51257e-07	1.14495e-05	9.43623e-06	9.4647e-07	8760.33	-1.19955	1.12749e-06
	2.47508e-05	1.03654e-05	0.542712	0.542333	1.43171e-07	2.30118e-05	8.62644e-06	1.73901e-06	8760.33	-1.30763	2.24749e-06
	3.70647e-05	1.03483e-05	0.546802	0.545224	2.49074e-06	3.46547e-05	7.9383e-06	2.40996e-06	8760.33	-1.41535	3.36007e-06
	6.15702e-05	1.0314e-05	0.547925	0.549477	2.41042e-06	5.80917e-05	6.83547e-06	3.47858e-06	8760.33	-1.62973	5.56315e-06
	8.59143e-05	1.02801e-05	0.551982	0.552274	8.54327e-08	8.16282e-05	5.99389e-06	4.28617e-06	8760.33	-1.84269	7.73717e-06
	0.000110099	1.02463e-05	0.555195	0.554069	1.26749e-06	0.000105185	5.33258e-06	4.91373e-06	8760.33	-2.05426	9.88256e-06
	0.000157993	1.01794e-05	0.554976	0.555712	5.41706e-07	0.000152177	4.36302e-06	5.81643e-06	8760.33	-2.47325	1.40891e-05
	0.000251932	1.00483e-05	0.555077	0.554818	6.7414e-08	0.000245077	3.19302e-06	6.85528e-06	8760.33	-3.29504	2.21767e-05
		Values	8760.33	57002.4	7.75764e-06
		Stand Dev.	1027.38	315.855
		Quality of fit	0.983849	0.00105273

## Sheet: NBu4Cl Fit 1
FIT AT 295 nm				NBu4Cl.1⅔H2O	Replicate 1
Known species Present	Molar absorbtivity
H	54225.2	M-1	A is at 295 nm	0.563942	at concentration of	1.04e-05	M	epsilon	54225.2
G	0	M-1
Fit to absorbance at 295 nm		Using: -(b2+4ac)0.5 term
Optimised variables:	Equilibrium const. K		26697.7	M-1				a = K
	molar absorbtivity of H.G, eHG		60777.6	M-1 cm-1			x = [H.G]	b = (- K[HTOT] - K[GTOT] -1)
								c = K[HTOT][GTOT]
			Baseline corrected
	[GTOT] (M)	[HTOT] (M)	A295 Obs	A295 Calc	(Obs-Calc)2	Calc [G]	Calc [H]	Calc [H.G]	a	b	c
	0	1.04e-05	0.563942	0.563942	0	0	1.04e-05	0	26697.7	-1.27766	0
	5.95674e-06	1.03827e-05	0.568075	0.570705	6.91539e-06	4.7814e-06	9.20736e-06	1.17534e-06	26697.7	-1.43622	1.65117e-06
	1.18937e-05	1.03654e-05	0.576063	0.576099	1.31384e-09	9.7524e-06	8.22416e-06	2.14129e-06	26697.7	-1.59427	3.29138e-06
	1.78109e-05	1.03483e-05	0.58403	0.580405	1.31376e-05	1.48702e-05	7.40749e-06	2.94077e-06	26697.7	-1.75179	4.92071e-06
	2.95868e-05	1.0314e-05	0.585644	0.586602	9.18386e-07	2.54172e-05	6.14451e-06	4.16954e-06	26697.7	-2.06526	8.14705e-06
	4.1285e-05	1.02801e-05	0.588657	0.590558	3.61444e-06	3.62305e-05	5.22555e-06	5.05452e-06	26697.7	-2.37667	1.13308e-05
	5.29064e-05	1.02463e-05	0.592811	0.593039	5.18845e-08	4.71939e-05	4.53383e-06	5.71248e-06	26697.7	-2.68603	1.44727e-05
	7.59217e-05	1.01794e-05	0.597006	0.595283	2.96921e-06	6.93134e-05	3.5711e-06	6.60834e-06	26697.7	-3.2987	2.0633e-05
	0.000121063	1.00483e-05	0.593851	0.594376	2.75526e-07	0.000113508	2.49314e-06	7.55517e-06	26697.7	-4.50036	3.24771e-05
		Values	26697.7	60777.6	2.78838e-05
		Stand Dev.	4727.83	469.75
		Quality of fit	0.973345	0.00199584

[truncated: 5 more sheets: NBu4Cl Fit2, NBu4F Fit1A, NBu4F Fit2A, NBu4F Fit 1B, NBu4F Fit 2B]
